# Supplementary material for: Discovery of novel aporphine alkaloid derivative as potent TLR2 antagonist reversing macrophage polarization and neutrophil infiltration against acute inflammation
Source: PubMed Central journal article supplement — Acta Pharm Sin B. 2023 Jun 1;13(9):3782–801. doi: 10.1016/j.apsb.2023.05.034 (PMC10501872; doi:10.1016/j.apsb.2023.05.034), 2023-06-01
Supplement: mmc1.pdf [file mmc1.pdf]

**Supporting Information for**

**Original article**

**Discovery of novel aporphine alkaloid derivative as potent TLR2 antagonist reversing macrophage polarization and neutrophil infiltration against acute inflammation**

Junjie Yang<sup>a</sup>, Yue Pan<sup>a</sup>, Xiaoshan Zeng<sup>a</sup>, Shuwen Liu<sup>a,\*</sup>, Zhipeng Chen<sup>a,\*</sup>, Kui Cheng<sup>a,b,\*</sup>

<sup>a</sup>*Guangdong Provincial Key Laboratory of New Drug Screening and NMPA Key Laboratory for Research and Evaluation of Drug Metabolism, School of Pharmaceutical Sciences, Southern Medical University, Guangzhou 510515, China*

<sup>b</sup>*Department of Musculoskeletal Oncology, the Third Affiliated Hospital of Southern Medical University, Guangzhou 510642, China*

\*Correspondence author.

E-mail addresses: Liusw@smu.edu.cn (Shuwen Liu), czpwyq@smu.edu.cn (Zhipeng Chen), Chengk@smu.edu.cn (Kui Cheng)

Received 9 February 2023; received in revised form 9 May 2023; accepted 19 May 2023

This Supplementary Information file includes:

**Figure S1.** The reported TLR2 small molecule inhibitors and the present work.

**Figure S2.** The comparison of cytotoxicity between Taspine and SMU-Y6 in HEK-Blue hTLR2 cell.

**Figure S3.** SMU-Y6 inhibited both SEAP signal and the production of inflammatory cytokines induced by Pam<sub>2</sub>CSK<sub>4</sub>.

**Figure S4.** The ratio between MyD88 and TLR2 in Co-IP.

**Figure S5.** CETSA experiment of SMU-Y6 to TLR4 and SPR assay of TAK242 to TLR4.

**Figure S6.** The competitive binding experiment between SMU-Y6 and Rhodamine-Pam3CSK4 in HEK-Blue hTLR2 cells.

**Figure S7.** Western blot analysis of local tissue of carrageenan-induced paw edema model. (A) SMU-Y6 down-regulated the expression of TLR2 protein in carrageenan-induced paw edema model. (B) The ratio of TLR2 to GAPDH.

**Figure S8.** Inflammatory cytokines analysis of SMU-Y6 in CLP model.

**Figure S9.** Plasma concentration-time curve of SMU-Y6 of two different administration.

**Figure S10.** Toxicity study of SMU-Y6 *in vivo*.

**Figure S11.** The purity of SMU-Y6.

**Table S1.** Natural compounds exhibited more than 90% inhibition to TLR2 SEAP signaling at 10  $\mu$ mol/L in HEK-blue hTLR2 cell.

**Table S2.** IC<sub>50</sub> values of Y1-Y22 for the inhibition of TLR2 in HEK-Blue hTLR2 cells.

**Scheme S1.** Synthesis of Y6-Y122.

**Note S1.** <sup>1</sup>H NMR, <sup>13</sup>C NMR spectrum and ESI-HRMS of all the compounds.

Figure S1

□ Previously reported TLR2 antagonist

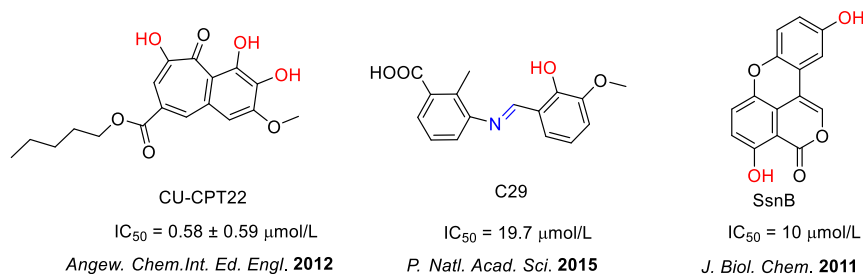

□ This work:

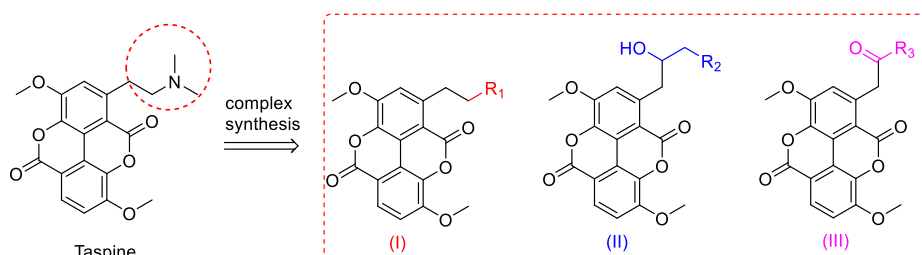

Figure S1. The reported TLR2 small molecule inhibitors and the present work.

Figure S2

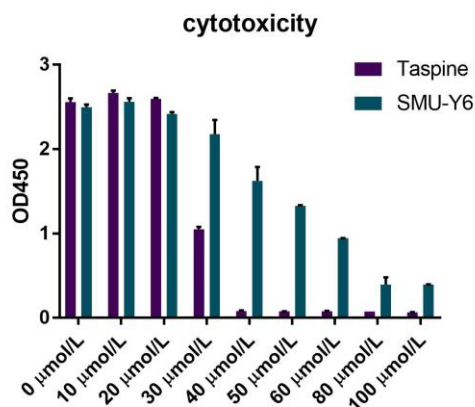

Figure S2. The comparison of cytotoxicity between Taspine and SMU-Y6 in HEK-Blue hTLR2 cell. HEK-hTLR2 cells were seeded in 96-well plate with 100  $\mu\text{L}$  freshmedium (with 10% FBS and 1% pen/strep) and incubated at 37  $^{\circ}\text{C}$  overnight. Indicated concentration compounds of SMU-Y6 were added to 200  $\mu\text{L}$  totally and incubated at 37  $^{\circ}\text{C}$  for 24 h. Cell counting kit-8 (CCK-8) (Beyotime, C0038) was added into each well for 20  $\mu\text{L}$  and incubated at 37  $^{\circ}\text{C}$  for 1–4 h until it turned into orange. Then the plate was measured at an absorbance of 450 nm.

**Figure S3**

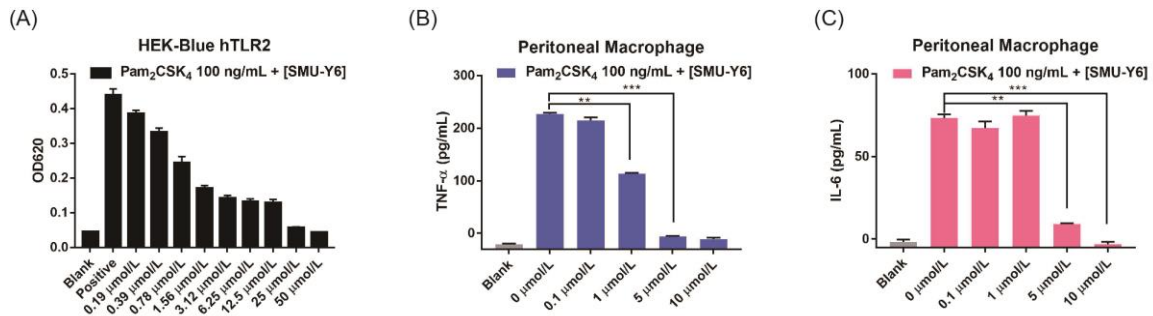

**Figure S3. SMU-Y6 inhibited both SEAP signal and the production of inflammatory cytokines induced by Pam<sub>2</sub>CSK<sub>4</sub>.** (A) SEAP signaling of Taspine and SMU-Y6 in HEK-Blue hTLR2 cells. HEK-Blue hTLR2 cells were treated with Pam<sub>2</sub>CSK<sub>4</sub> (100 ng/mL) and indicated Taspine or SMU-Y6 for 24 h. The supernatant was collected for SEAP signaling. (B-C) TNF- $\alpha$  or IL-6 in supernatants of primary Murine Peritoneal Macrophage cells after treatment with indicated Pam<sub>2</sub>CSK<sub>4</sub> (100 ng/mL) and different concentration of SMU-Y6 for 24 h. The supernatant was collected for TNF- $\alpha$  or IL-6 testing. Data presented are mean  $\pm$  SD and the figures shown are representative of three independent experiments.

**Figure S4**

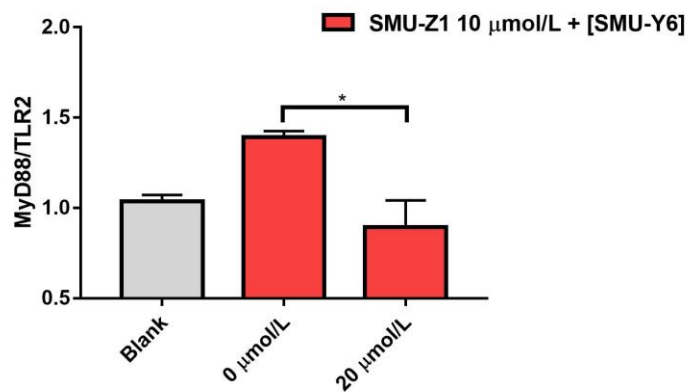

**Figure S4. The ratio between MyD88 and TLR2 in Co-IP.** The ratio between MyD88 and TLR2 was homogenized through ImageJ.

**Figure S5**

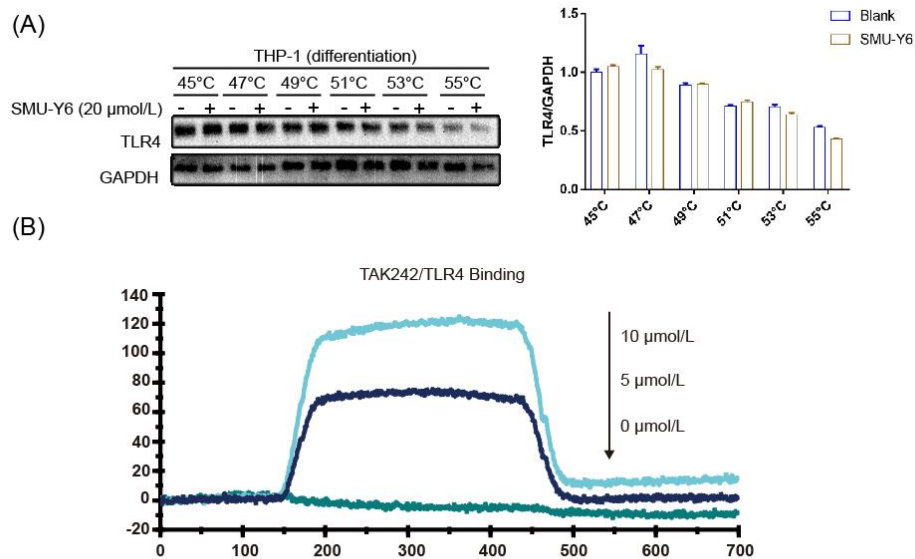

**Figure S5. CETSA experiment suggested that SMU-Y6 (20  $\mu\text{mol/L}$ ) failed to reduce the degradation of TLR4 when heated in different temperature. (A)** THP-1 cells were stimulated with PMA for 24 h, then cultured in fresh medium for another 24 h. Cells were collected, suspended in PBS, and incubated with 20  $\mu\text{mol/L}$  SMU-Y6 or medium for 0.5 h. Cells were heated at indicated temperature for 3 min. The proteins were extracted for Western Blot. **(B)** Surface plasmon resonance experiment of TAK242 binding to recombinant hTLR4 protein.

Figure S6

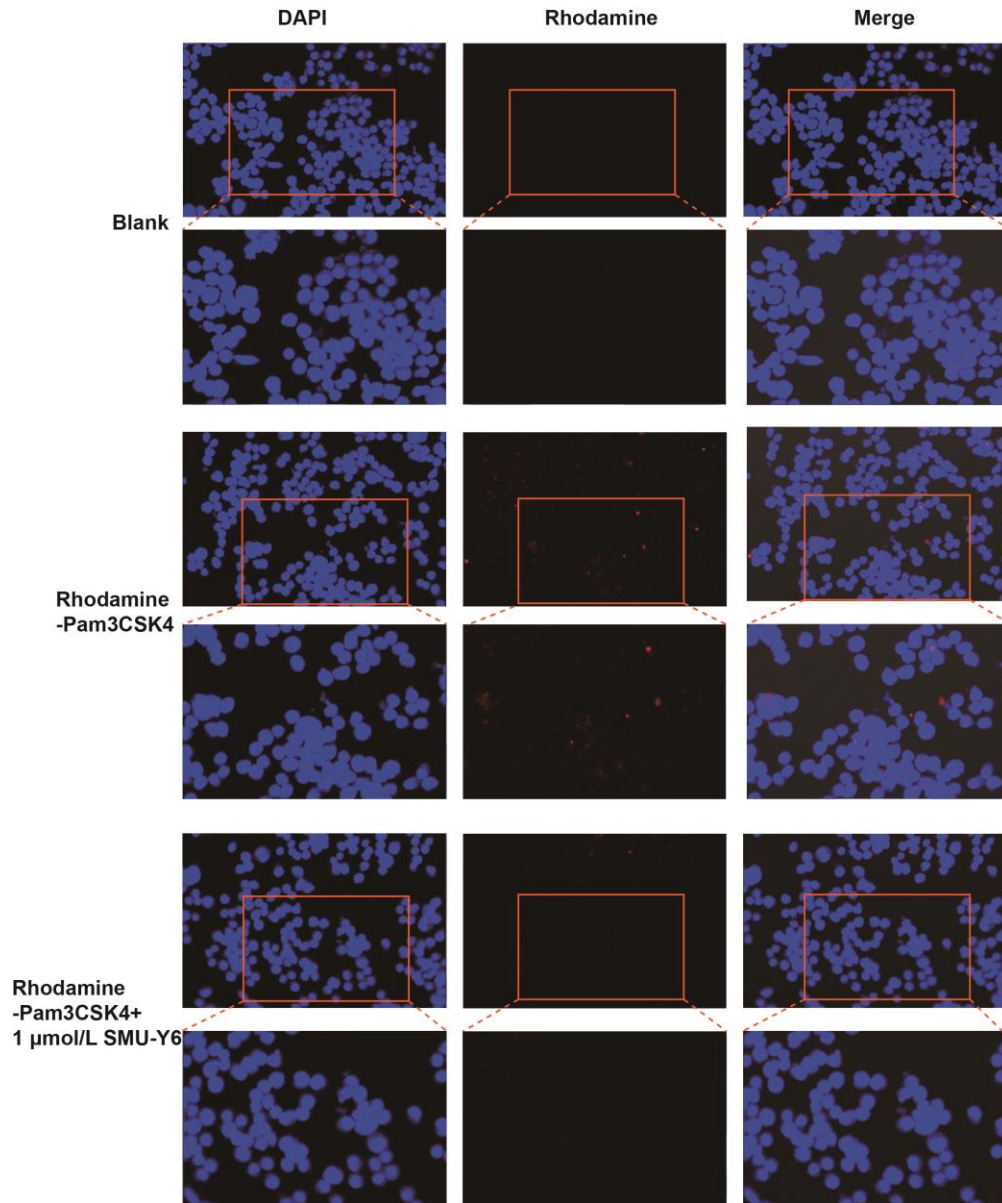

**Figure S6. The competitive binding experiment between SMU-Y6 and Rhodamine-Pam<sub>3</sub>CSK<sub>4</sub> in HEK-Blue hTLR2 cells.** HEK-Blue hTLR2 cells were cultured with 800 ng/mL rhodamine-Pam<sub>3</sub>CSK<sub>4</sub> and 1 μmol/L SMU-Y6 for 4 h. Cells were washed with PBS for three times. DAPI was added in and incubated for 5 min. Removed the supernatant and washed with PBS for three times.

**Figure S7**

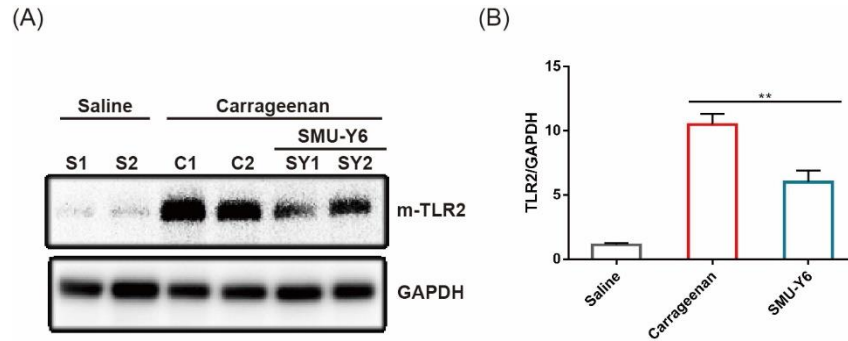

**Figure S7. Western blot analysis of local tissue of carrageenan-induced paw edema model. (A)** SMU-Y6 down-regulated the expression of TLR2 protein in carrageenan-induced paw edema model. Mice paw tissues were collected and washed in PBS. Proteins were extracted with tissue total protein lysis buffer. The supernatant was collected for Western Blot. **(B)** The ratio of TLR2 to GAPDH.

**Figure S8**

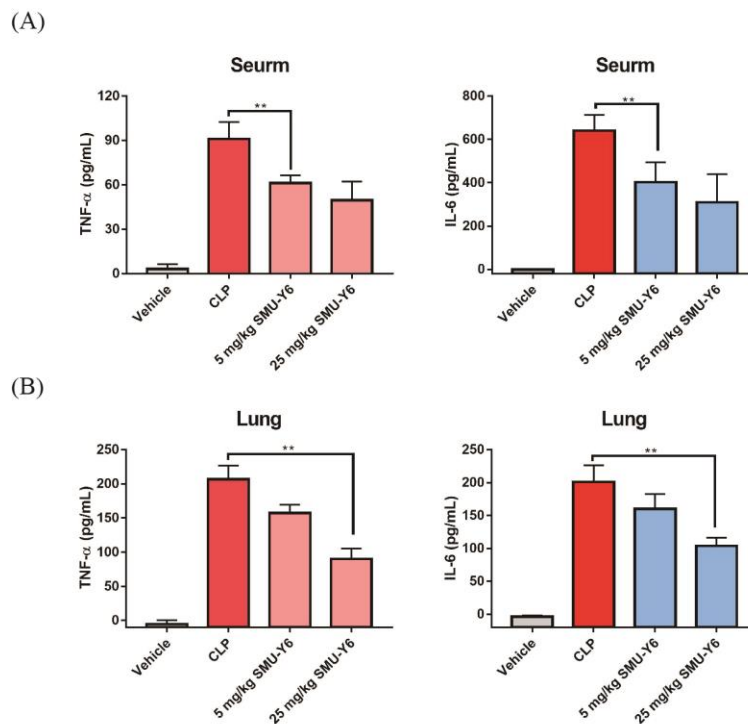

**Figure S8. Inflammatory cytokines analysis of SMU-Y6 in CLP model.** TNF- $\alpha$  and IL-6 were tested in mice **(A)** seurm and **(B)** lung tissue of CLP model. Mice were orally pretreated with saline, 5 mg/kg SMU-Y6, 25 mg/kg SMU-Y6 for 1 h. All mice were treated with cecal ligation and puncture, except that the mice from the vehicle group was underwent laparotomy without cecal ligation and puncture. All mice were sacrificed 8 h after surgery. Seurm and lung tissue were collected for Elisa assay.

**Figure S9**

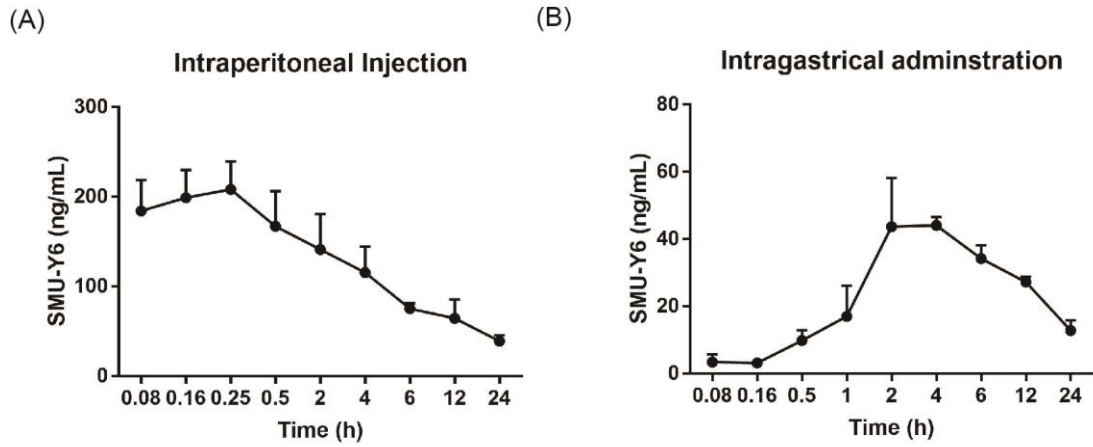

**Figure S9. Plasma concentration-time curve of SMU-Y6 of two different administration. (A)** Plasma concentration-time curve of SMU-Y6 in intraperitoneal injection administration. **(B)** Plasma concentration-time curve of SMU-Y6 in intragastrical administration.



**Figure S10**

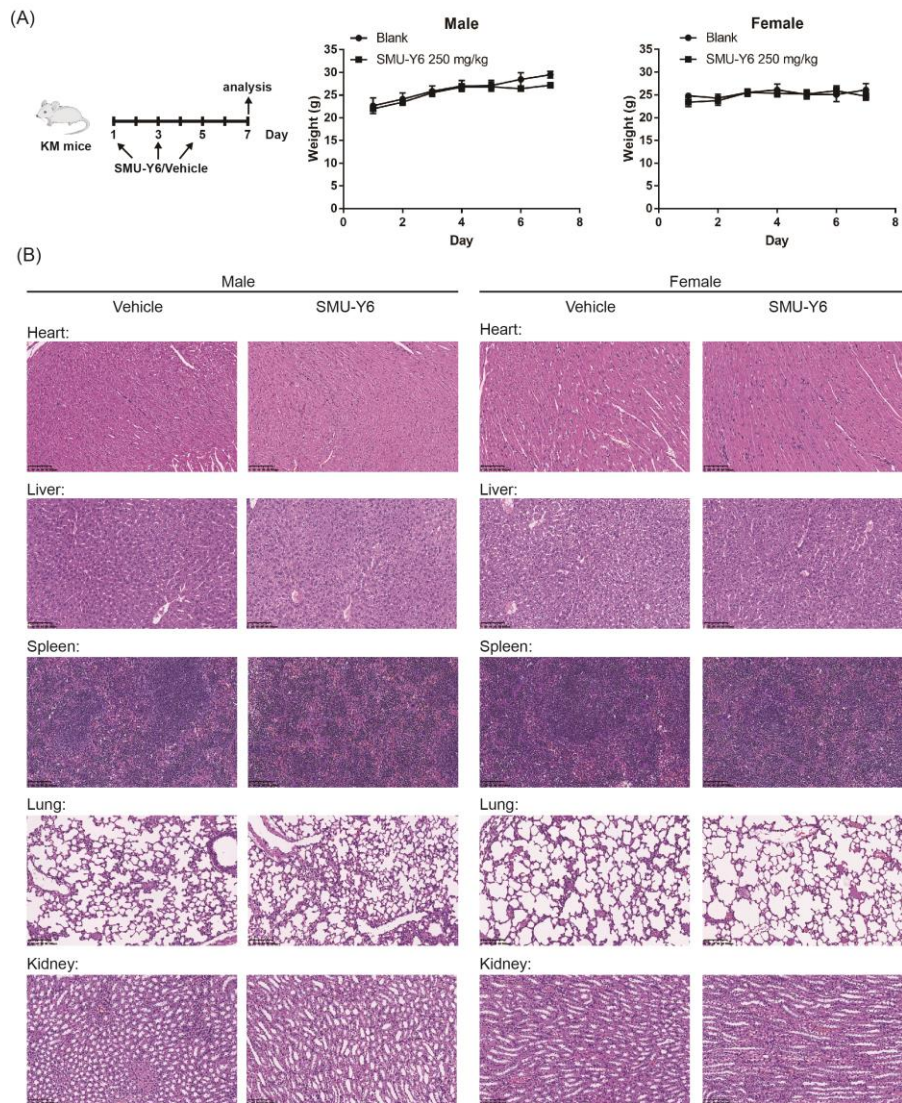

**Figure S10. Toxicity studie os SMU-Y6 *in vivo*.** (A) The change of mice's body weight in 7 days after contious oral administration of 250 mg/kg SMU-Y6. (B) HE staining results of mice tissue at day 7, inlcuding heart, liver, spleen, lung and kidney.

**Figure S11**

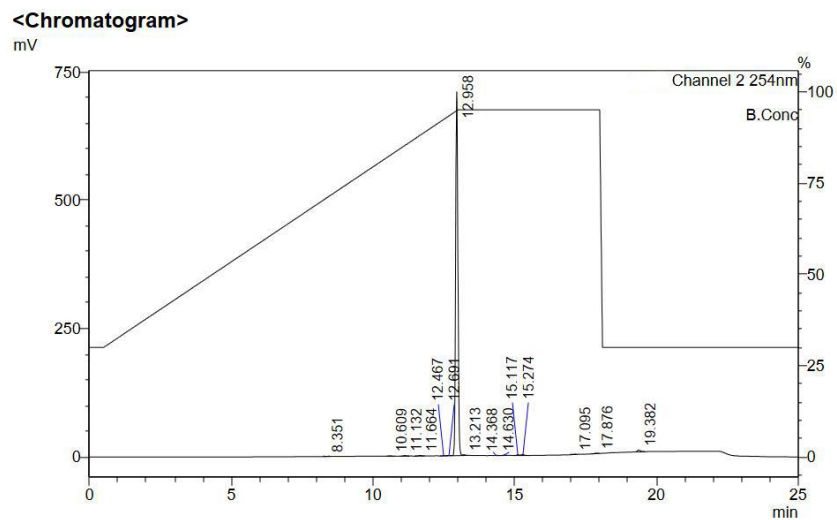

<Peak Table>

| Channel 2 254nm |           |         |        |         |
|-----------------|-----------|---------|--------|---------|
| Peak#           | Ret. Time | Area    | Height | Area%   |
| 1               | 8.351     | 2226    | 399    | 0.055   |
| 2               | 10.609    | 3339    | 636    | 0.083   |
| 3               | 11.132    | 7878    | 1220   | 0.195   |
| 4               | 11.664    | 9589    | 1258   | 0.237   |
| 5               | 12.467    | 1605    | 257    | 0.040   |
| 6               | 12.691    | 3704    | 572    | 0.092   |
| 7               | 12.958    | 3938243 | 709170 | 97.387  |
| 8               | 13.213    | 8597    | 1434   | 0.213   |
| 9               | 14.368    | 3429    | 498    | 0.085   |
| 10              | 14.630    | 5784    | 1132   | 0.143   |
| 11              | 15.117    | 8918    | 1558   | 0.221   |
| 12              | 15.274    | 14170   | 2084   | 0.350   |
| 13              | 17.095    | 4709    | 677    | 0.116   |
| 14              | 17.876    | 6263    | 1042   | 0.155   |
| 15              | 19.382    | 25444   | 3461   | 0.629   |
| Total           |           | 4043897 | 725398 | 100.000 |

**Figure S11. The purity of SMU-Y6.** The purity of SMU-Y6 was carried out through liquid chromatogram. Results showed that SMU-Y6 has a purity more than 97%.

**Table S1.** Natural compounds exhibited more than 90% inhibition to TLR2 SEAP signaling at 10  $\mu$ M in HEK-bule hTLR2 cell.

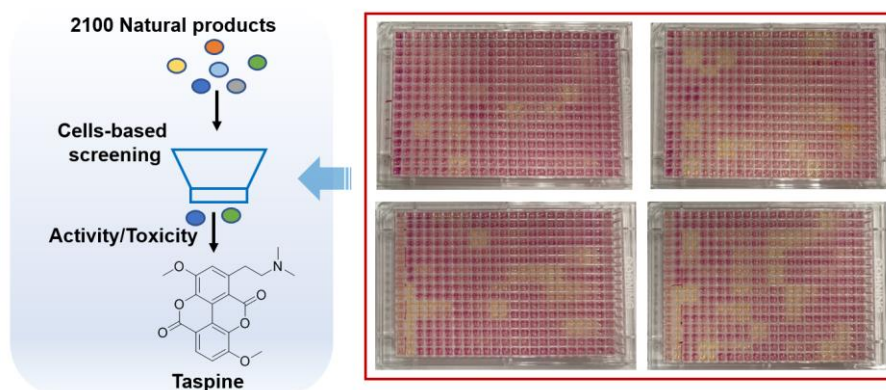

|                  |               |               |               |               |
|------------------|---------------|---------------|---------------|---------------|
| <b>Compound</b>  | <b>P1-D2</b>  | <b>P5-E6</b>  | <b>P7-B2</b>  | <b>P7-A10</b> |
| <b>Structure</b> |               |               |               |               |
| <b>Cas NO.</b>   | 81-23-2       | 470-17-7      | 553-21-9      | 546-43-0      |
| <b>Compound</b>  | <b>P5-D3</b>  | <b>P6-C11</b> | <b>P11-C4</b> | <b>P21-D9</b> |
| <b>Structure</b> |               |               |               |               |
| <b>Cas NO.</b>   | 5508-58-7     | 59865-13-3    | 56725-99-6    | 602-07-3      |
| <b>Compound</b>  | <b>P5-E10</b> | <b>P13-G4</b> | <b>P8-G10</b> | <b>P14-E7</b> |
| <b>Structure</b> |               |               |               |               |
| <b>Cas NO.</b>   | 56-25-7       | 83-79-4       | 4429-63-4     | 491-70-3      |

**Table S2.** The IC<sub>50</sub> values of Y1-Y22 for the inhibition of TLR2 in HEK-Blue hTLR2 cells

| Compound                                | Y1          | Y2        | Y3        | Y4         | Y5         |
|-----------------------------------------|-------------|-----------|-----------|------------|------------|
| <b>Structure</b>                        |             |           |           |            |            |
| <b>IC<sub>50</sub>/μM<sup>[a]</sup></b> | >100        | >100      | >100      | 45.30±3.07 | 39.52±2.56 |
| Compound                                | Y6          | Y7        | Y8        | Y9         | Y10        |
|                                         | R =         | R =       | R =       | R =        | R =        |
| <b>IC<sub>50</sub>/μM<sup>[a]</sup></b> | 1.42±0.33   | 5.83±2.19 | 1.70±0.15 | 2.55±0.07  | 1.44±0.25  |
| Compound                                | Y11(SMU-Y6) | Y12       | Y13       | Y14        | Y15        |
|                                         | R =         | R =       | R =       | R =        | R =        |
| <b>IC<sub>50</sub>/μM<sup>[a]</sup></b> | 0.11±0.04   | 1.34±0.19 | 3.05±0.16 | 2.30±0.07  | 5.92±0.69  |
| Compound                                | Y16         | Y17       | Y18       | Y19        | Y20        |
|                                         | R =         | R =       | R =       | R =        | R =        |
| <b>IC<sub>50</sub>/μM<sup>[a]</sup></b> | >100        | >100      | >100      | >100       | >100       |
| Compound                                | Y21         | Y22       |           |            |            |
|                                         | R =         | R =       |           |            |            |
| <b>IC<sub>50</sub>/μM<sup>[a]</sup></b> | >100        | >100      |           |            |            |

[a] The IC<sub>50</sub> data was determined from at least three independent experiments.

**Scheme S1**

(I)

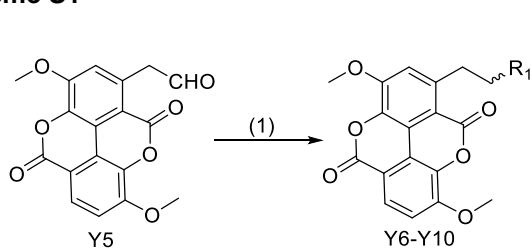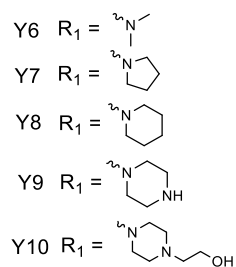

(II)

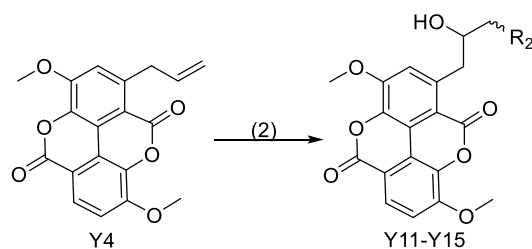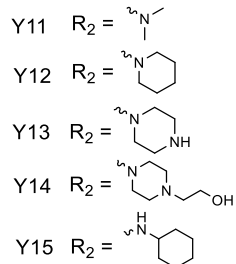

(III)

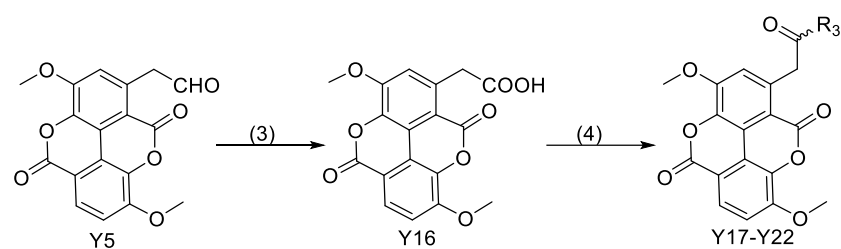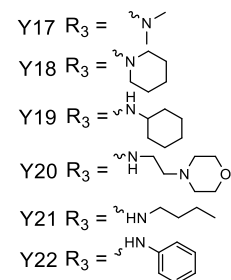

**Scheme S1.** Synthesis of Y5-Y22. Reagents and conditions used: (1) R<sub>1</sub>NH, NaBH<sub>3</sub>CN, CH<sub>2</sub>Cl<sub>2</sub>, 4h, rt, 30-40%. (2) a, m-CPBA, CH<sub>2</sub>Cl<sub>2</sub>, overnight; b, R<sub>2</sub>NH, CH<sub>2</sub>Cl<sub>2</sub>, MeOH, TEA, rf. (3) NaH<sub>2</sub>PO<sub>4</sub>, NaClO<sub>2</sub>, H<sub>2</sub>O<sub>2</sub>, CH<sub>2</sub>Cl<sub>2</sub>, *t*-BuOH, H<sub>2</sub>O, rt, 4h, 40%; (4) a, SOCl<sub>2</sub>, 4 h, rf; b, R<sub>3</sub>NH<sub>2</sub> or R<sub>3</sub>NH, CH<sub>2</sub>Cl<sub>2</sub>, TEA, 45°C, 3h, 20-30%.

**Note S1.** Synthesis, <sup>1</sup>H NMR, <sup>13</sup>C NMR spectrum and HRMS (ESI) of all the compounds.

## Synthesis method and structure characterization.

General procedure for synthesis of compounds Y6-Y10

Compound Y5 was dissolved in CH<sub>2</sub>Cl<sub>2</sub> and stirred for 30 min at room temperature. Then different aliphatic amines were added in stirred for 2 h. NaBH<sub>3</sub>CN was added in, and the mixture was stirred for another 4 h. The solvent was evaporated under vacuum, and the residue was purified by column chromatography (CH<sub>2</sub>Cl<sub>2</sub>: MeOH) to give product Y6-Y10.

*1-(2-(dimethylamino)ethyl)-3,8-dimethoxychromeno[5,4,3-cde]chromene-5,10-dione* (Taspine, Y6). Yield 45%. <sup>1</sup>H NMR (400 MHz, CDCl<sub>3</sub>) δ 8.18 (d, *J* = 8.5 Hz, 1H), 7.30 (d, *J* = 8.6 Hz, 1H), 7.18 (s, 1H), 4.10 (s, 6H), 3.50 (t, 2H), 2.66 (t, 2H), 2.38 (s, 6H). <sup>13</sup>C NMR (101 MHz, CF<sub>3</sub>COOD) δ 156.0, 155.8, 142.5, 140.2, 139.9, 132.1, 123.6, 120.3, 119.4, 118.4, 117.9, 116.6, 115.6, 111.1, 61.9, 59.3, 59.2, 46.6.4, 34.0. ESI-HRMS *m/z*: calcd. C<sub>20</sub>H<sub>20</sub>NO<sub>6</sub>[M+H]<sup>+</sup> 370.1285, found 370.1276.

*3,8-dimethoxy-1-(2-(pyrrolidin-1-yl)ethyl)chromeno[5,4,3-cde]chromene-5,10-dione* (Y7). Yield 37%. <sup>1</sup>H NMR (400 MHz, CF<sub>3</sub>COOD) δ 9.85 (d, *J* = 8.8 Hz, 1H), 9.01 (d, *J* = 8.9 Hz, 1H), 8.84 (s, 1H), 5.64 (s, 3H), 5.62 (s, 3H), 5.29 (t, *J* = 8.2 Hz, 4H), 4.97 (m, 2H), 4.58 (m, *J* = 12 Hz, 2H) 3.57 (d, *J* = 14.4 Hz, 2H) 3.46 (t, *J* = 10.6 Hz 2H). <sup>13</sup>C NMR (101 MHz, CF<sub>3</sub>COOD) δ 156.0, 155.8, 142.5, 140.2, 139.9, 132.1, 123.6, 120.3, 119.4, 118.4, 117.9, 116.6, 115.6, 111.1, 61.9, 59.3, 59.2, 46.6.4, 34.0. ESI-HRMS *m/z*: calcd. C<sub>22</sub>H<sub>22</sub>NO<sub>6</sub>[M+H]<sup>+</sup> 396.1441, found 396.1411.

*3,8-dimethoxy-1-(2-(piperidin-1-yl)ethyl)chromeno[5,4,3-cde]chromene-5,10-dione* (Y8). Yield 30%. <sup>1</sup>H NMR (400 MHz, CF<sub>3</sub>COOD) δ 9.90 (d, *J* = 8.2 Hz, 1H), 9.04 (d, *J* = 8.2 Hz, 1H), 8.86 (s, 1H), 5.67 (s, 3H), 5.65 (s, 3H), 5.30 (t, 4H), 4.99 (m, 2H), 4.60 (m, *J* = 10.8 Hz, 2H), 3.61 (d, *J* = 14.1 Hz, 2H), 3.58-3.49 (m, 3H), 3.14-3.08 (m, 1H). <sup>13</sup>C NMR (101 MHz, CF<sub>3</sub>COOD) δ 154.2, 154.1, 141.0, 138.4, 138.2, 130.4, 121.9, 118.6, 117.7, 116.7, 116.2, 114.9, 113.9, 109.5, 59.2, 57.6, 57.5, 56.3, 31.7, 24.2, 22.2. ESI-HRMS *m/z*: calcd. C<sub>23</sub>H<sub>24</sub>NO<sub>6</sub>[M+H]<sup>+</sup> 410.1598, found 410.1583.

*3,8-dimethoxy-1-(2-(piperazin-1-yl)ethyl)chromeno[5,4,3-cde]chromene-5,10-dione* (Y9). Yield 27%. <sup>1</sup>H NMR (400 MHz, CDCl<sub>3</sub>) δ 8.24 (d, *J* = 8.6 Hz, 1H), 7.55 (s, 1H), 7.33 (d, *J* = 8.6 Hz, 1H), 4.15 (s, 3H), 4.11 (s, 3H), 3.98-3.90 (m, 2H), 3.67 (s, 2H), 3.29-3.21 (m, 2H), 2.80 (s, 2H), 2.25 (s, 2H), 1.95 (m, 3H). <sup>13</sup>C NMR (101 MHz, CF<sub>3</sub>COOD) δ 156.4,

156.2, 140.6, 140.4, 132.5, 123.9, 122.0, 121.0, 119.9, 118.8, 118.3, 117.1, 116.0, 111.7, 61.3, 59.9, 59.7 58.4, 33.8, 26.3, 24.4. ESI-HRMS  $m/z$ : calcd.  $C_{22}H_{23}NO_6[M+H]^+$  411.1632, found 410.1636.

*1-(2-(4-(2-hydroxyethyl)piperazin-1-yl)ethyl)-3,8-dimethoxychromeno[5,4,3-cde]chromene-5,10-dione (Y10)*. Yield 35%.  $^1H$  NMR (400 MHz,  $CDCl_3$ )  $\delta$ = 8.20 (d,  $J$  = 8.7 Hz, 1H), 7.30 (d,  $J$  = 8.7 Hz, 1H), 7.18 (s, 1H), 4.10 (s, 6H), 3.63 (t,  $J$  = 4.4 Hz, 2H), 3.55-3.49 (m, 2H), 2.72-2.56 (m, 12H).  $^{13}C$  NMR (101 MHz,  $CDCl_3$ )  $\delta$  158.9, 157.9, 151.4, 151.0, 144.4, 138.0, 136.9, 127.1, 119.4, 118.6, 116.7, 113.8, 111.8, 109.4, 59.3, 59.2, 57.8, 56.7, 56.6, 53.1, 53.0, 32.5. ESI-HRMS  $m/z$ : calcd.  $C_{24}H_{27}N_2O_7[M+H]^+$  455.1812, found 455.1801

General procedure for synthesis of compounds Y11-Y15.

Step 1. Compound Y4 was dissolved in  $CH_2Cl_2$ , added m-CPBA (75%) and stirred at room temperature for 24h. The organic layer was extracted with 1M NaOH solution, then evaporated under vacuum. The residue was washed by EtOAc to get white solid. The crude products proceed directly to the next step without purification.

Step 2. The crude products obtained above was dissolve in  $CH_2Cl_2$ : MeOH (4:1). Different aliphatic amines and triethylamine were added in the mixture and stirred for 48 h at 45°C. The organic solvent was removed under vacuum and the residue was purified by column chromatography ( $CH_2Cl_2$ : MeOH) to give product Y11-Y15.

*1-(3-(dimethylamino)-2-hydroxypropyl)-3,8-dimethoxychromeno[5,4,3-cde]chromene-5,10-dione (Y11)*. Yield 25%.  $^1H$  NMR (400 MHz,  $CF_3COOD$ )  $\delta$ = 9.99 (d,  $J$  = 8.1 Hz, 1H), 9.22 (s, 1H), 9.04 (d,  $J$  = 8.1 Hz, 1H), 8.95 (s, 1H), 6.26 (s, 1H), 5.68 (s, 6H), 5.46 (d,  $J$  = 13.1 Hz, 1H), 5.14 (s, 2H), 4.81 (m, 1H), 4.67 (s, 3H), 4.60 (s, 3H).  $^{13}C$  NMR (101 MHz,  $CF_3COOD$ )  $\delta$  166.0, 165.8, 155.8, 155.5, 144.1, 140.0, 139.9, 131.9, 123.2, 121.7, 121.6, 117.8, 113.1, 111.4, 70.7, 65.5, 59.4, 59.2, 48.4, 45.0, 42.6. ESI-HRMS  $m/z$ : calcd.  $C_{21}H_{22}NO_7[M+H]^+$  400.13908, found 400.13913.

*1-(2-hydroxy-3-(piperidin-1-yl)propyl)-3,8-dimethoxychromeno[5,4,3-cde]chromene-5,10-dione (Y12)*. Yield 31%.  $^1H$  NMR (400 MHz,  $CF_3COOD$ )  $\delta$ = 9.95 (d,  $J$  = 8.3 Hz, 1H), 9.13 (d,  $J$  = 8.2 Hz, 1H), 9.05 (s, 1H), 8.74 (s, 1H), 6.43 (s, 1H), 5.78 (s, 6H), 5.56 (d,  $J$  = 12.3 Hz, 1H), 5.45-5.36 (dd,  $J$  = 29.6, 7.9 Hz, 2H), 5.18 (d, 2H), 4.85 (d, 2H), 4.66 (s, 1H),

3.95 (s, 1H), 3.64-3.55 (m, 5H), 3.21 (m, 1H). <sup>13</sup>C NMR (101 MHz, CF<sub>3</sub>COOD) δ 166.0, 165.9, 155.9, 155.6, 144.4, 140.1, 140.0, 132.0, 123.4, 121.9, 121.7, 118.0, 113.3, 111.6, 70.5, 64.9, 59.9, 59.6, 59.4, 56.7, 43.0, 32.4, 26.0, 25.8, 24.1. ESI-HRMS *m/z*: calcd. C<sub>24</sub>H<sub>26</sub>NO<sub>7</sub>[M+H]<sup>+</sup> 440.1703, found 440.1694.

*1-(2-hydroxy-3-(piperazin-1-yl)propyl)-3,8-dimethoxychromeno[5,4,3-cde]chromene-5,10-dione (Y13)*. Yield 35%. <sup>1</sup>H NMR (400 MHz, CF<sub>3</sub>COOD) δ= 9.88 (d, *J* = 8.1 Hz, 1H), 9.03 (d, *J* = 8.0 Hz, 1H), 8.92 (s, 1H), 6.39 (s, 1H), 5.75-5.72 (m, 2H), 5.66 (s, 6H), 5.57-5.41 (m, 8H), 5.30 (s, 2H), 4.80 (s, 1H). <sup>13</sup>C NMR (101 MHz, CF<sub>3</sub>COOD) δ 155.8, 155.5, 143.8, 139.9, 132.0, 123.3, 121.6, 119.4, 118.4, 117.8, 116.6, 115.6, 113.1, 111.4, 70.2, 65.3, 59.3, 59.2, 53.8, 51.7, 44.8, 42.6. ESI-HRMS *m/z*: calcd. C<sub>23</sub>H<sub>25</sub>N<sub>2</sub>O<sub>7</sub>[M+H]<sup>+</sup> 441.1656, found 441.1656.

*1-(2-hydroxy-3-(4-(2-hydroxyethyl)piperazin-1-yl)propyl)-3,8-dimethoxychromeno[5,4,3-cde]chromene-5,10-dione (Y14)*. Yield 26%. <sup>1</sup>H NMR (400 MHz, CF<sub>3</sub>COOD) δ= 9.91 (d, *J* = 8.0 Hz, 1H), 9.07 (d, *J* = 8.1 Hz, 1H), 8.95 (s, 1H), 6.42 (s, 1H), 5.84-5.79 (m, 8H), 5.71 (s, 6H), 5.57-5.47 (m, 5H), 5.21 (s, 2H), 4.86 (s, 1H). <sup>13</sup>C NMR (101 MHz, CF<sub>3</sub>COOD) δ 165.7, 155.9, 155.5, 140.0, 132.0, 123.3, 121.6, 119.5, 118.5, 117.9, 116.7, 115.6, 113.1, 111.4, 70.2, 65.3, 62.4, 59.4, 59.2, 58.5, 54.3, 53.1, 53.0, 52.3, 42.7. HRMS *m/z*: calcd. C<sub>25</sub>H<sub>29</sub>N<sub>2</sub>O<sub>9</sub>[M+H]<sup>+</sup> 485.1918, found 485.1914..

*1-(3-(cyclohexylamino)-2-hydroxypropyl)-3,8-dimethoxychromeno[5,4,3-cde]chromene-5,10-dione (Y15)*. Yield 45%. <sup>1</sup>H NMR (400 MHz, MeOD) δ= 8.10 (d, *J* = 8.7 Hz, 1H), 7.51 (d, *J* = 8.8 Hz, 1H), 7.37 (s, 1H), 4.25-4.11 (m, *J* = 11.0, 3.8 Hz, 1H), 4.12 (s, 3H), 4.11 (s, 3H), 3.75-3.71 (dd, *J* = 12.9, 4.1 Hz, 1H), 3.28-3.25 (dd, 1H), 3.16-3.10 (dd, *J* = 12.6, 9.2, 3.9 Hz, 3H), 2.18 (d, *J* = 6.0 Hz, 1H), 2.09 (d, *J* = 7.5 Hz, 1H), 1.88 (dd, *J* = 10.9 Hz, 2H), 1.72 (d, *J* = 11.2 Hz, 1H), 1.46-1.34 (m, 4H), 1.27-1.21 (m, 1H). <sup>13</sup>C NMR (101 MHz, CF<sub>3</sub>COOD) δ 161.7, 154.5, 154.2, 142.7, 138.7, 130.7, 122.1, 121.0, 117.1, 116.5, 115.3, 114.3, 112.5, 112.4, 71.5, 58.2, 57.9, 41.4, 31.0, 25.7, 25.5, 25.4. ESI-HRMS *m/z*: calcd. C<sub>25</sub>H<sub>28</sub>NO<sub>7</sub>[M+H]<sup>+</sup> 454.1860, found 454.1849.

*2-(3,8-dimethoxy-5,10-dioxo-5,10-dihydrochromeno[5,4,3-cde]chromen-1-yl)acetic acid (Y16)*. To a suspension of Y5 (50 mg, 0.15 mmol) in a mixture of CH<sub>2</sub>Cl<sub>2</sub>, H<sub>2</sub>O, and *t*-BuOH (10 mL, 3:1:1) was added NaH<sub>2</sub>PO<sub>4</sub> (11 mg, 0.07 mmol), NaClO<sub>2</sub>(27 mg, 0.3



mmol) and H<sub>2</sub>O<sub>2</sub> (47 μL, 0.45 mmol). The mixture was stirred at room temperature for 4h. The organic solvent was removed under vacuum and the residue was filtered. The solid was purified by column chromatography (CH<sub>2</sub>Cl<sub>2</sub>: MeOH = 10:1) to Y16 (15 mg, 50%) as a white solid. <sup>1</sup>H NMR (400 MHz, CDCl<sub>3</sub>): δ = 8.05 (d, *J* = 8.7 Hz, 1 H), 7.56 (d, *J* = 8.7 Hz, 1 H), 7.54 (s, 1 H), 4.15 (s, 2 H), 4.05 (s, 6H). <sup>13</sup>C NMR (101MHz, CF<sub>3</sub>COOD): δ = 181.0, 166.1, 165.8, 155.9, 155.5, 140.1, 140.0, 131.9, 123.1, 121.7, 121.4, 117.8, 113.2, 112.1, 59.3, 59.2, 43.3. ESI-HRMS *m/z*: calcd. C<sub>18</sub>H<sub>11</sub>O<sub>8</sub>[M+H]<sup>+</sup> 355.0604, found 355.0601.

General procedure for synthesis of compounds Y17-Y122.

Step 1. Compound Y16 was added in SOCl<sub>2</sub> and stirred for 4 h at 76 °C. The SOCl<sub>2</sub> was removed under vacuum, and the crude products proceed directly to the next step. Step 2. The crude products obtained above was dissolve in CH<sub>2</sub>Cl<sub>2</sub>. Different aliphatic amines were added in and stirred for 3 h at 45°C. The organic solvent was removed under vacuum and the residue was purified by column chromatography (CH<sub>2</sub>Cl<sub>2</sub>: MeOH) to give product Y17-Y122.

*2-(3,8-dimethoxy-5,10-dioxo-5,10-dihydrochromeno[5,4,3-cde]chromen-1-yl)-N,N-dimethylacetamide(Y17)*. Yield 20%. <sup>1</sup>H NMR (400 MHz, CDCl<sub>3</sub>) δ= 8.24 (d, *J* = 8.7 Hz, 1H), 7.35 (d, *J* = 8.7 Hz, 1H), 7.18 (s, 1H), 4.11 (s, 8H), 3.22 (s, 3H), 2.83 (s, 3H) <sup>13</sup>C NMR (101 MHz, CDCl<sub>3</sub>) δ 171.7, 168.4, 158.3, 156.8, 151.6, 137.9, 137.4, 127.4, 118.6, 117.9, 114.2, 112.3, 111.6, 107.8, 56.8, 56.6, 38.0, 34.9. ESI-HRMS *m/z*: calcd. C<sub>20</sub>H<sub>18</sub>NO<sub>7</sub>[M+Na]<sup>+</sup> 408.0523, found 408.0521.

*3,8-dimethoxy-1-(2-oxo-2-(piperidin-1-yl)ethyl)chromeno[5,4,3-cde]chromene-5,10-dione (Y18)*. Yield 23%. <sup>1</sup>H NMR (400 MHz, CDCl<sub>3</sub>) δ= 8.22 (d, *J* = 8.4 Hz, 1H), 7.33 (d, *J* = 8.4 Hz, 1H), 7.10 (s, 1H), 4.47 (s, 2H), 4.09 (s, 6H), 3.49-3.43 (d, 2H), 2.05-2.00 (m, 2H), 1.83-1.67 (m, 4H), 1.46 (s, 2H). <sup>13</sup>C NMR (101 MHz, CDCl<sub>3</sub>) δ 158.6, 151.6, 151.6, 156.8, 151.6, 143.0, 137.6, 127.5, 114.3, 114.0, 112.2, 111.8, 111.7, 105.6, 57.0, 56.8, 52.7, 49.7, 25.9, 24.9, 24.1. ESI-HRMS *m/z*: calcd. C<sub>23</sub>H<sub>22</sub>NO<sub>7</sub>[M+H]<sup>+</sup> 426.1004, found 426.1005.

*N-cyclohexyl-2-(3,8-dimethoxy-5,10-dioxo-5,10-dihydrochromeno[5,4,3-cde]chromen-1-yl)acetamide (Y19)*. Yield 27%. <sup>1</sup>H NMR (400 MHz, CF<sub>3</sub>COOD) δ= 9.22 (d, *J* = 8.6 Hz,

1H), 9.05 (d,  $J = 8.6$  Hz, 1H), 9.03 (s, 1H), 5.66 (d, 8H), 3.69 (d,  $J = 7.9$  Hz, 2H), 3.36 (d,  $J = 10.0$  Hz, 2H), 3.23 (d,  $J = 12.4$  Hz, 1H), 3.03-2.89 (m,  $J = 11.5, 5$  Hz, 5H), 2.79-2.74 (m, 1H).  $^{13}\text{C}$  NMR (101 MHz,  $\text{CF}_3\text{COOD}$ )  $\delta$  173.8, 156.2, 155.6, 141.9, 140.1, 135.2, 132.4, 122.7, 120.7, 119.4, 118.4, 117.4, 116.6, 115.6, 113.2, 110.7, 59.7, 59.3, 55.9, 34.3, 27.4, 27.0. ESI-HRMS  $m/z$ : calcd.  $\text{C}_{24}\text{H}_{24}\text{NO}_7[\text{M}+\text{H}]^+$  438.1547, found 438.1544.

*2-(3,8-dimethoxy-5,10-dioxo-5,10-dihydrochromeno[5,4,3-cde]chromen-1-yl)-N-(2-morpholinoethyl)acetamide (Y20)*. Yield 31%.  $^1\text{H}$  NMR (400 MHz,  $\text{CF}_3\text{COOD}$ )  $\delta$ = 9.97 (d,  $J = 8.5$  Hz, 1H), 9.13 (d,  $J = 8.5$  Hz, 1H), 8.95 (s, 1H), 6.11 (s, 2H), 5.97 (d,  $J = 13.3$  Hz, 2H), 5.77-5.72 (m, 12H), 5.31 (s, 2H), 5.05-5.00 (t,  $J = 11.6$  Hz, 2H).  $^{13}\text{C}$  NMR (101 MHz,  $\text{CF}_3\text{COOD}$ )  $\delta$  162.8, 155.8, 155.7, 145.5, 141.0, 140.3, 132.2, 122.5, 121.2, 119.5, 118.4, 118.1, 116.7, 115.6, 113.5, 108.6, 67.5, 62.4, 59.5, 59.3, 57.2, 41.8. ESI-HRMS  $m/z$ : calcd.  $\text{C}_{24}\text{H}_{25}\text{N}_2\text{O}_8[\text{M}+\text{H}]^+$  471.1218, found 471.1211

*N-butyl-2-(3,8-dimethoxy-5,10-dioxo-5,10-dihydrochromeno[5,4,3-cde]chromen-1-yl)acetamide (Y21)*. Yield 25%.  $^1\text{H}$  NMR (400 MHz,  $\text{CF}_3\text{COOD}$ )  $\delta$ = 9.97 (d,  $J = 8.7$  Hz, 1H), 9.12 (d,  $J = 8.7$  Hz, 1H), 9.10 (s, 1H), 6.17 (s, 2H), 5.73 (s, 6H), 3.16-3.13 (m, 2H), 2.47-2.44 (m,  $J = 6.9$  Hz, 3H), 2.39-2.35 (m, 1H).  $^{13}\text{C}$  NMR (101 MHz,  $\text{CF}_3\text{COOD}$ )  $\delta$  163.9, 154.4, 154.3, 139.2, 138.3, 135.1, 130.7, 117.8, 116.8, 116.5, 115.0, 113.9, 112.2, 111.1, 110.3, 57.9, 57.6, 44.0, 40.8, 31.0, 20.68, 13.0. ESI-HRMS  $m/z$ : calcd.  $\text{C}_{22}\text{H}_{22}\text{NO}_7[\text{M}+\text{H}]^+$  386.0659, found 386.0681

*2-(3,8-dimethoxy-5,10-dioxo-5,10-dihydrochromeno[5,4,3-cde]chromen-1-yl)-N-phenylacetamide (Y22)*. Yield 20%.  $^1\text{H}$  NMR (400 MHz,  $\text{DMSO-d}_6$ )  $\delta$ = 11.99 (s, 1H), 8.16 (d,  $J = 8.5$  Hz, 1H), 7.96 (d,  $J = 7.8$  Hz, 2H), 7.65 (d,  $J = 8.5$  Hz, 1H), 7.57 (s, 1H), 7.49-7.46 (t,  $J = 7.5$  Hz, 2H), 7.31 (t,  $J = 7.2$  Hz, 1H).  $^{13}\text{C}$  NMR (101 MHz,  $\text{DMSO-d}_6$ )  $\delta$  194.9, 154.4, 158.2, 156.1, 150.9, 150.4, 143.7, 139.5, 137.2, 137.1, 128.6, 126.7, 126.3, 123.0, 117.7, 117.6, 115.0, 114.5, 111.2, 106.0, 57.1, 56.8. ESI-HRMS  $m/z$ : calcd.  $\text{C}_{24}\text{H}_{18}\text{NO}_7[\text{M}+\text{H}]^+$  432.1077, found 432.1075.

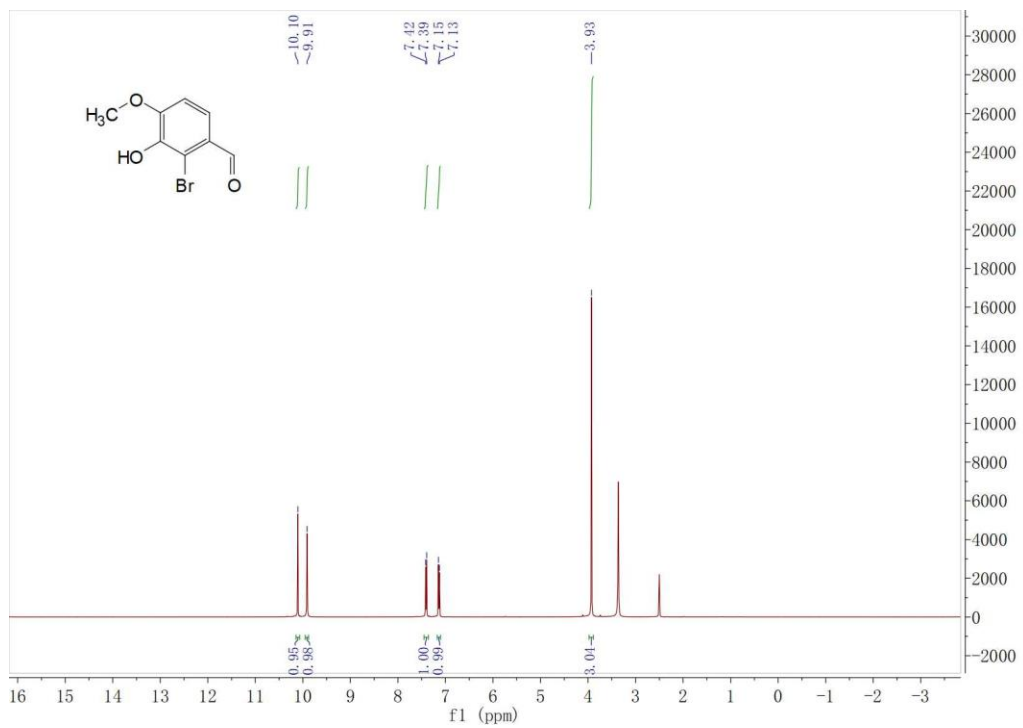

$^1\text{H}$  NMR spectrum (400 MHz,  $\text{DMSO}-d_6$ ) of compound 1

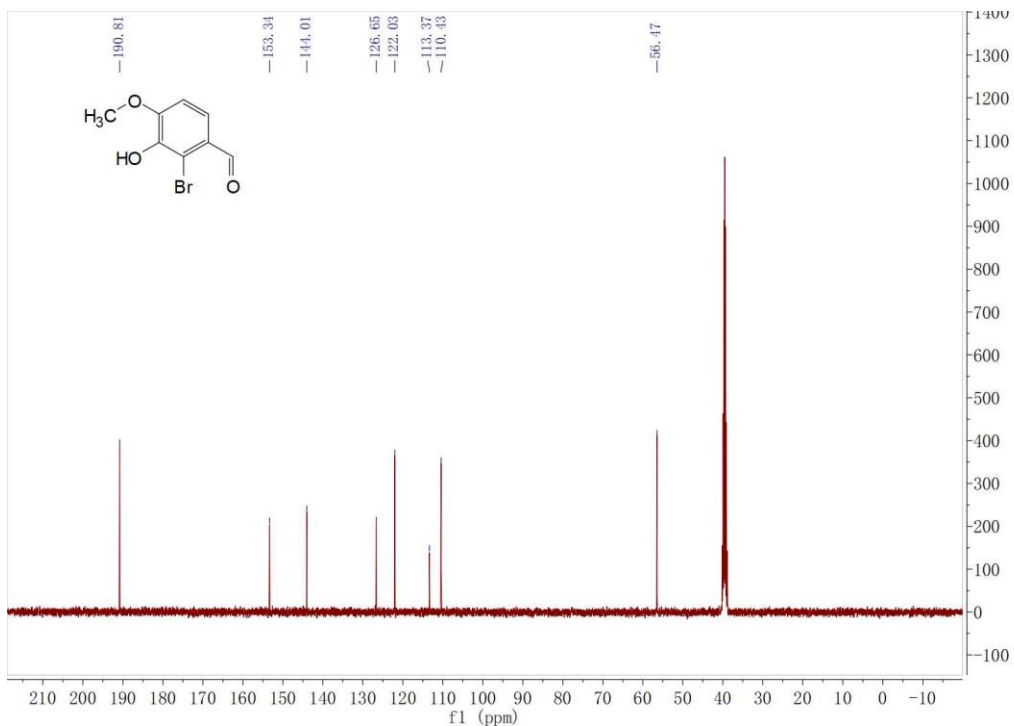

$^{13}\text{C}$  NMR spectrum (100 MHz,  $\text{DMSO}-d_6$ ) of compound 1

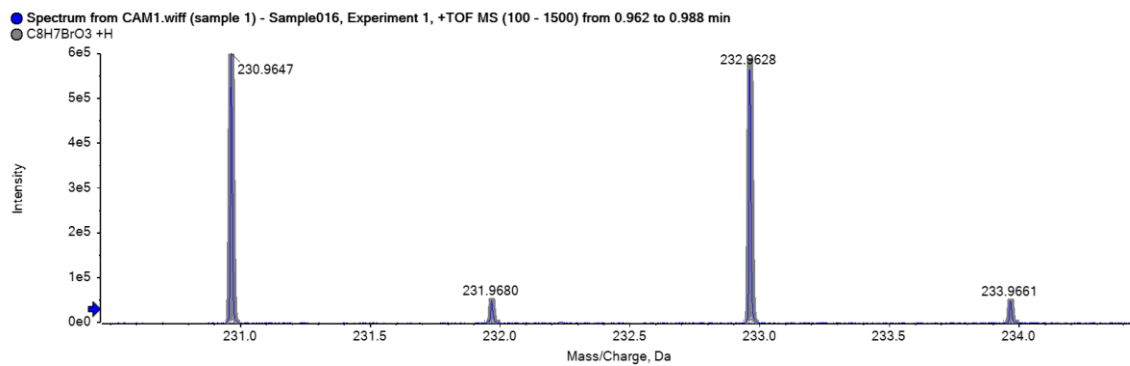

ESI-HRMS of compound 1

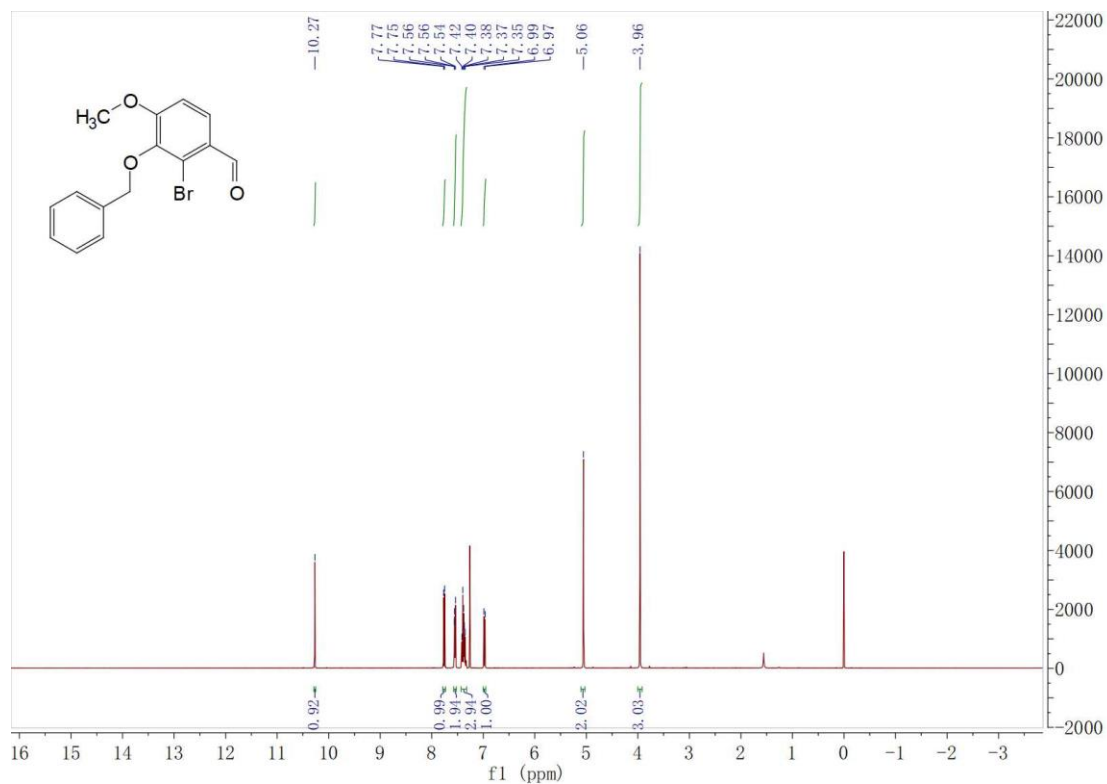

<sup>1</sup>H NMR spectrum (400 MHz, CDCl<sub>3</sub>) of compound 2

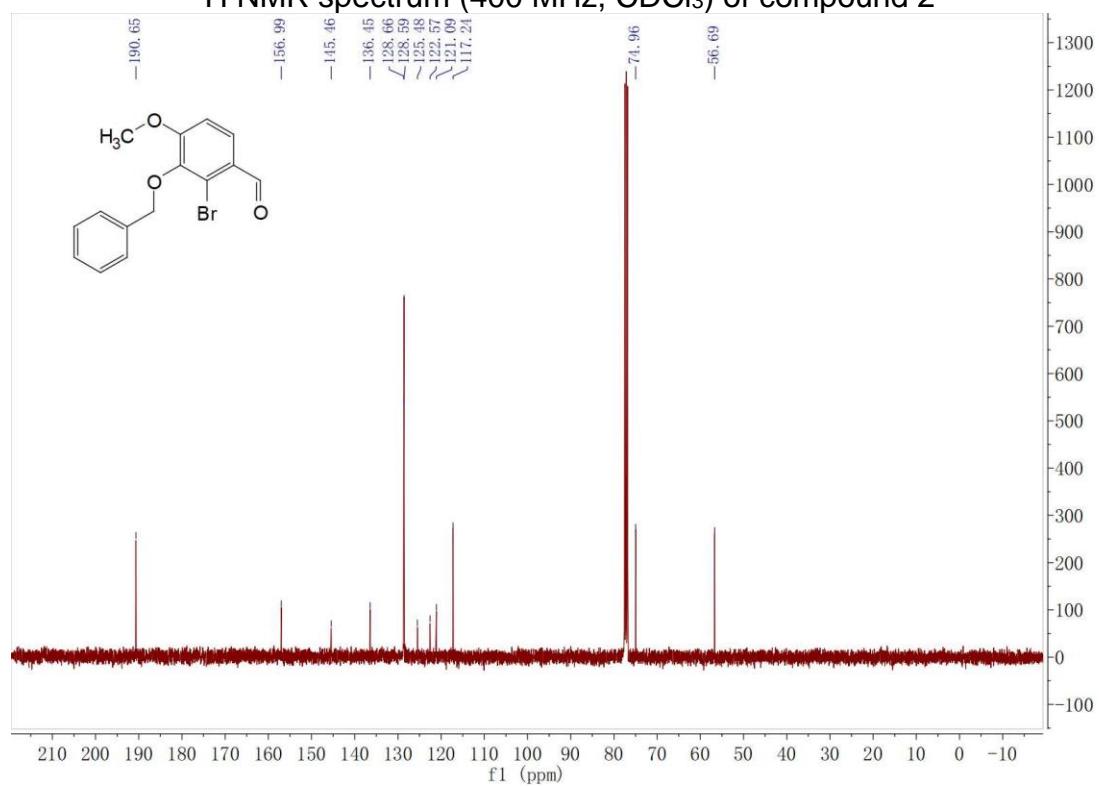

<sup>13</sup>C NMR spectrum (100 MHz, CDCl<sub>3</sub>) of compound 2

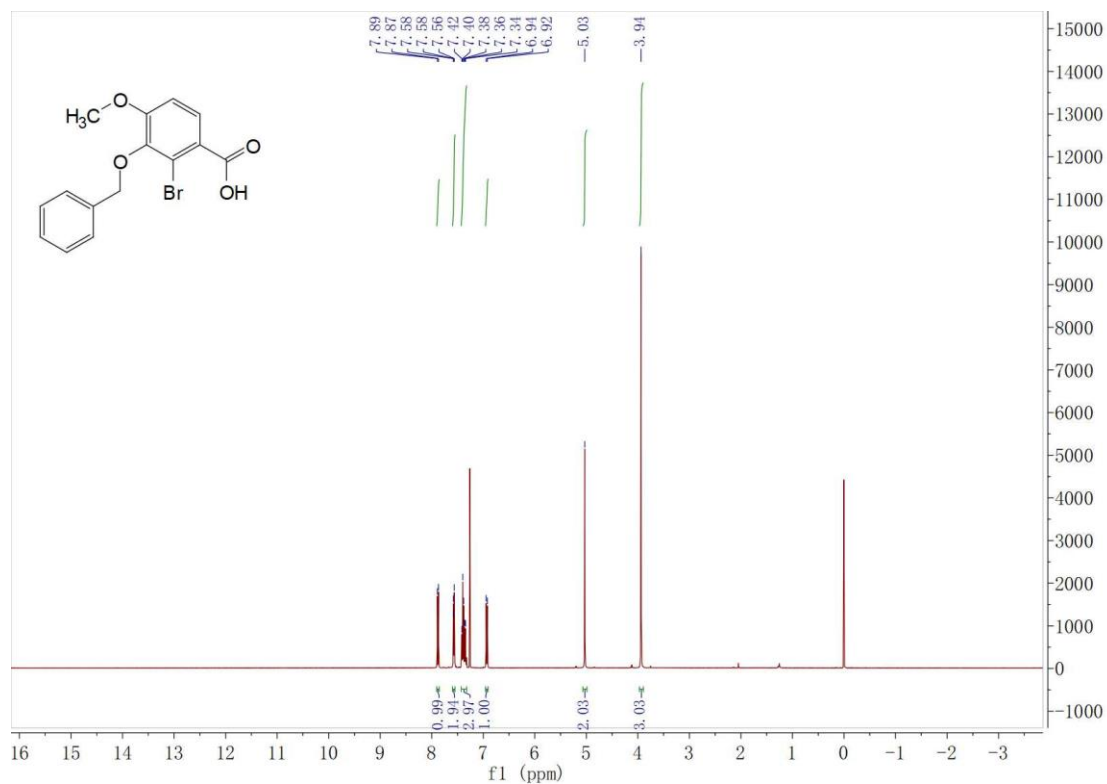

<sup>1</sup>H NMR spectrum (400 MHz, CDCl<sub>3</sub>) of compound 3

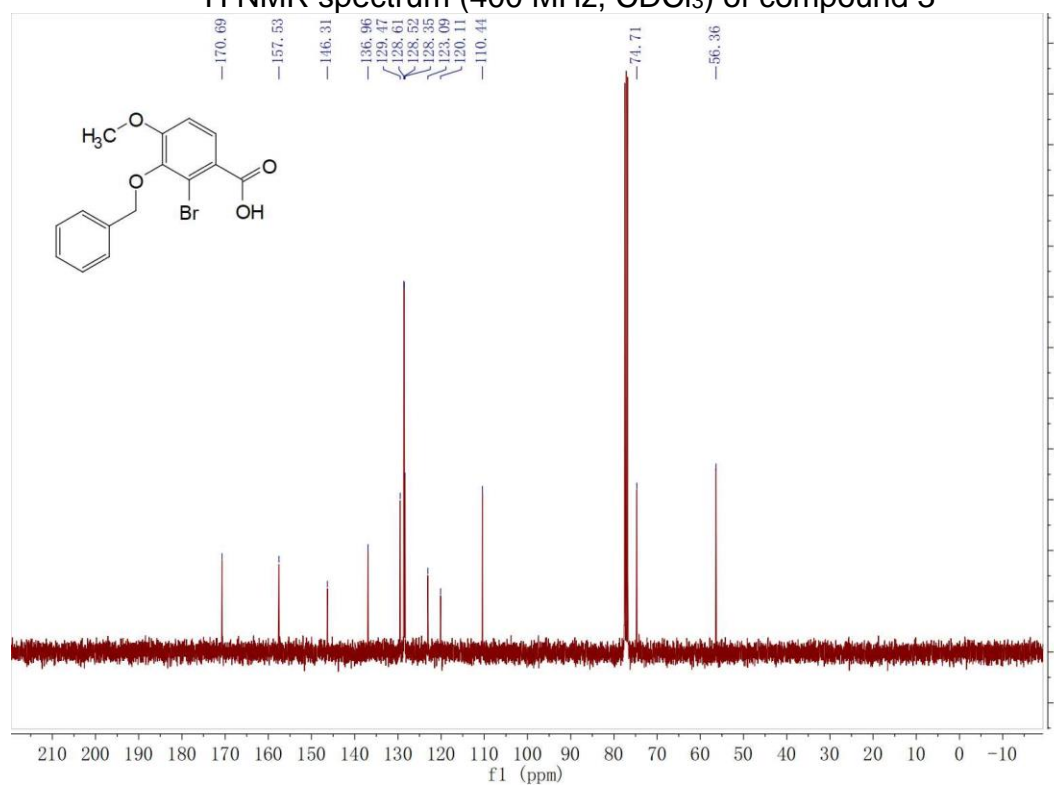

<sup>13</sup>C NMR spectrum (100 MHz, CDCl<sub>3</sub>) of compound 3

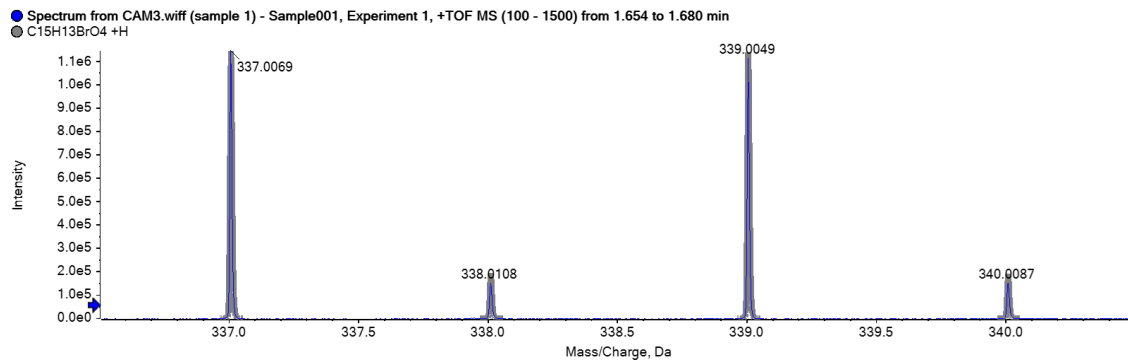

ESI-HRMS of compound 3

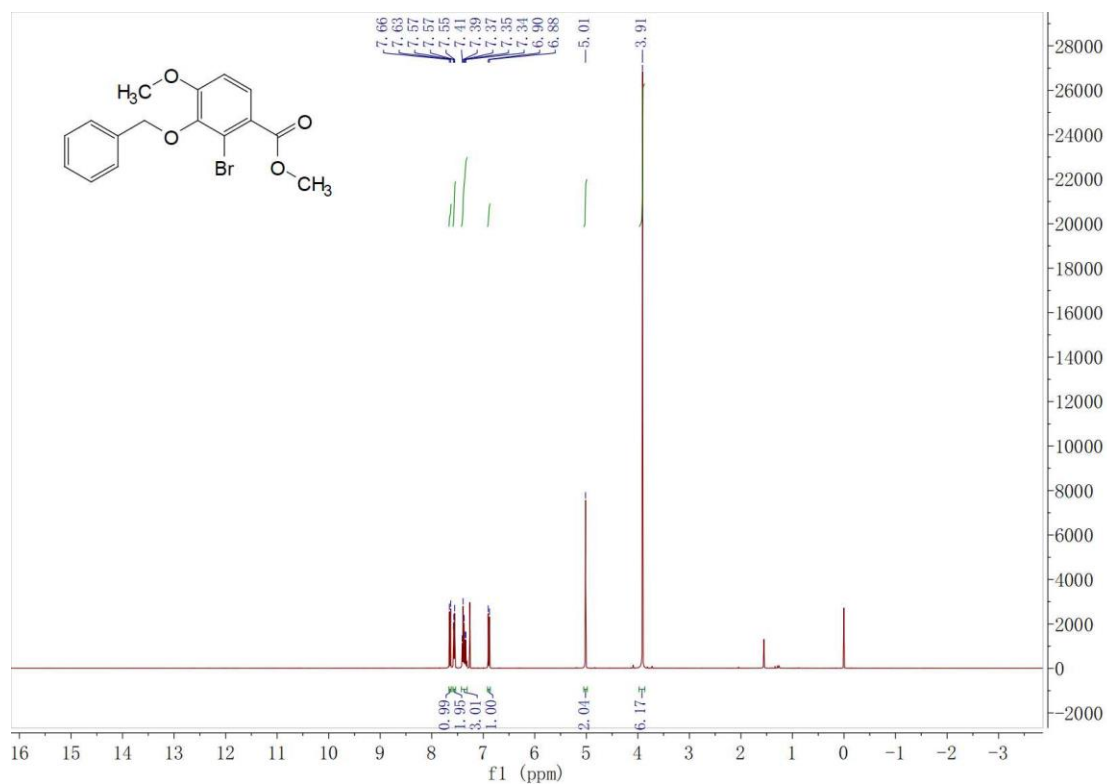

<sup>1</sup>H NMR spectrum (400 MHz, CDCl<sub>3</sub>) of compound 4

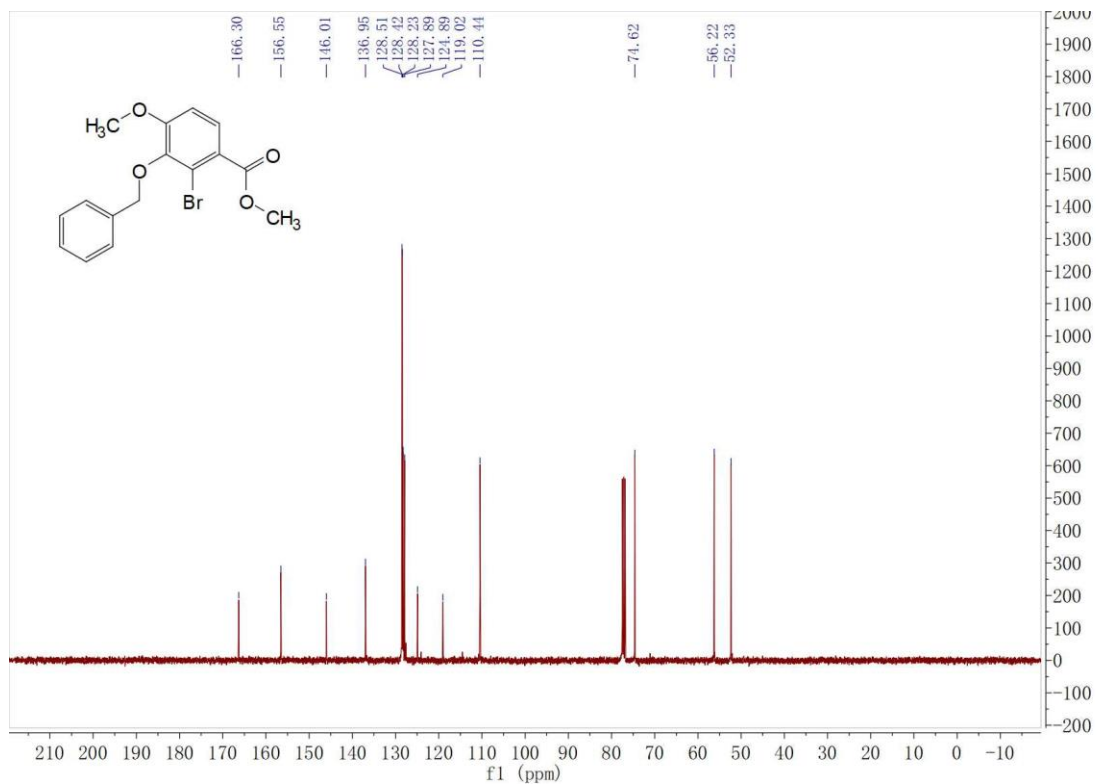

$^{13}\text{C}$  NMR spectrum (100 MHz,  $\text{CDCl}_3$ ) of compound 4

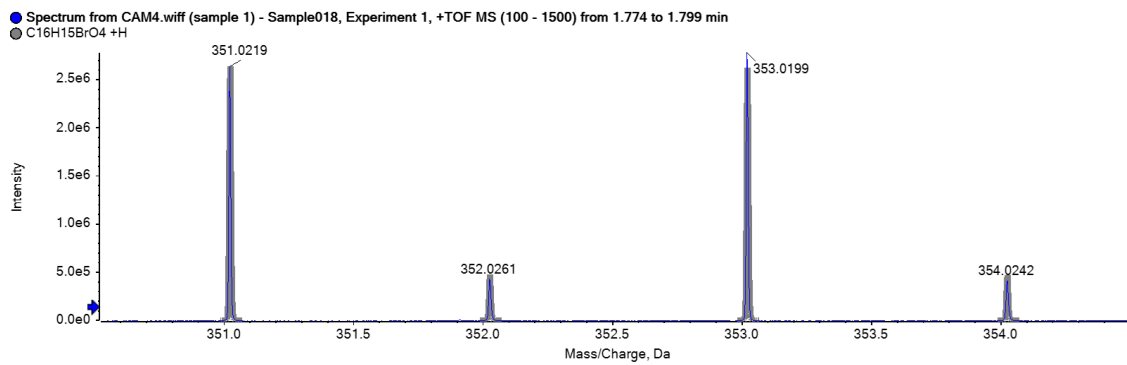

ESI-HRMS of compound 4



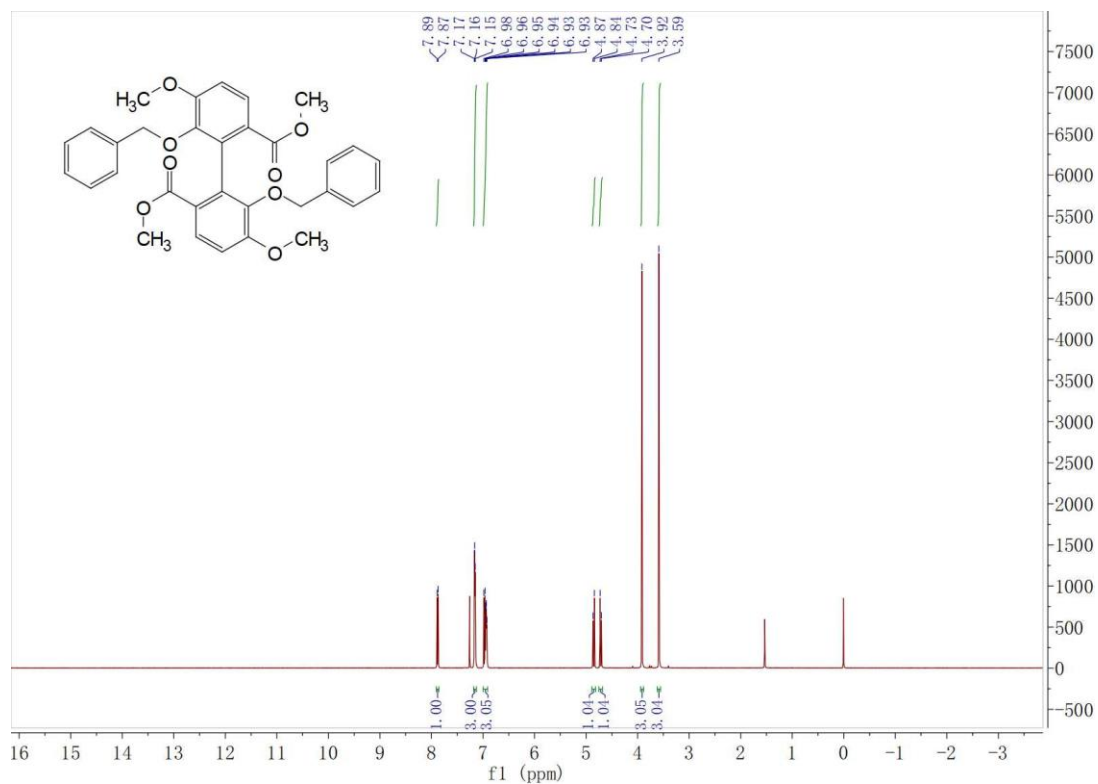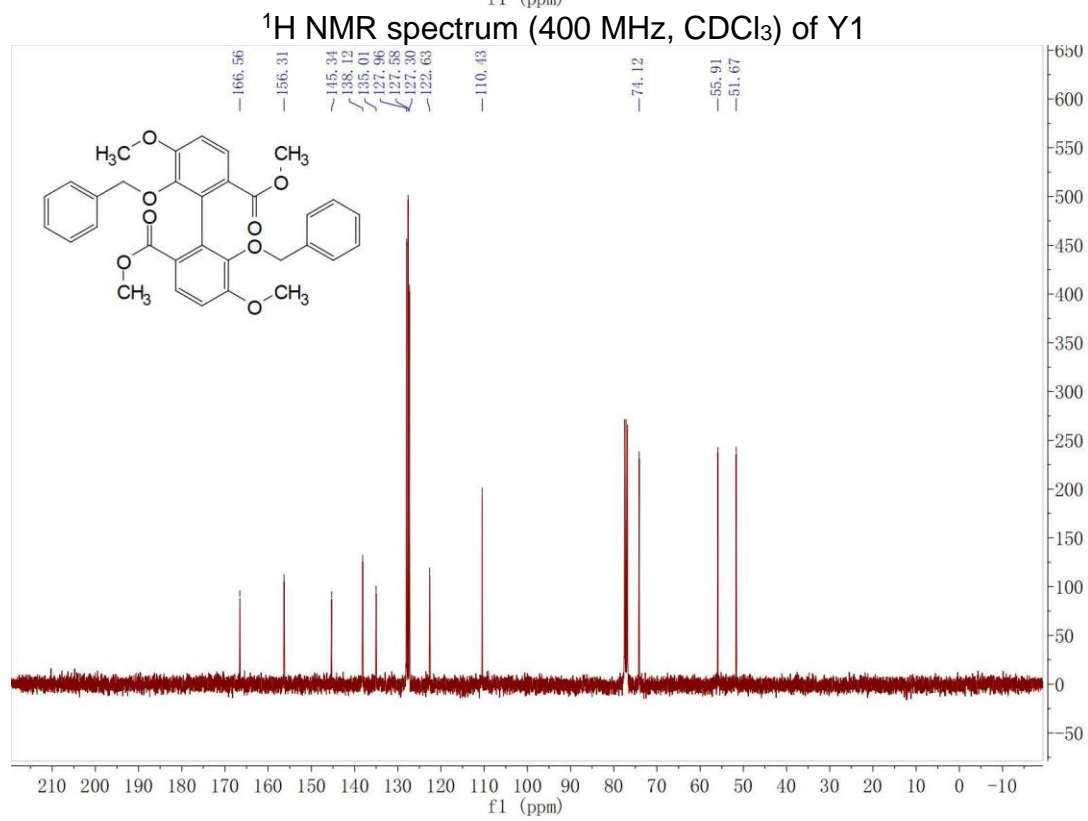

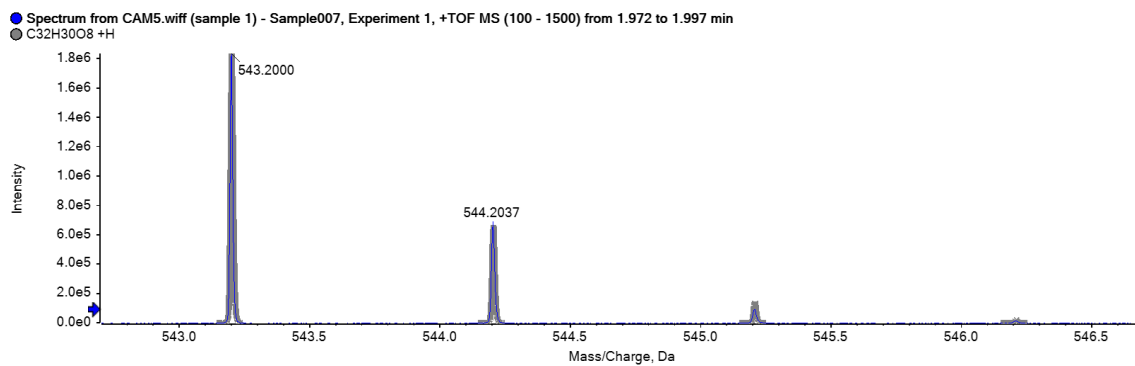

### ESI-HRMS of Y1

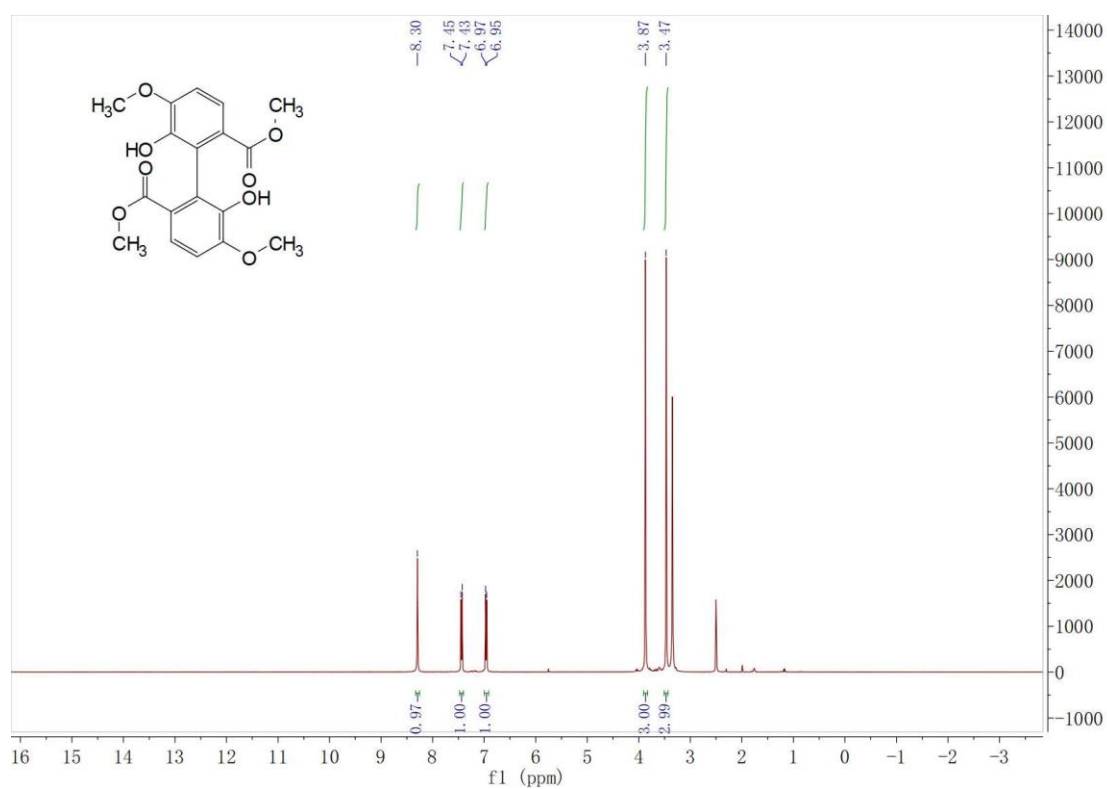

<sup>1</sup>H NMR spectrum (400 MHz, DMSO-*d*<sub>6</sub>) of Y2

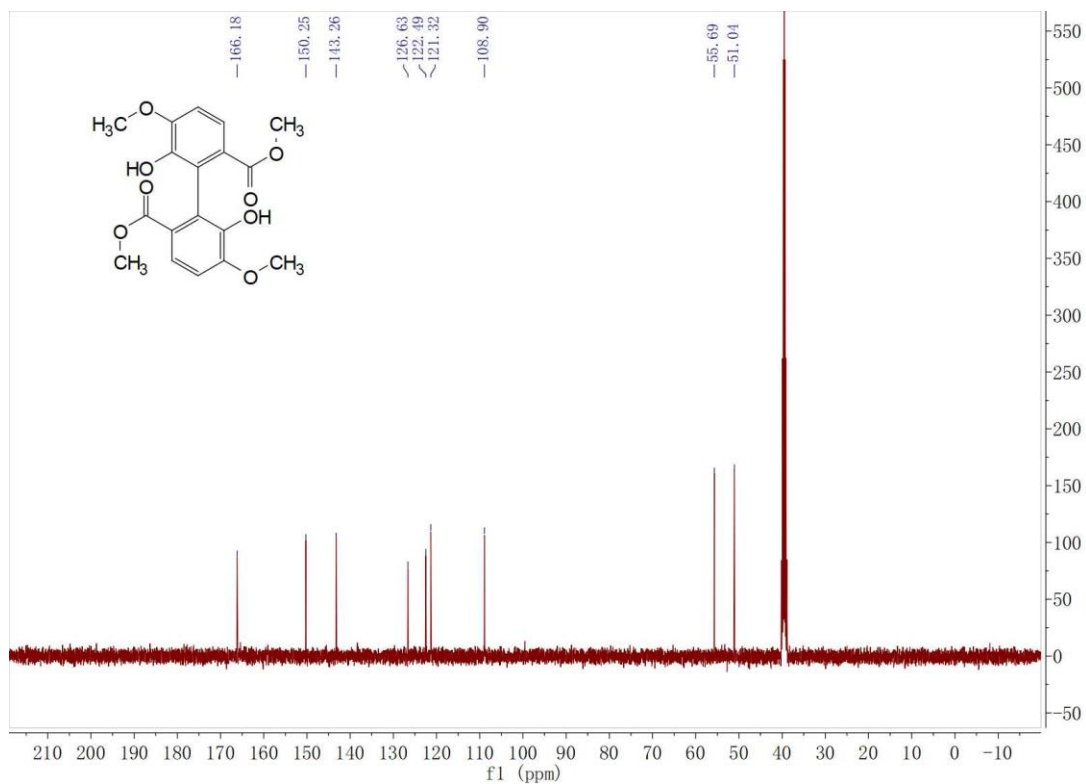

● Spectrum from CAM6.wiff (sample 1) - Sample002, Experiment 1, +TOF MS (100 - 1500) from 0.834 to 0.859 min

● C<sub>18</sub>H<sub>18</sub>O<sub>8</sub> +H

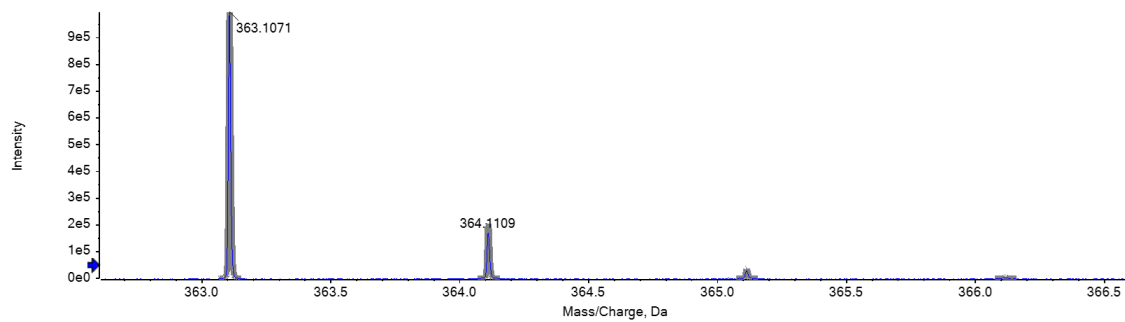

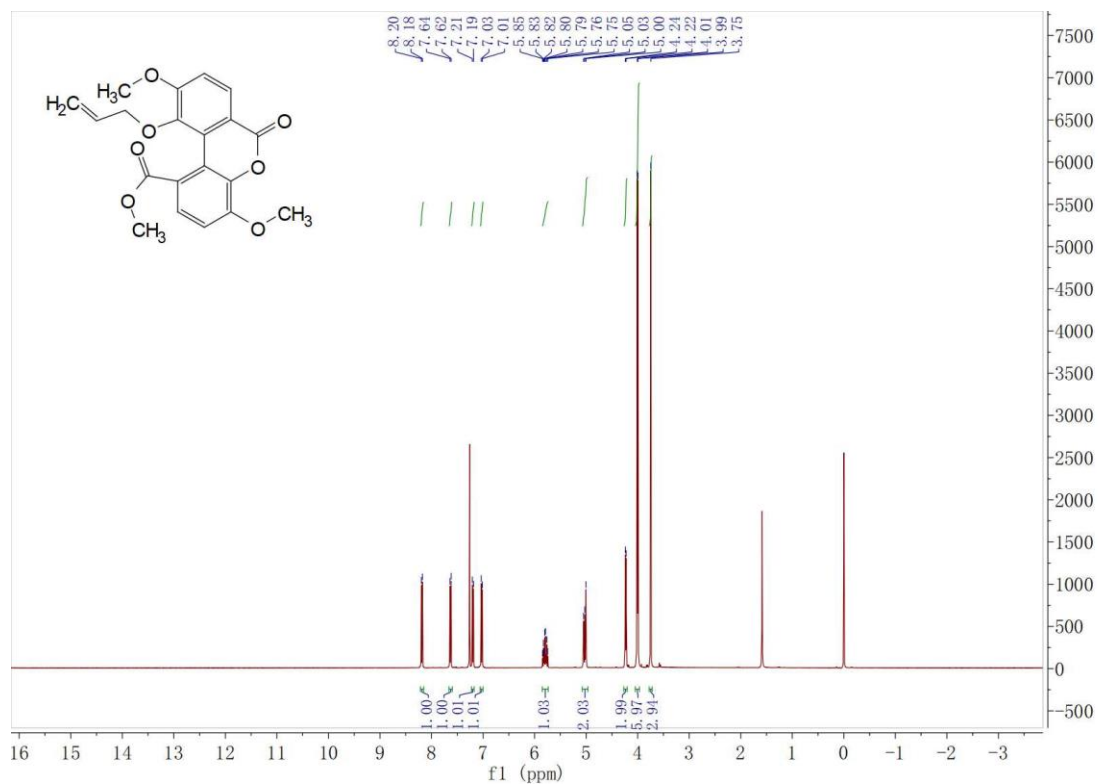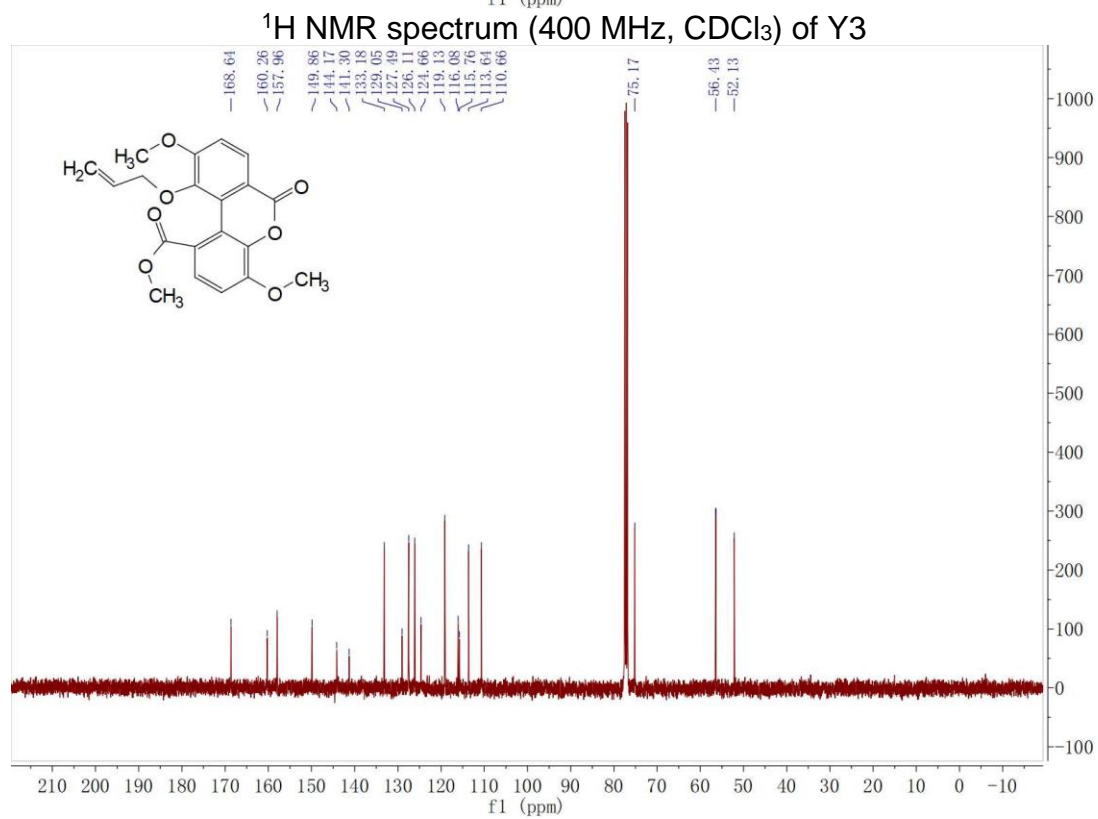

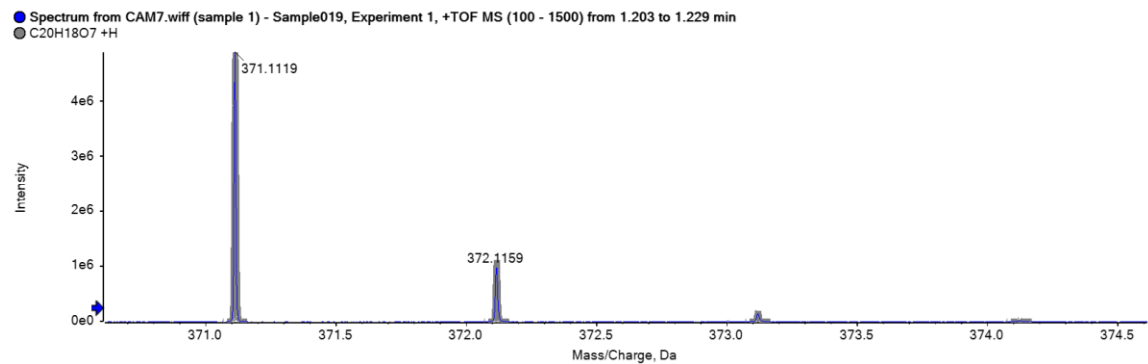

ESI-HRMS of Y3

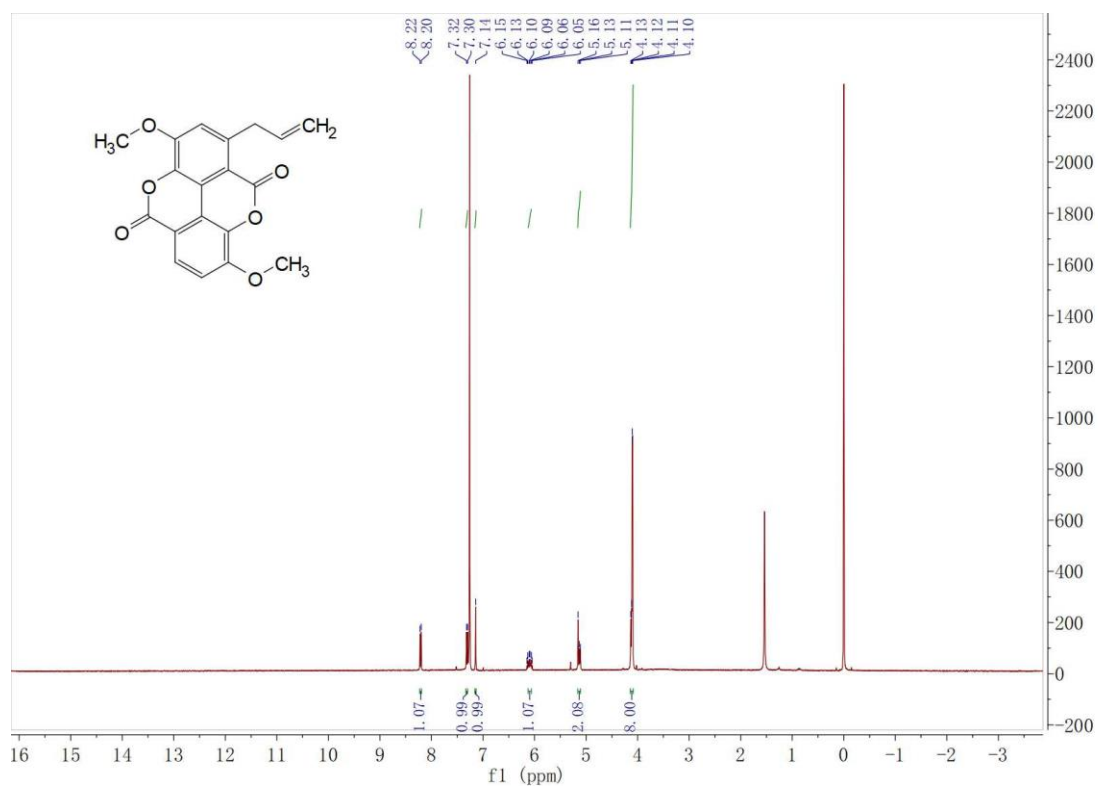

<sup>1</sup>H NMR spectrum (400 MHz, CDCl<sub>3</sub>) of Y4

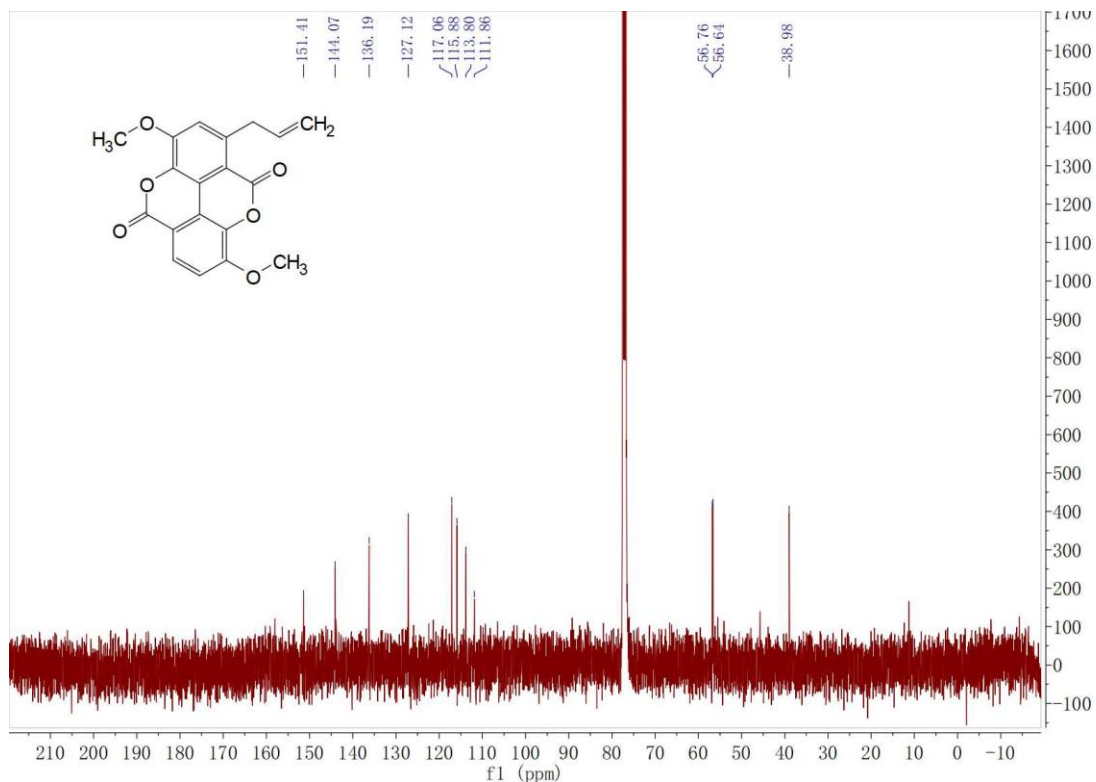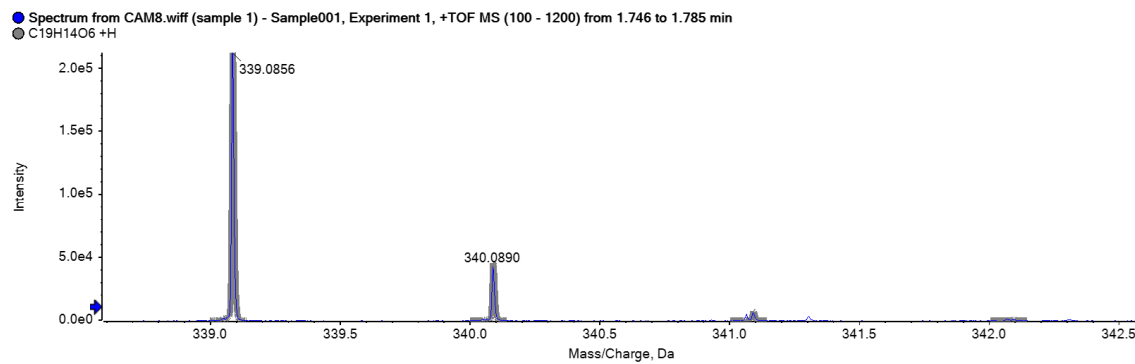

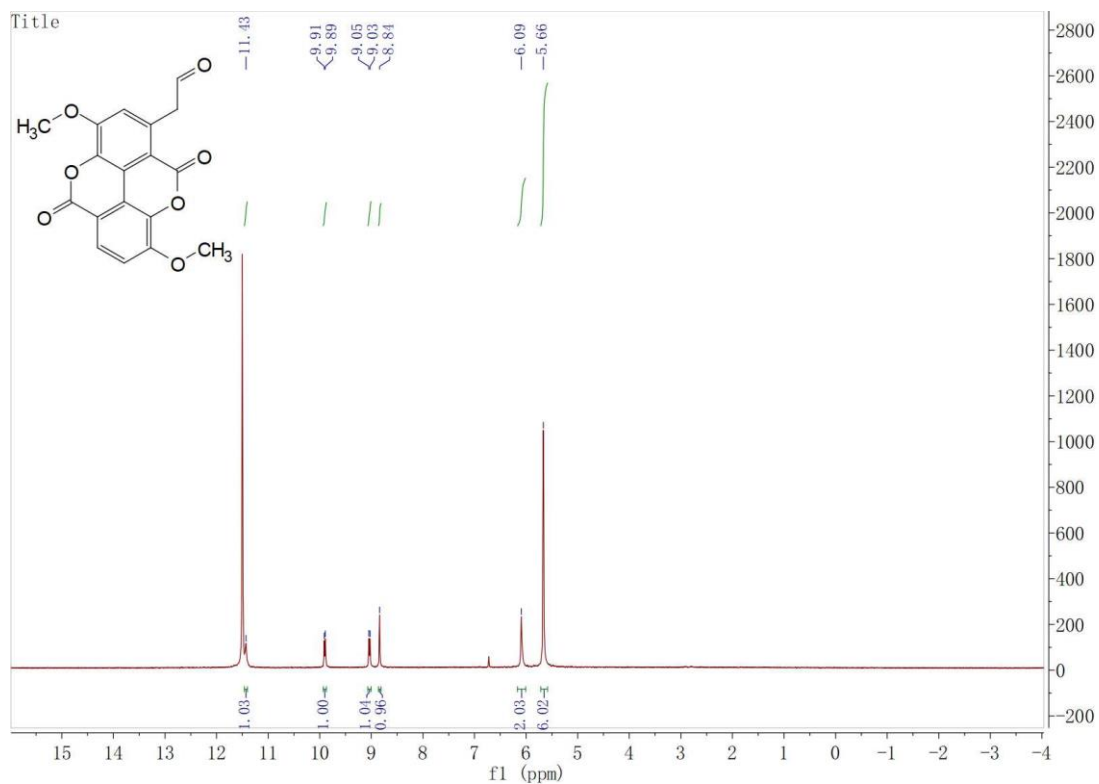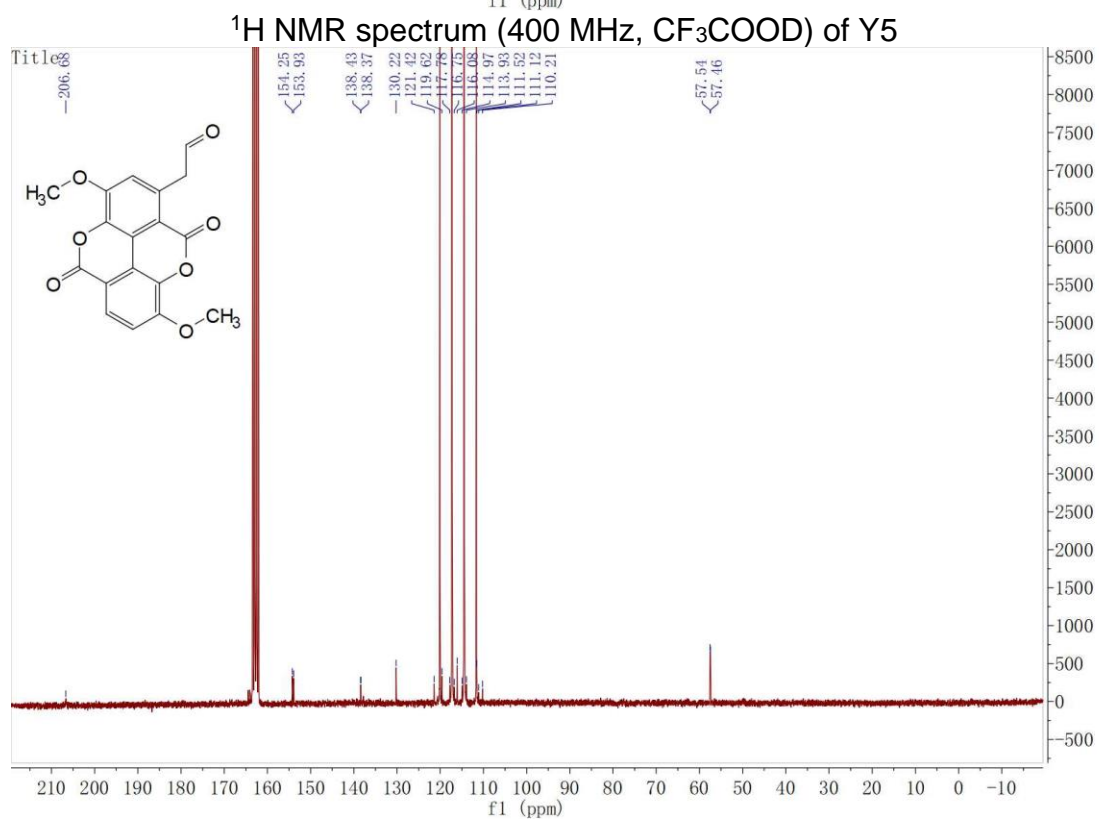

$^{13}\text{C NMR}$  spectrum (100 MHz,  $\text{CF}_3\text{COOD}$ ) of Y5

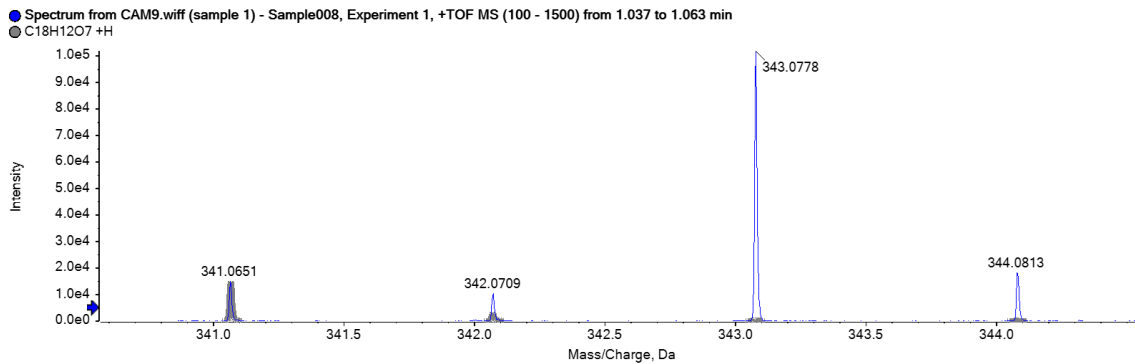

### ESI-HRMS of Y5

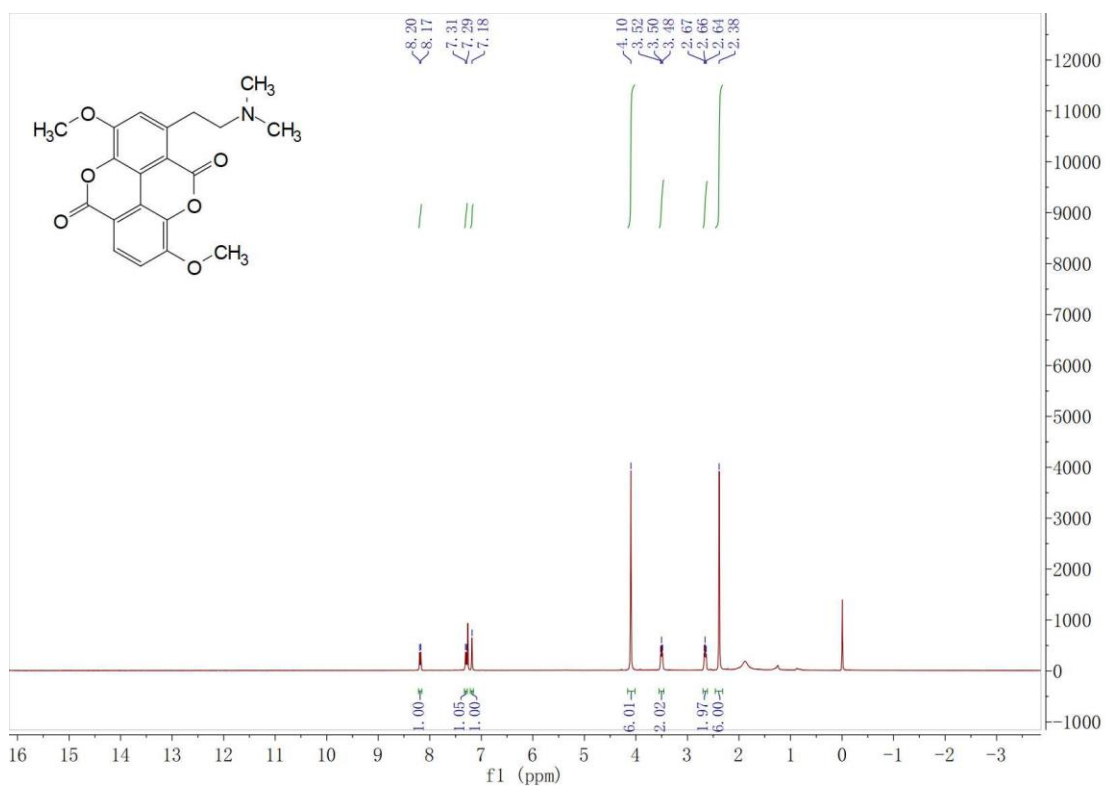

<sup>1</sup>H NMR spectrum (400 MHz, CDCl<sub>3</sub>) of compound Y6



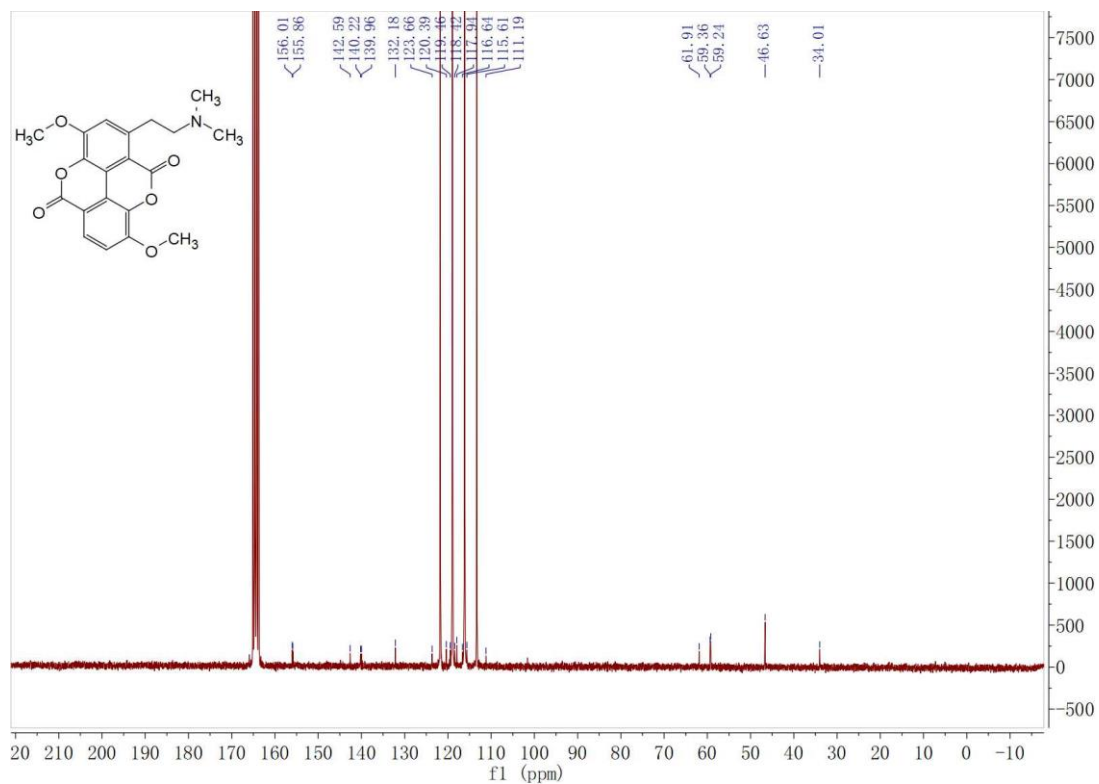

$^{13}\text{C}$  NMR spectrum (100 MHz,  $\text{CF}_3\text{COOD}$ ) of Y6

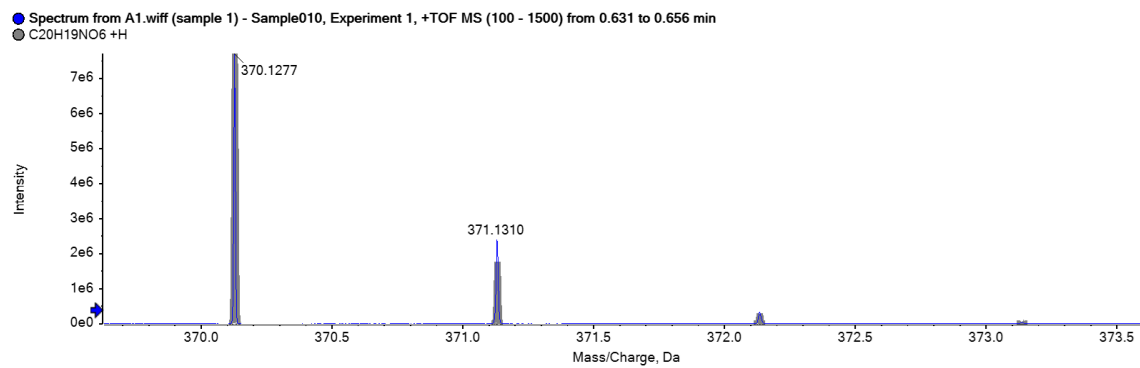

ESI-HRMS of Y6

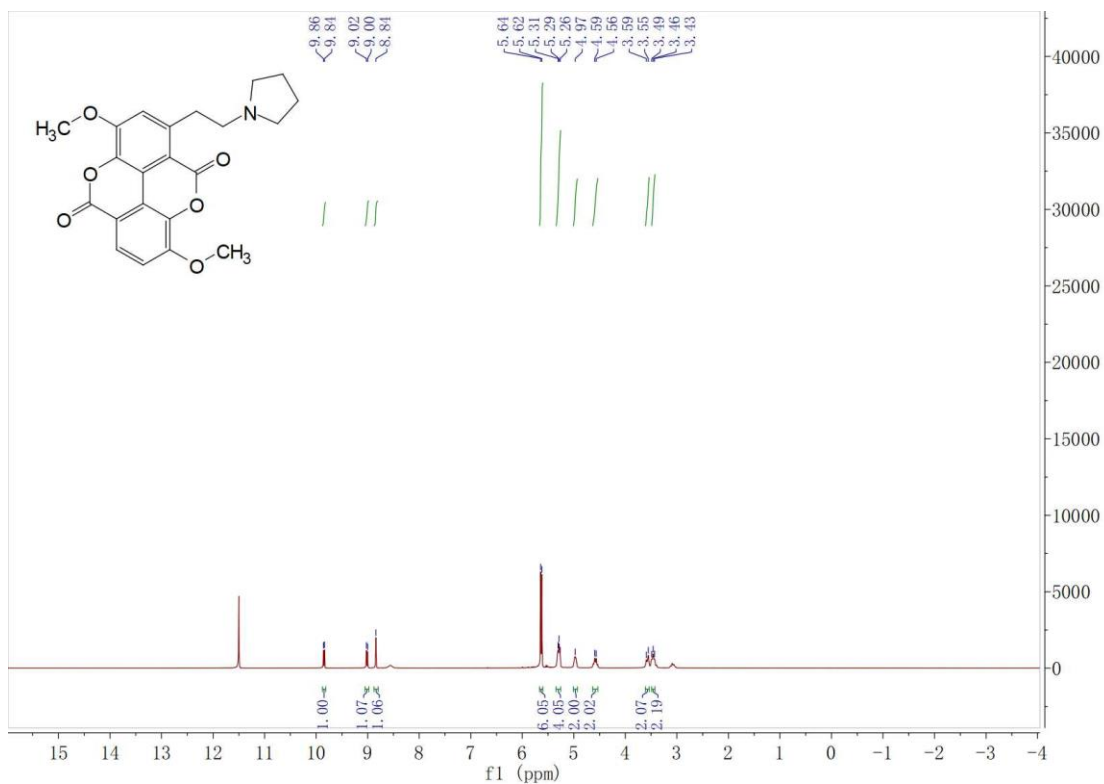

**<sup>1</sup>H NMR spectrum (400 MHz, CF<sub>3</sub>COOD) of Y7**

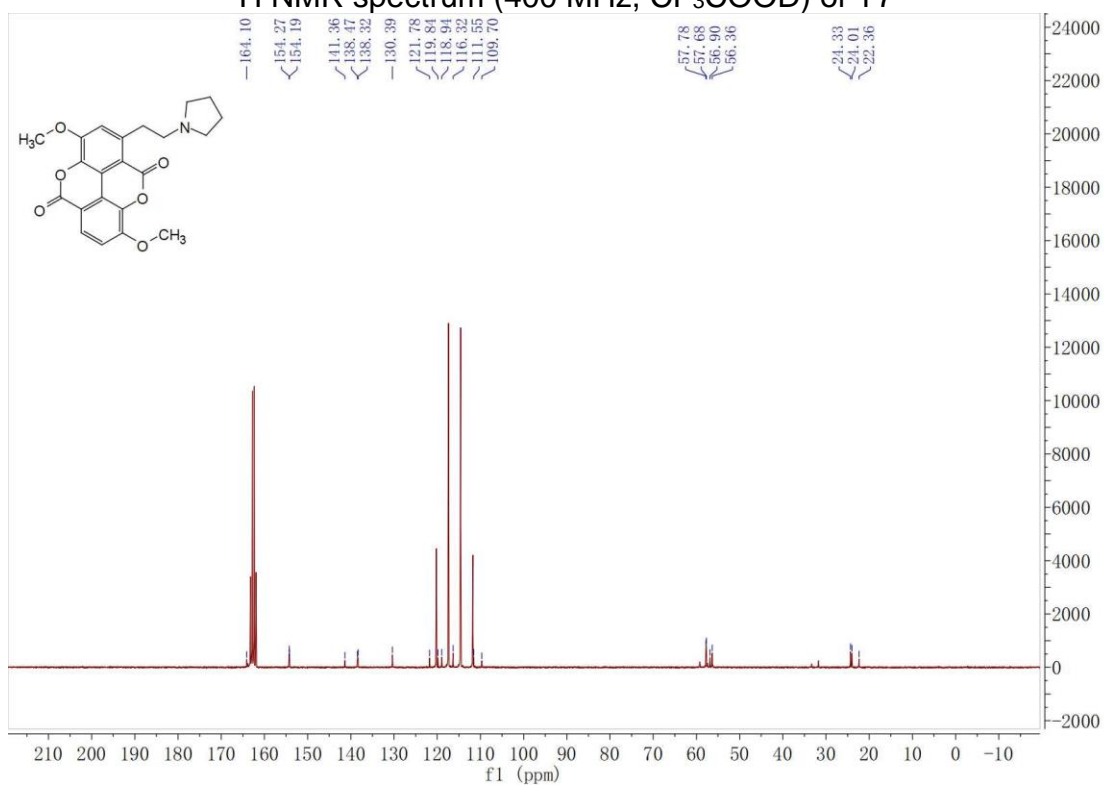

**<sup>13</sup>C NMR spectrum (100 MHz, CF<sub>3</sub>COOD) of Y7**

YJJ-a2 #23 RT: 0.12 AV: 1 NL: 5.39E8  
T: FTMS + pESI cv=0.00 Full ms [100.0000-1000.0000]

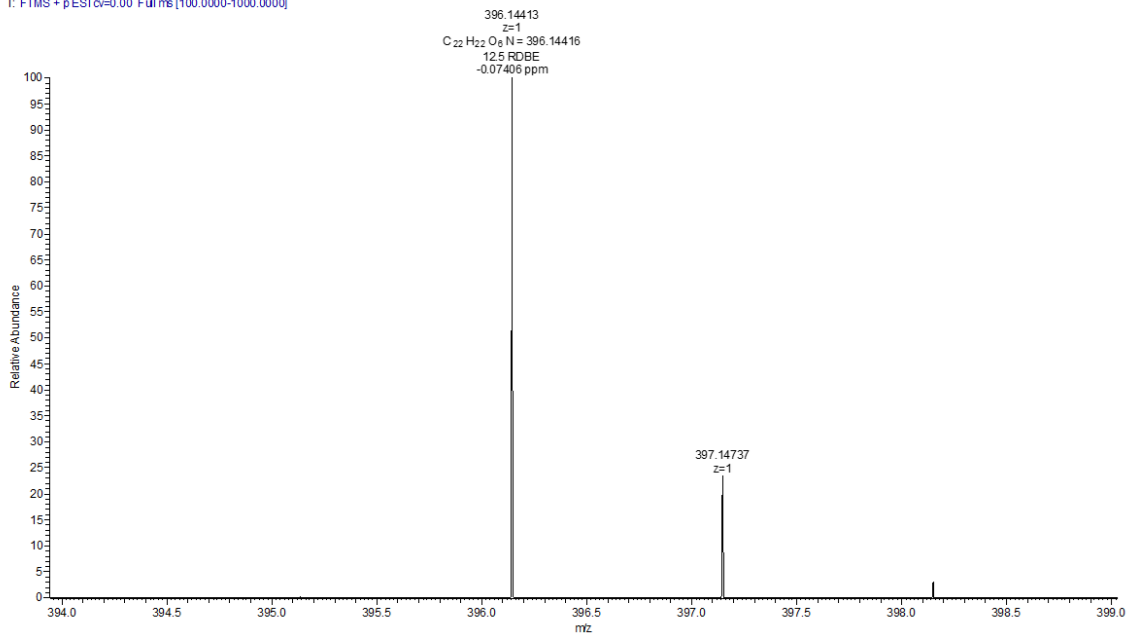

### ESI-HRMS of Y7

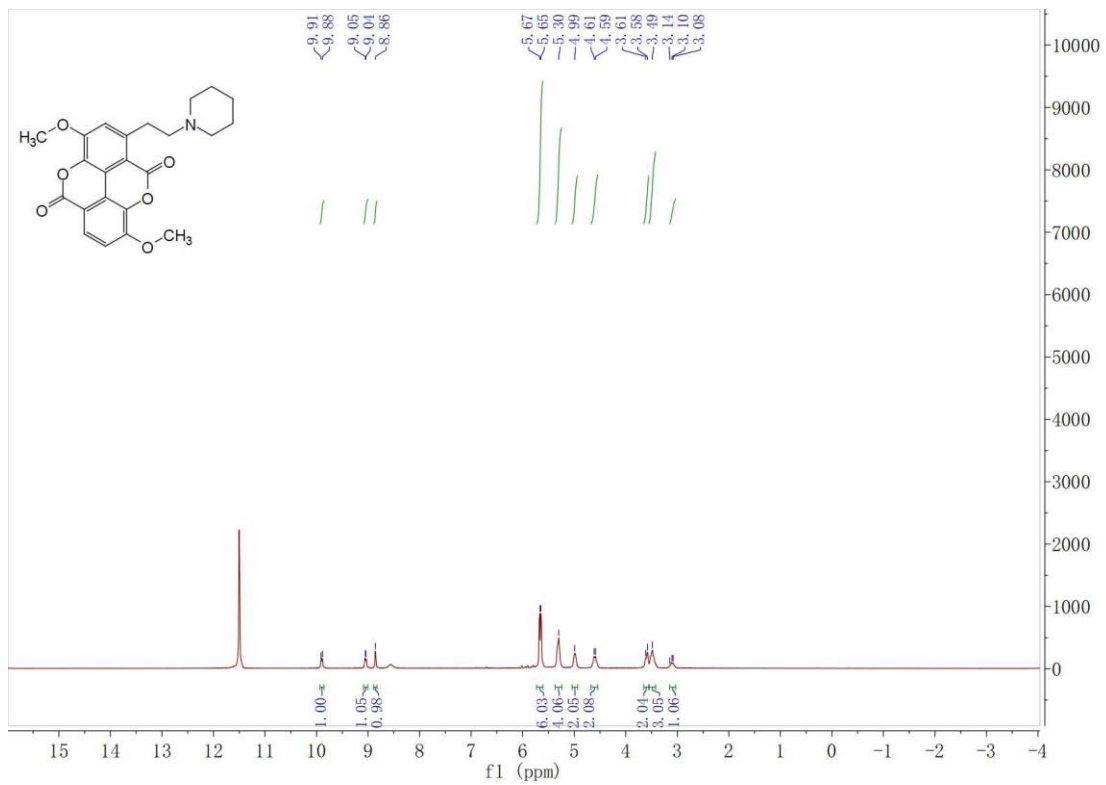

<sup>1</sup>H NMR spectrum (400 MHz, CF<sub>3</sub>COOD) of Y8

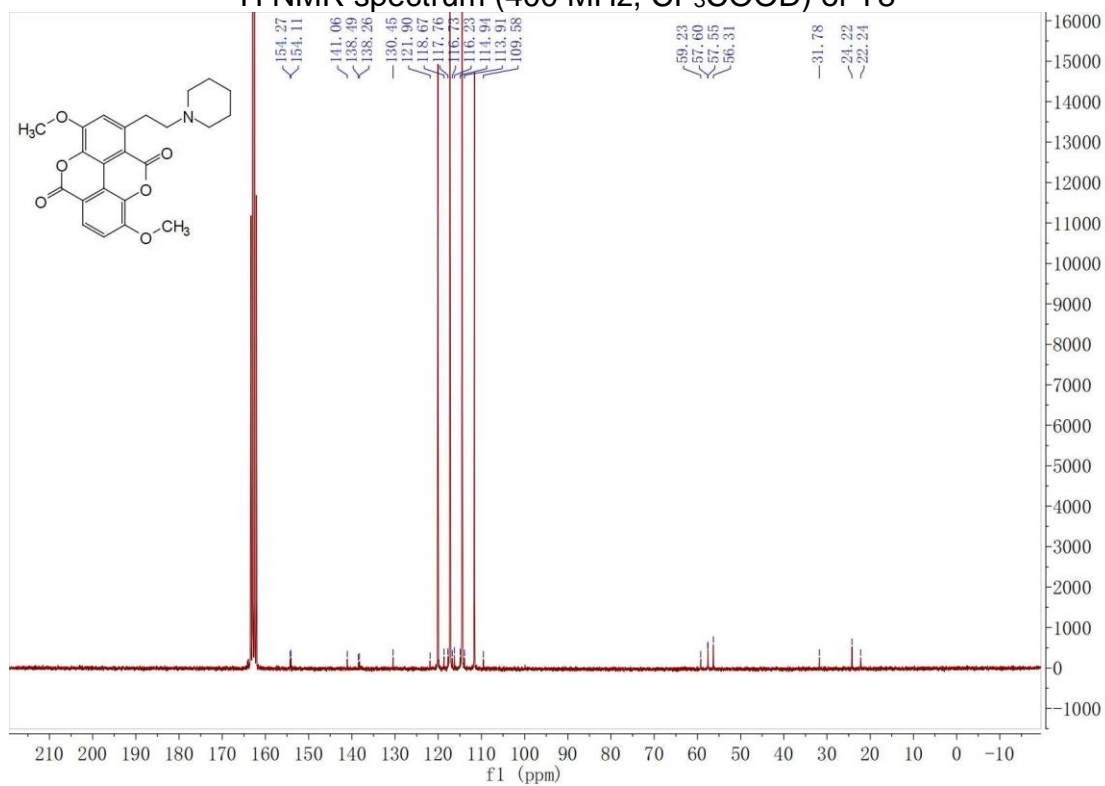

<sup>13</sup>C NMR spectrum (100 MHz, CF<sub>3</sub>COOD) of Y8

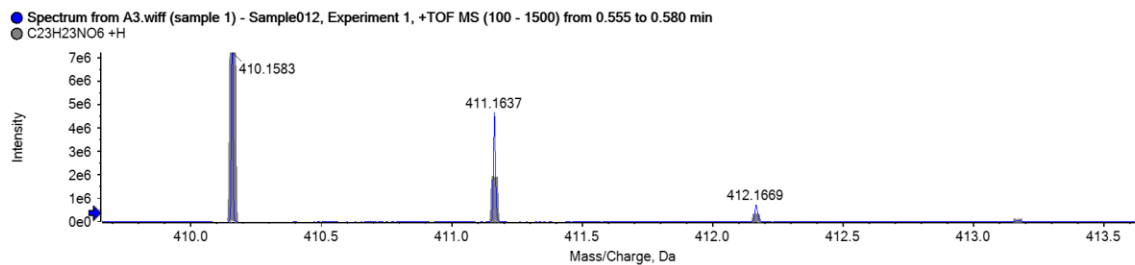

ESI-HRMS of Y8

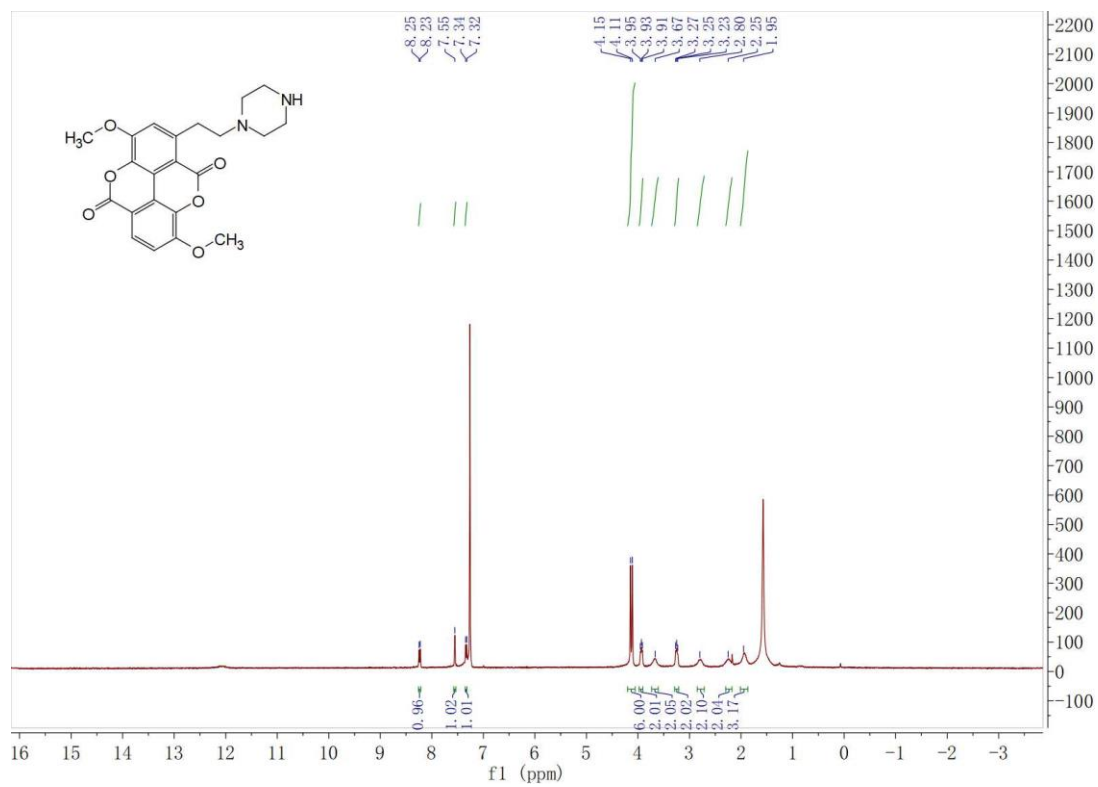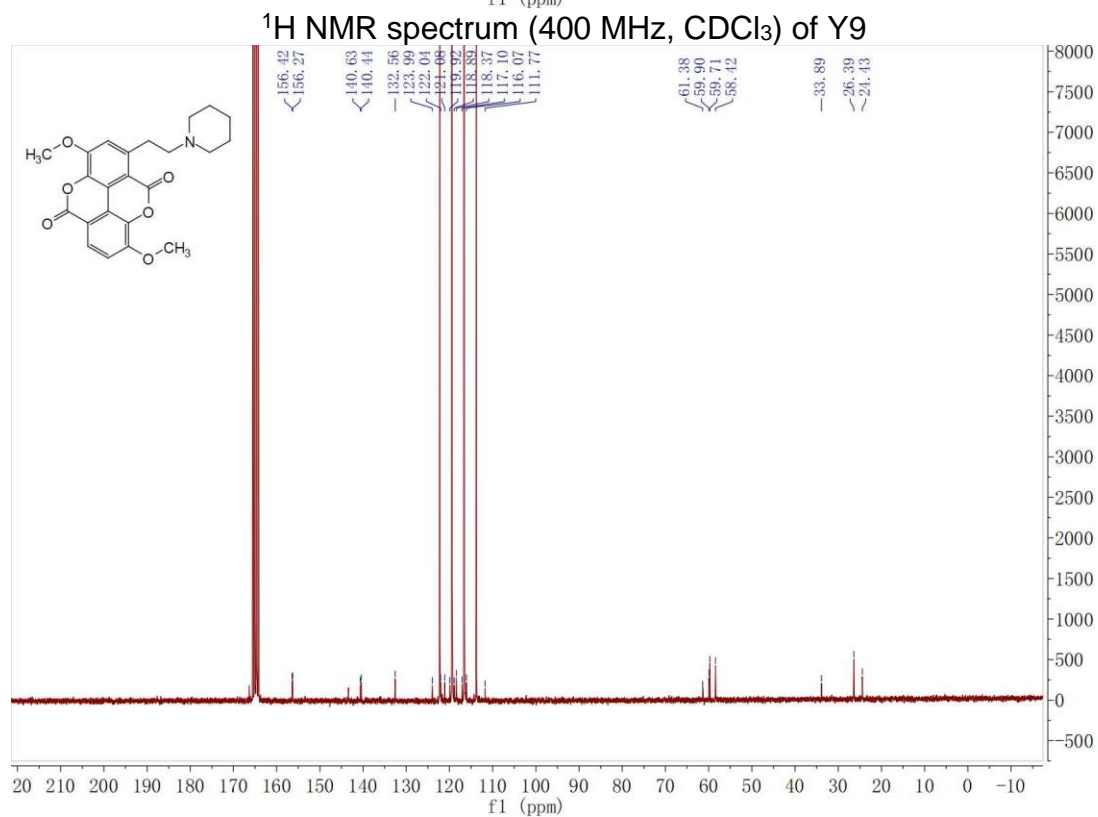

**<sup>13</sup>C NMR spectrum (100 MHz, CF<sub>3</sub>COOD) of Y9**

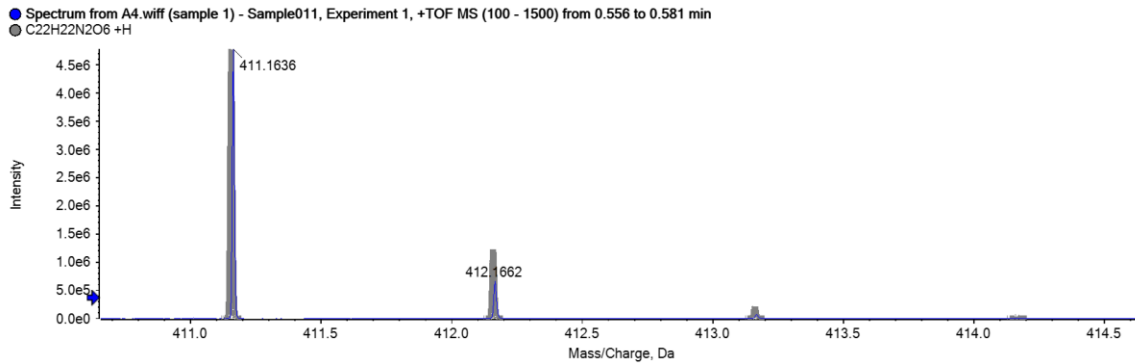

ESI-HRMS of Y9

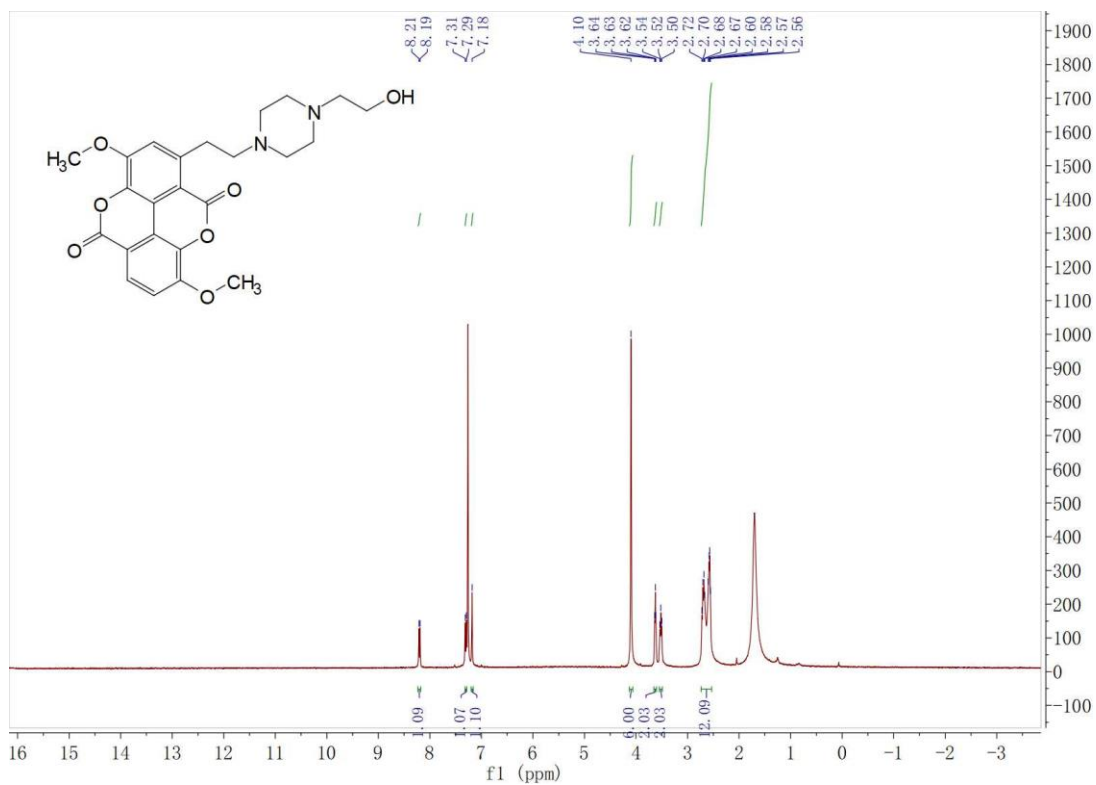

<sup>1</sup>H NMR spectrum (400 MHz, CDCl<sub>3</sub>) of Y10

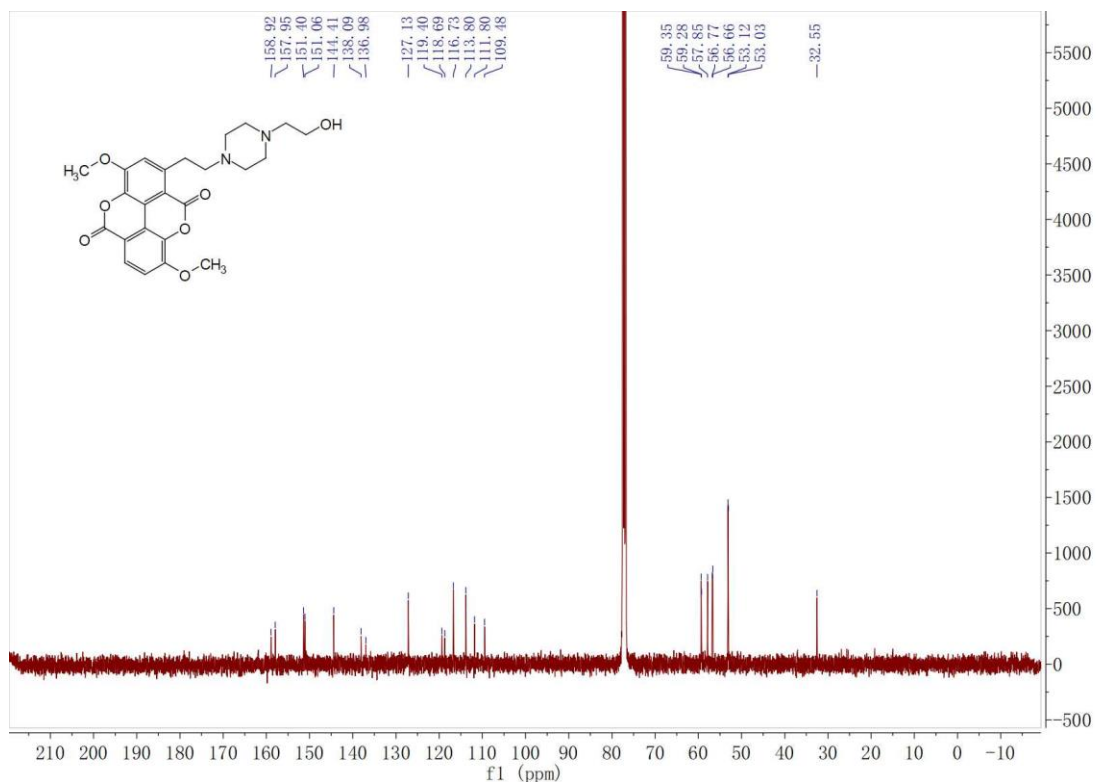

$^{13}\text{C}$  NMR spectrum (100 MHz,  $\text{CDCl}_3$ ) of Y10

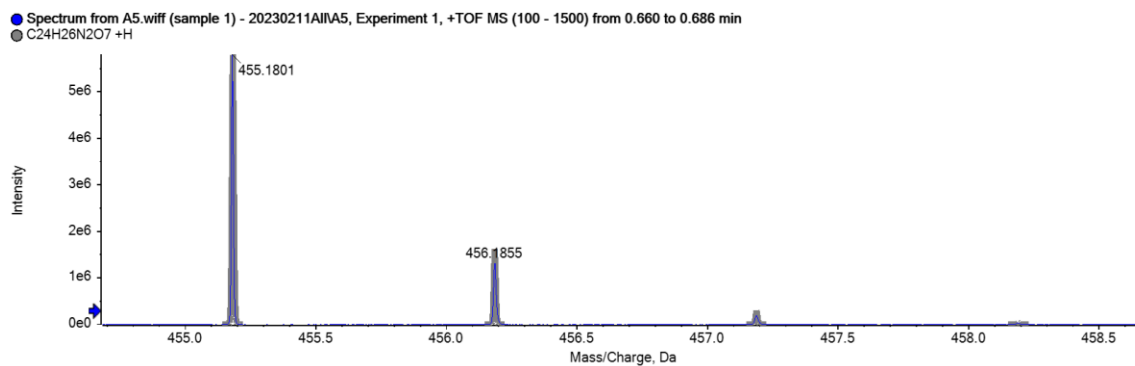

ESI-HRMS of Y10

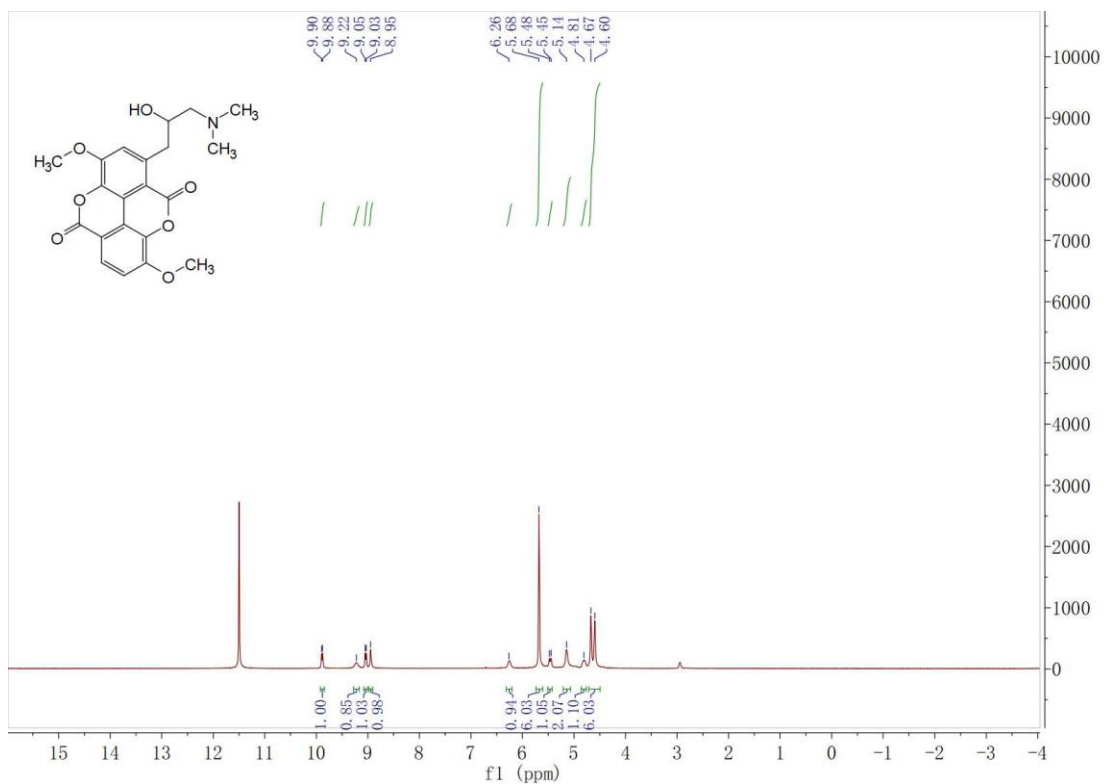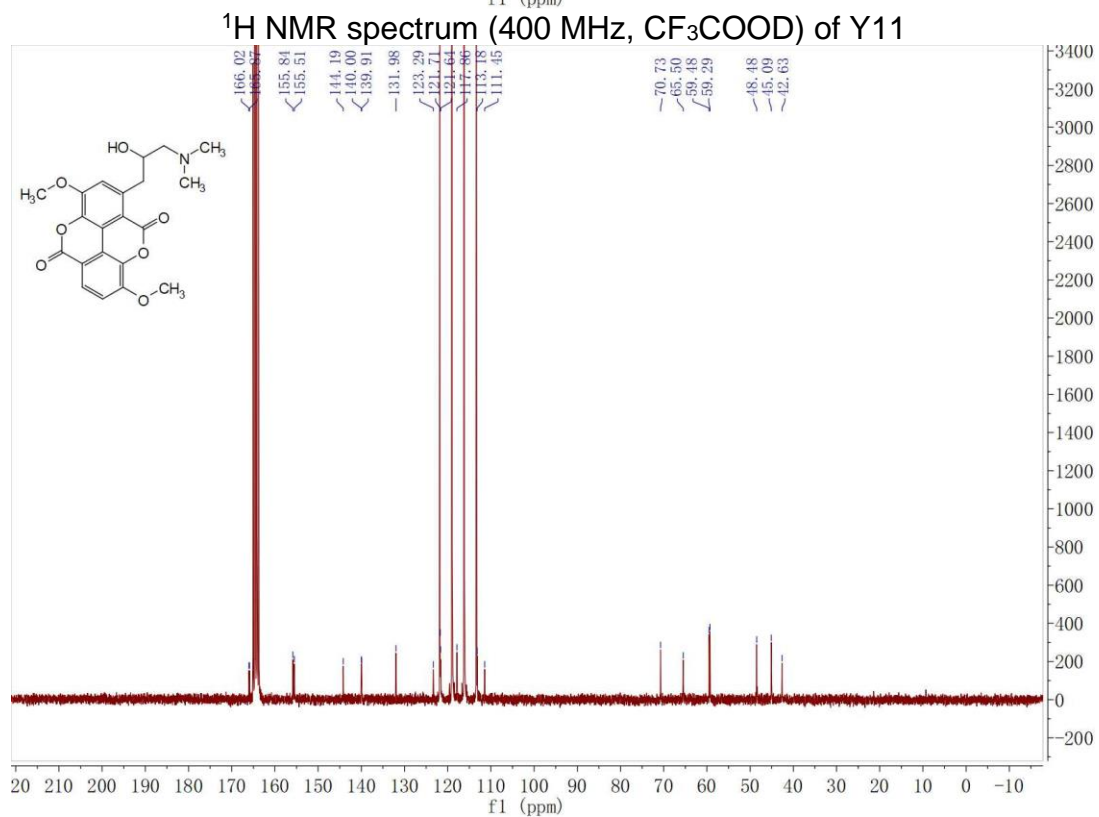

**<sup>13</sup>C NMR spectrum (100 MHz, CF<sub>3</sub>COOD) of Y11**



YJ-01#14 RT: 0.07 AV: 1 NL: 8.84E8  
T: FTMS - p ESI cr=0.00 Fullms [100.0000-1000.0000]

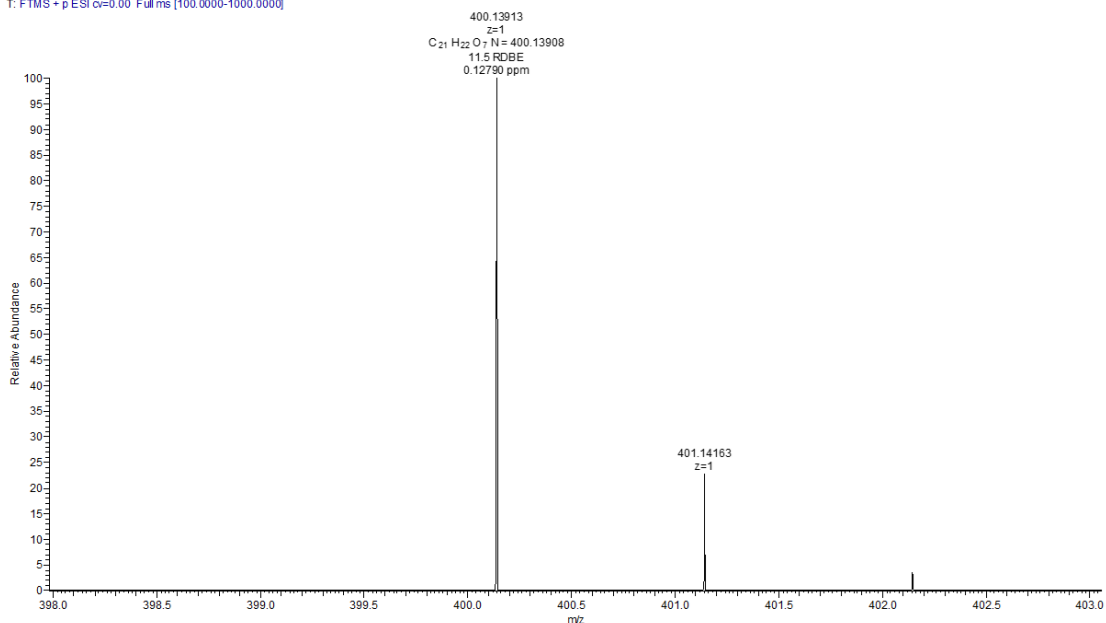

ESI-HRMS of Y11

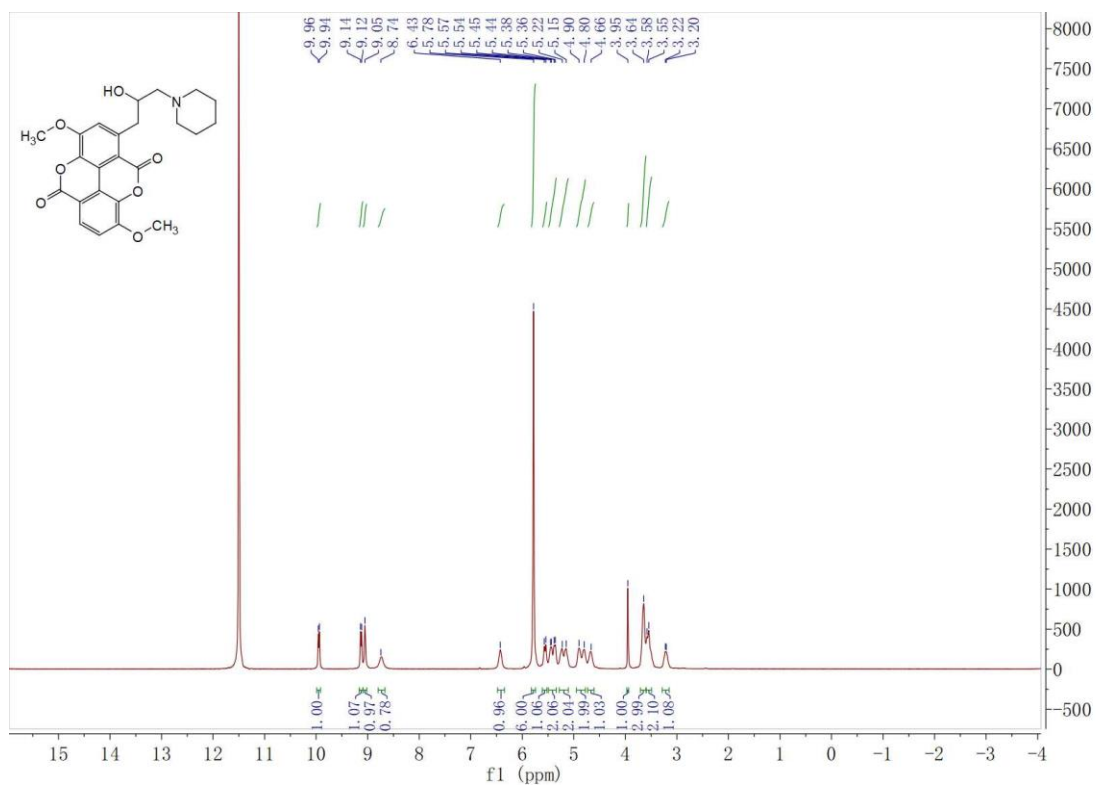

<sup>1</sup>H NMR spectrum (400 MHz, CF<sub>3</sub>COOD) of Y12

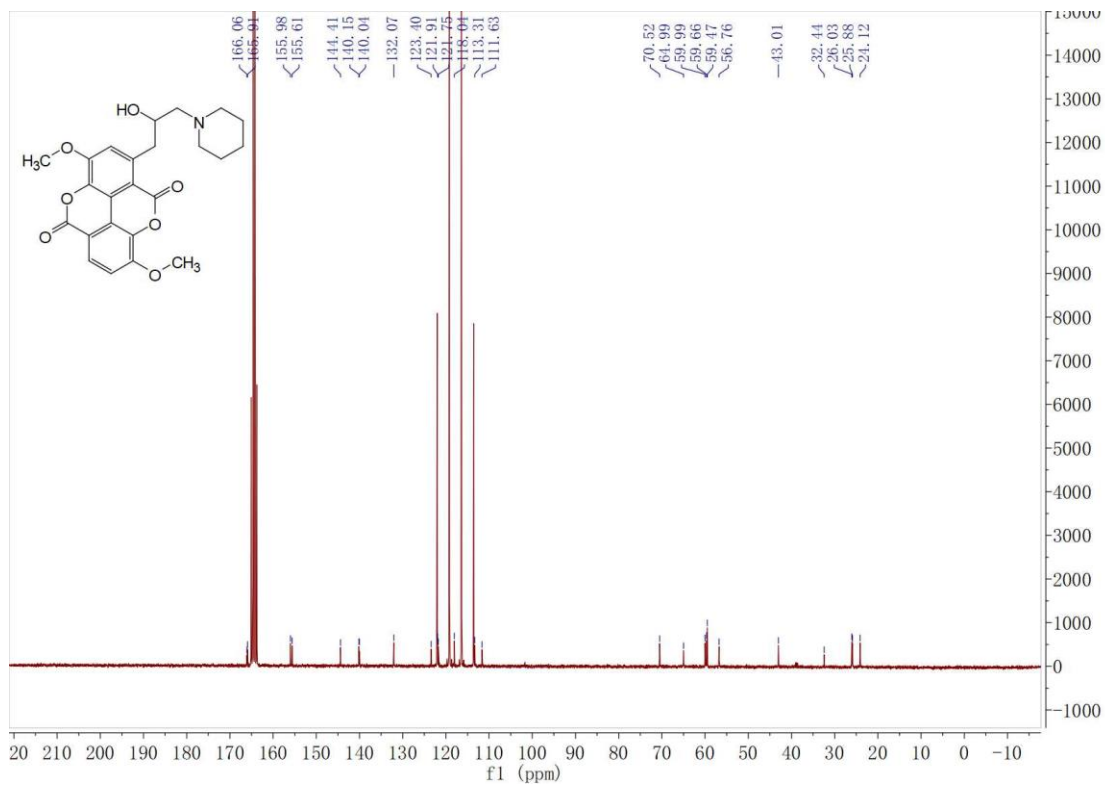

<sup>13</sup>C NMR spectrum (100 MHz, CF<sub>3</sub>COOD) of Y12

● Spectrum from B2.wiff (sample 1) - Sample020, Experiment 1, +TOF MS (100 - 1500) from 0.613 to 0.638 min  
● C<sub>24</sub>H<sub>25</sub>NO<sub>7</sub> +H

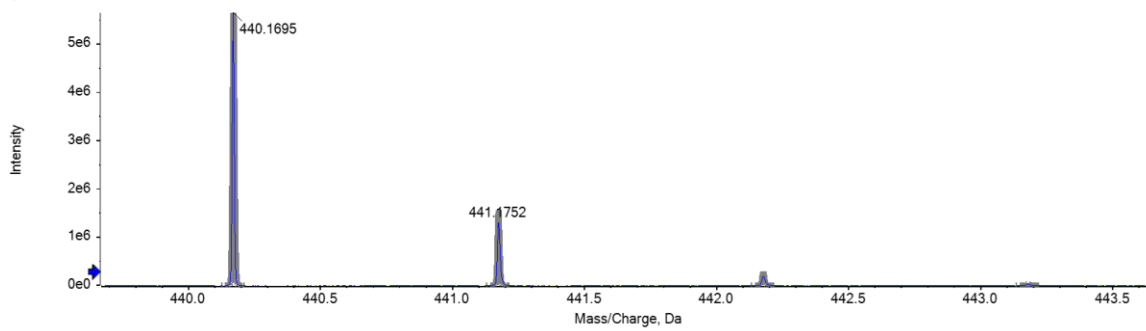

ESI-HRMS of Y12

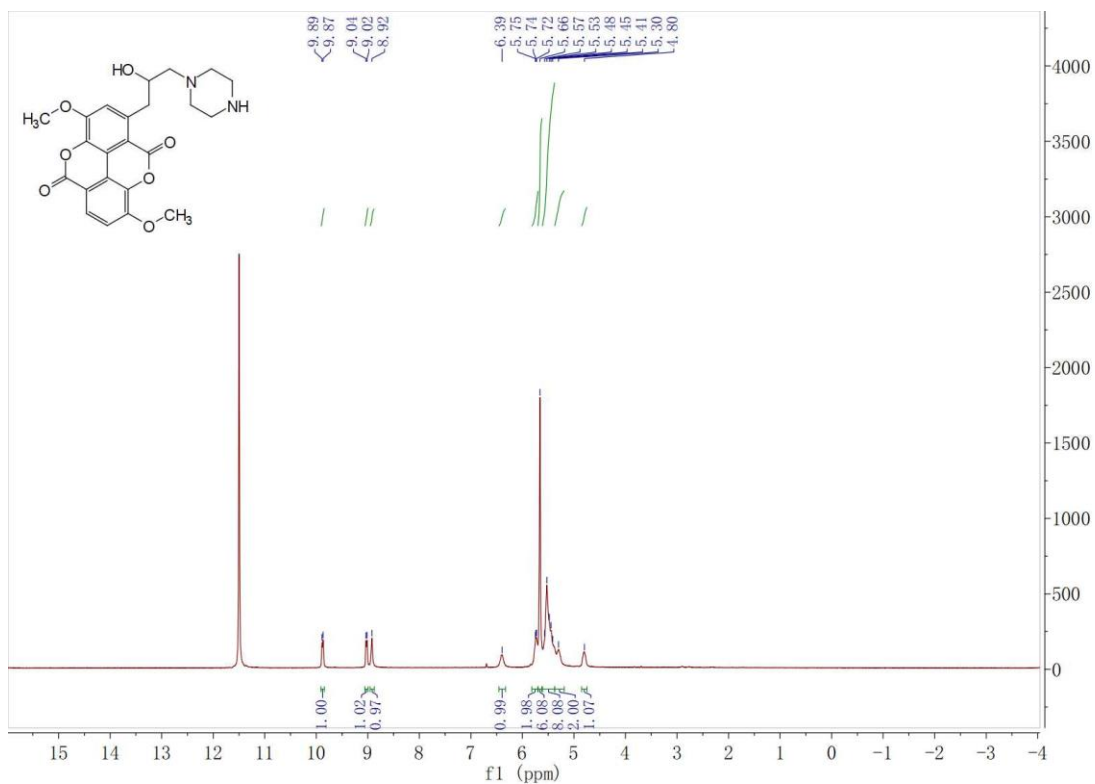

**<sup>1</sup>H NMR spectrum (400 MHz, CF<sub>3</sub>COOD) of Y13**

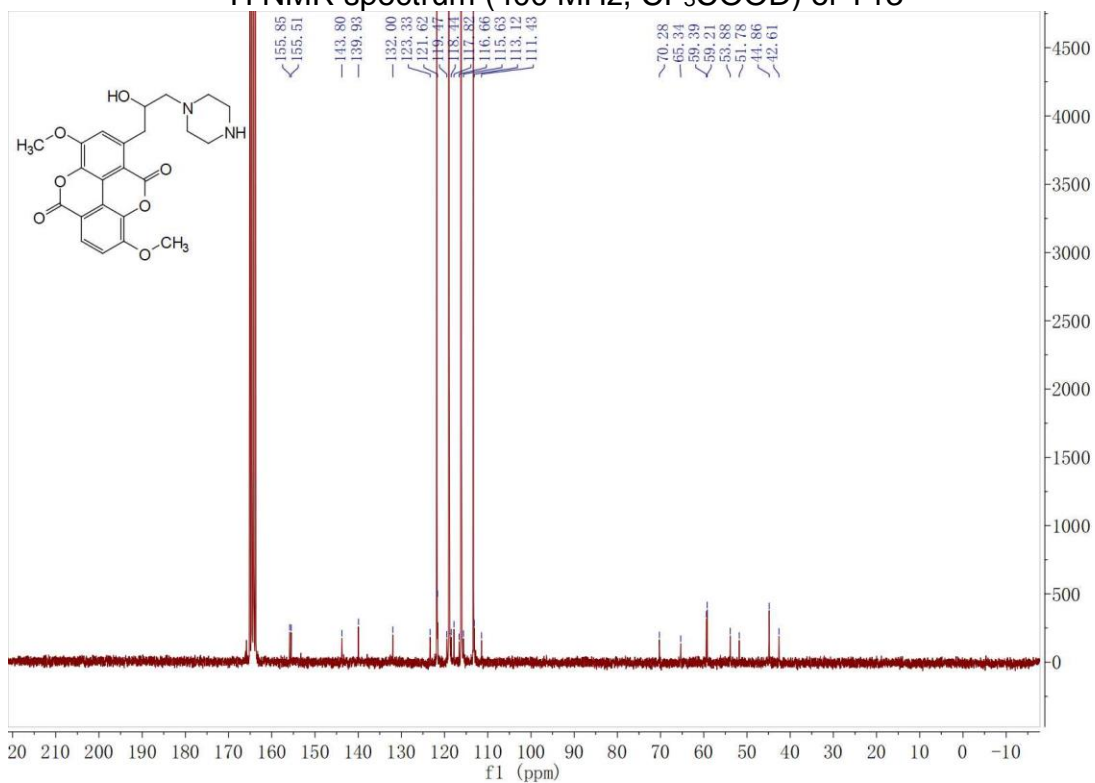

**<sup>13</sup>C NMR spectrum (100 MHz, CF<sub>3</sub>COOD) of Y13**

smu-b3 #29 RT: 0.15 AV: 1 NL: 1.32E7  
 T: FTMS + p ESI c=0.00 Full ms [200.0000-800.0000]  
 441.16562  
 z=1  
 C<sub>23</sub>H<sub>25</sub>O<sub>7</sub> N<sub>2</sub> = 441.16563  
 12.5 RDBE  
 -0.01962 ppm

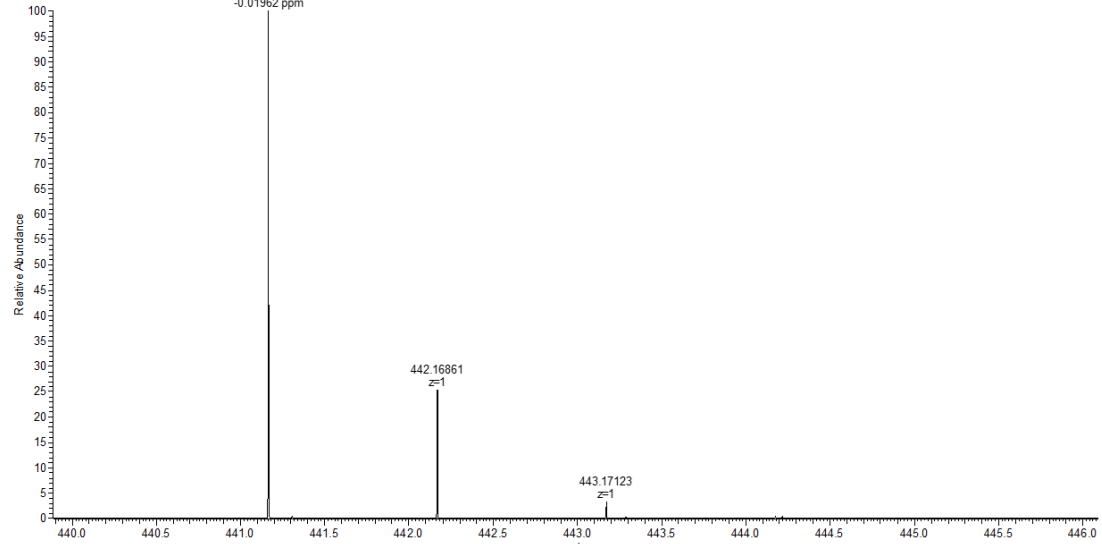

ESI-HRMS of Y13

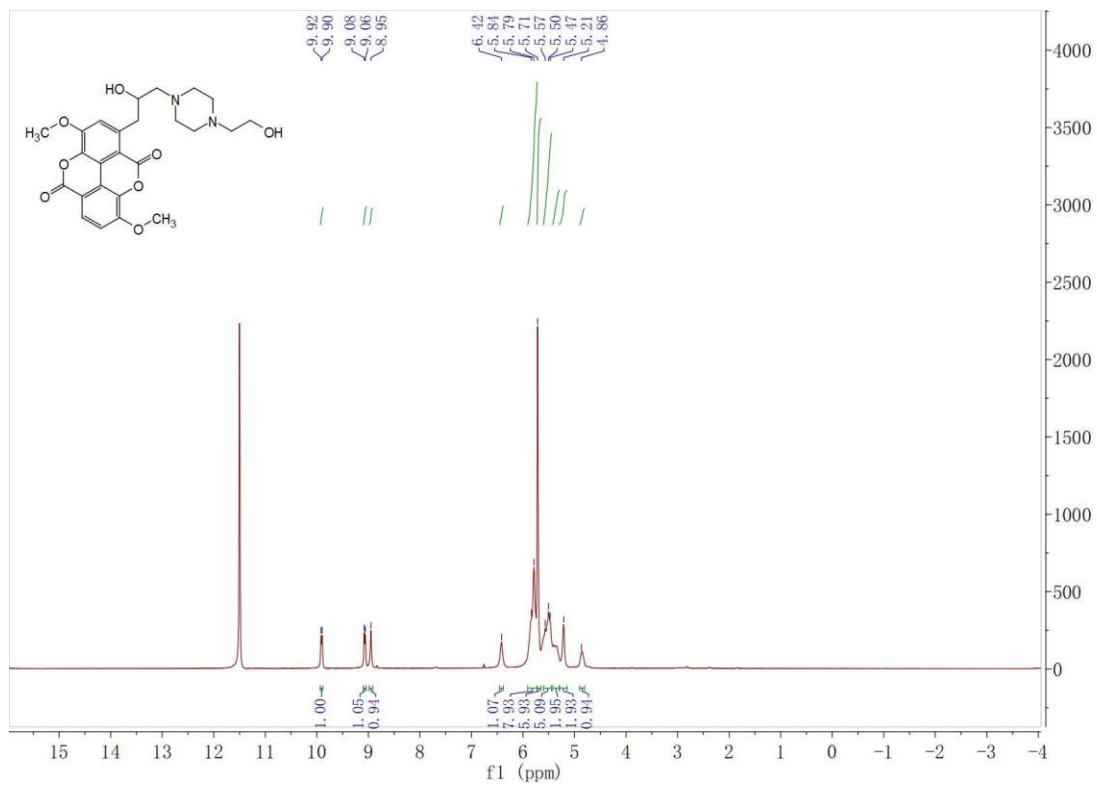

<sup>1</sup>H NMR spectrum (400 MHz, CF<sub>3</sub>COOD) of Y14

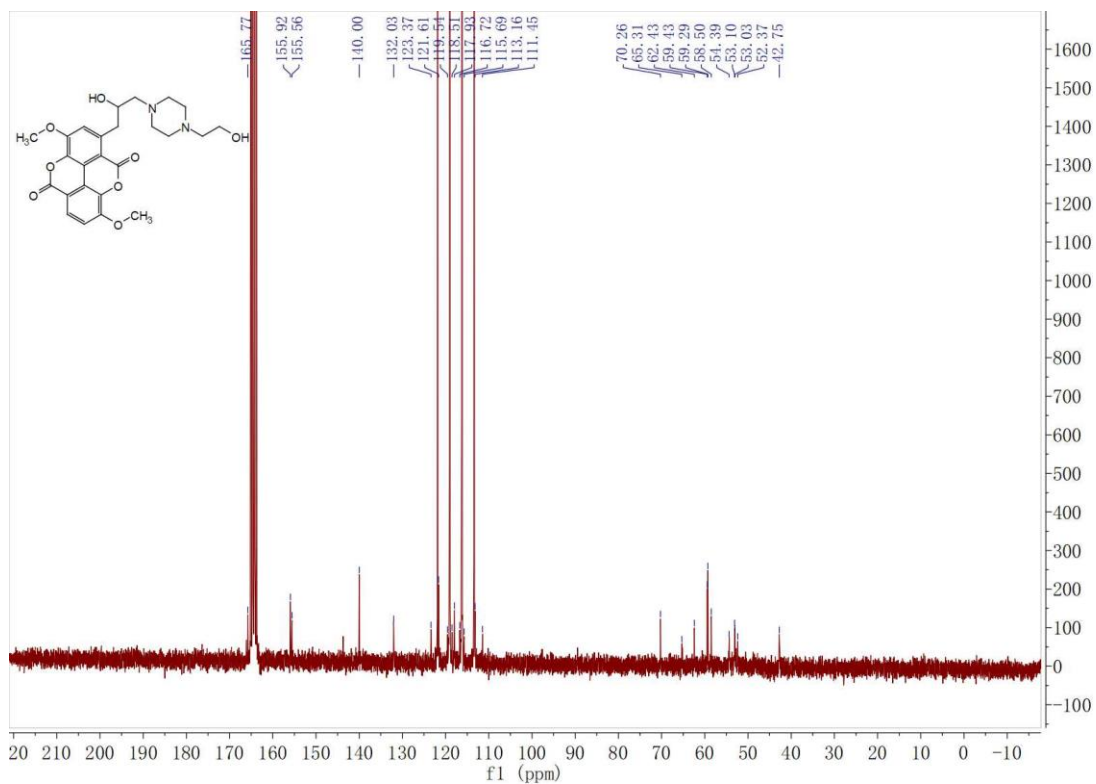

$^{13}\text{C}$  NMR spectrum (100 MHz,  $\text{CF}_3\text{COOD}$ ) of Y14

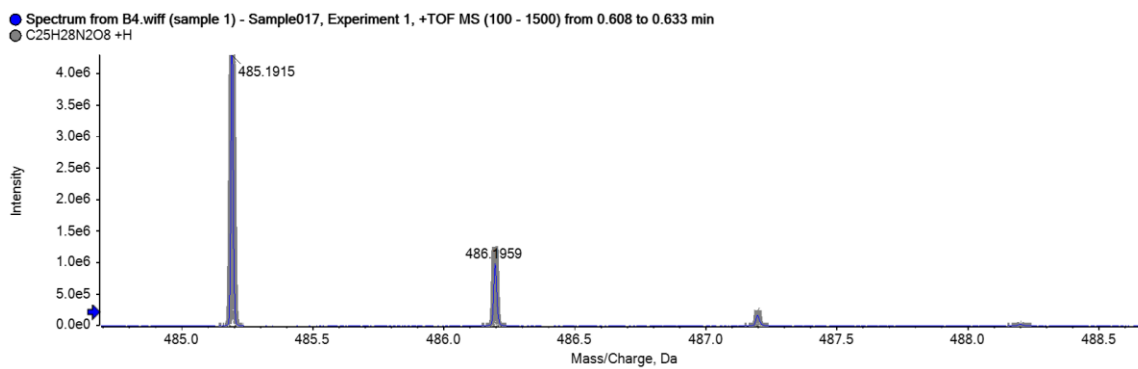

ESI-HRMS of Y14

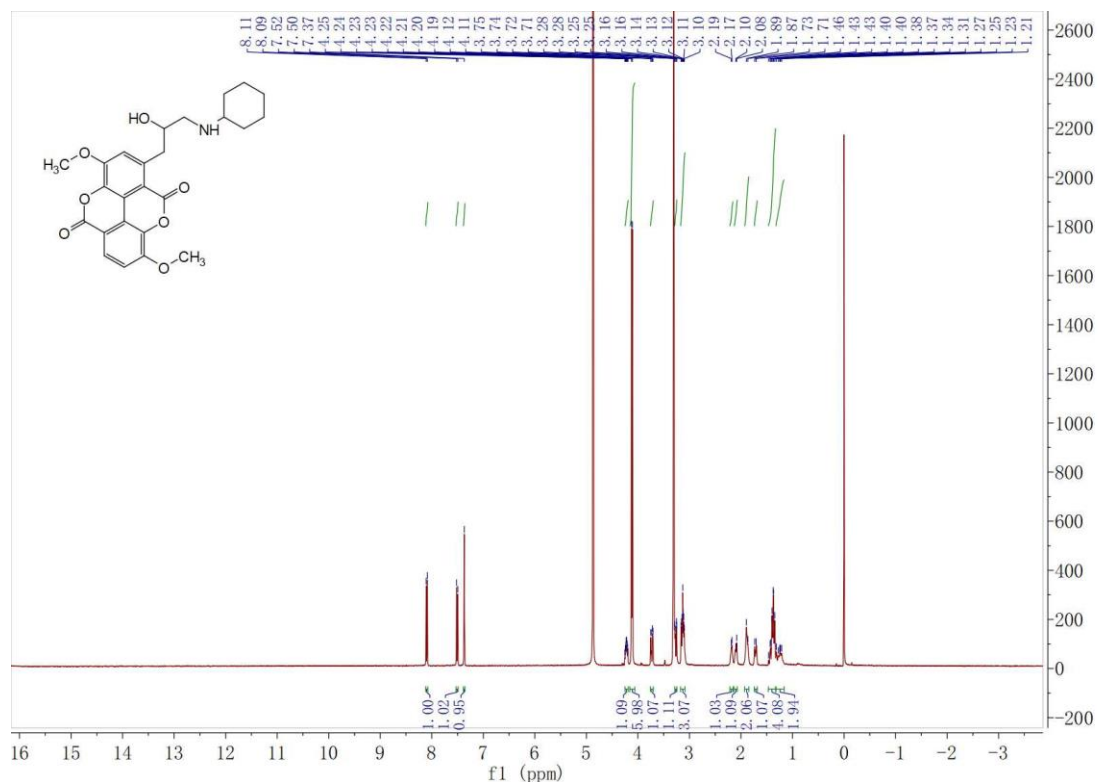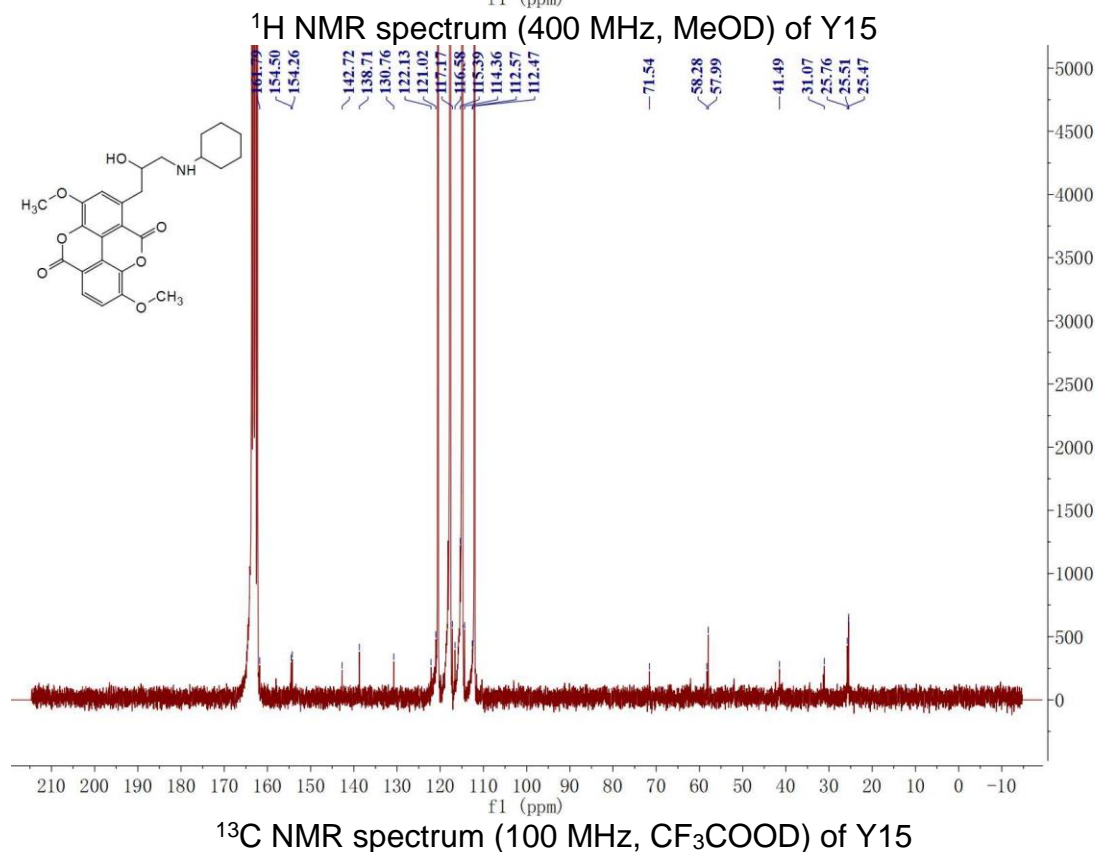

● Spectrum from B5.wiff (sample 1) - Sample009, Experiment 1, +TOF MS (100 - 1500) from 0.632 to 0.657 min  
● C<sub>25</sub>H<sub>27</sub>N<sub>0</sub>O<sub>7</sub> +H

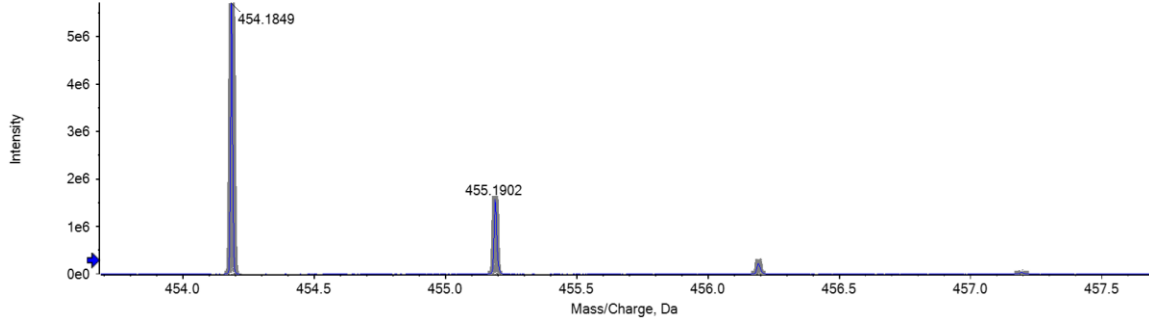

### ESI-HRMS of Y15

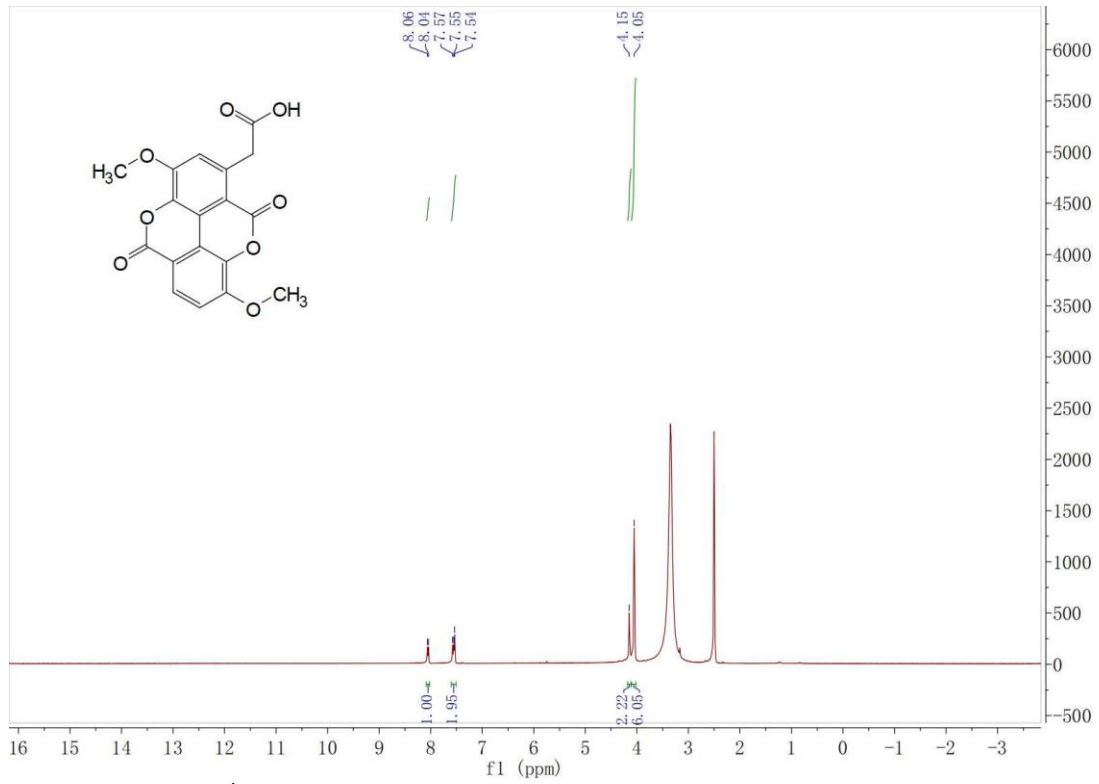

<sup>1</sup>H NMR spectrum (400 MHz, DMSO-*d*<sub>6</sub>) of Y16

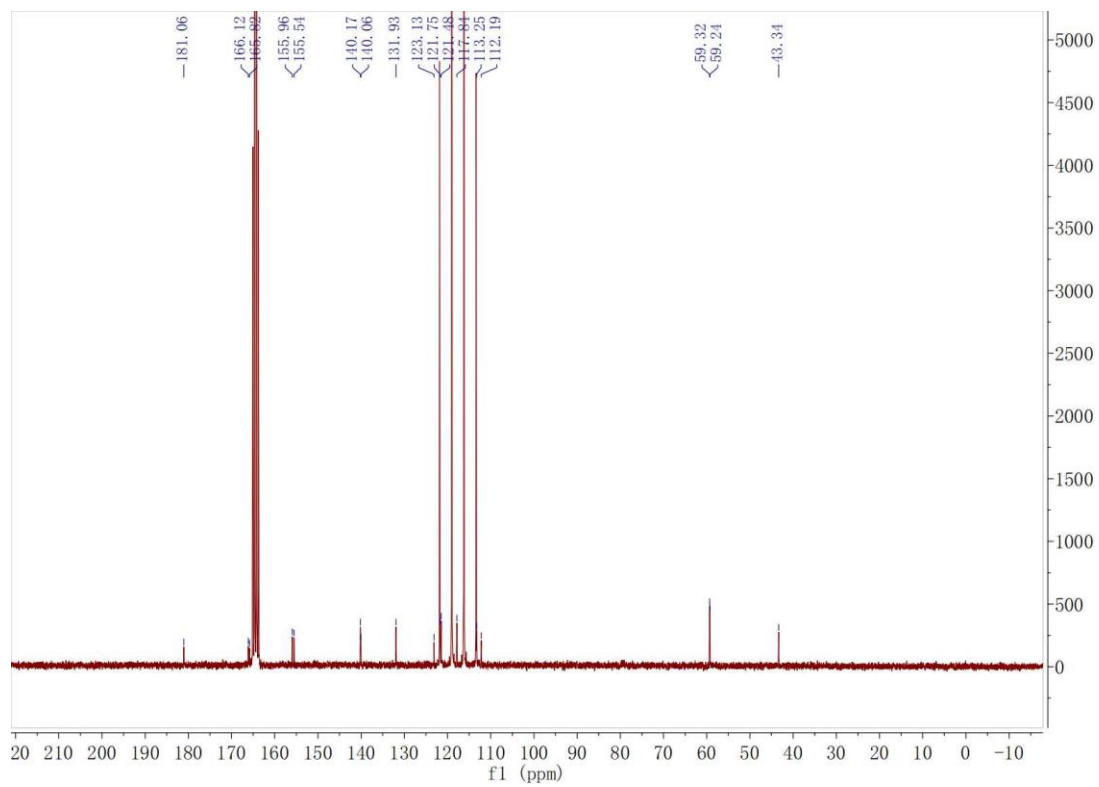

<sup>13</sup>C NMR spectrum (100 MHz, CF<sub>3</sub>COOD) of Y16

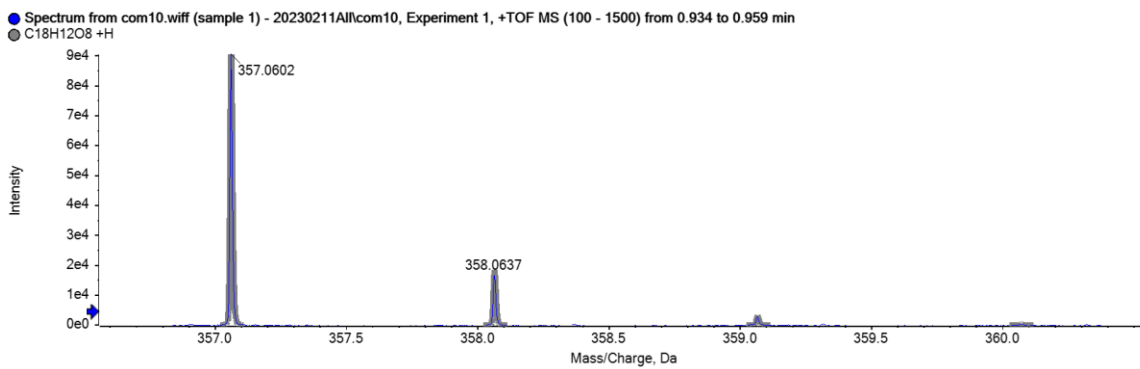

ESI-HRMS of Y16



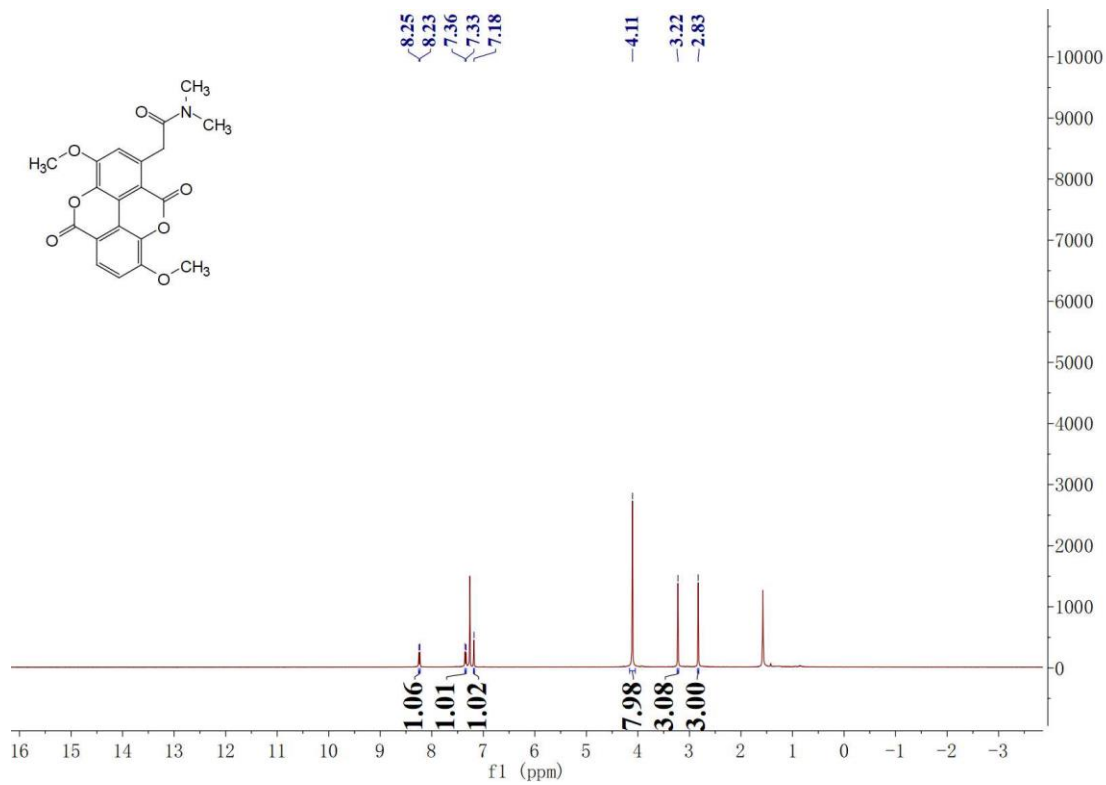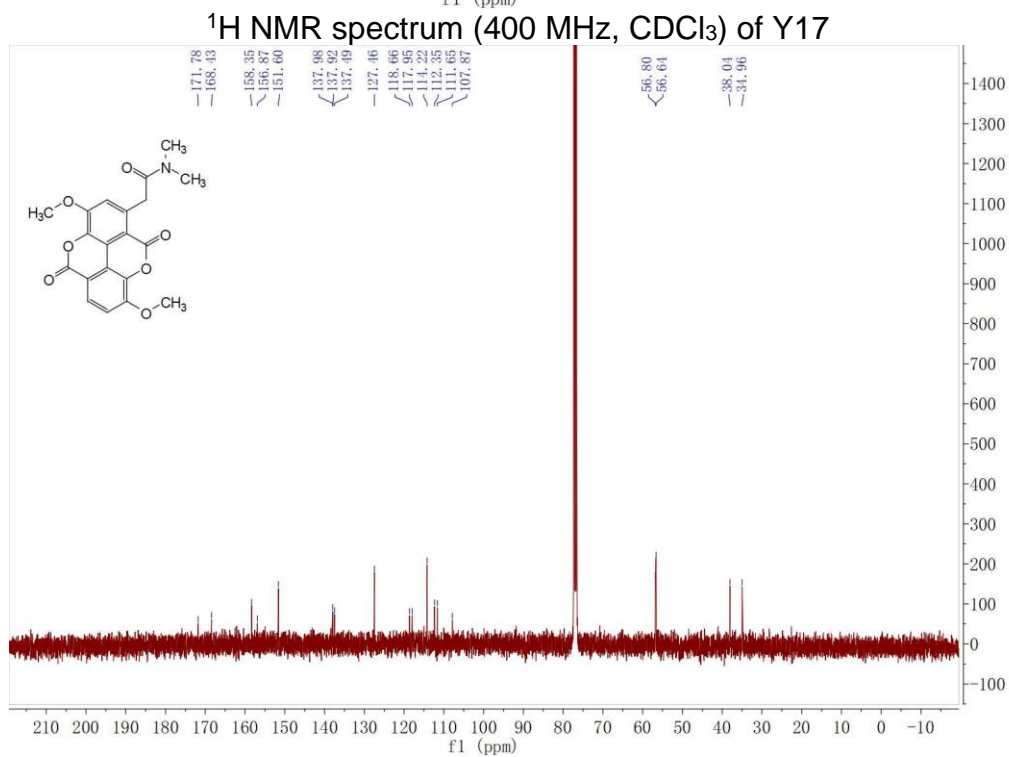

YJJ-c1 #15 RT: 0.08 AV: 1 NL: 5.96E6  
T: FTMS + p ESI cv=0.00 Full ms [100.0000-1000.0000]

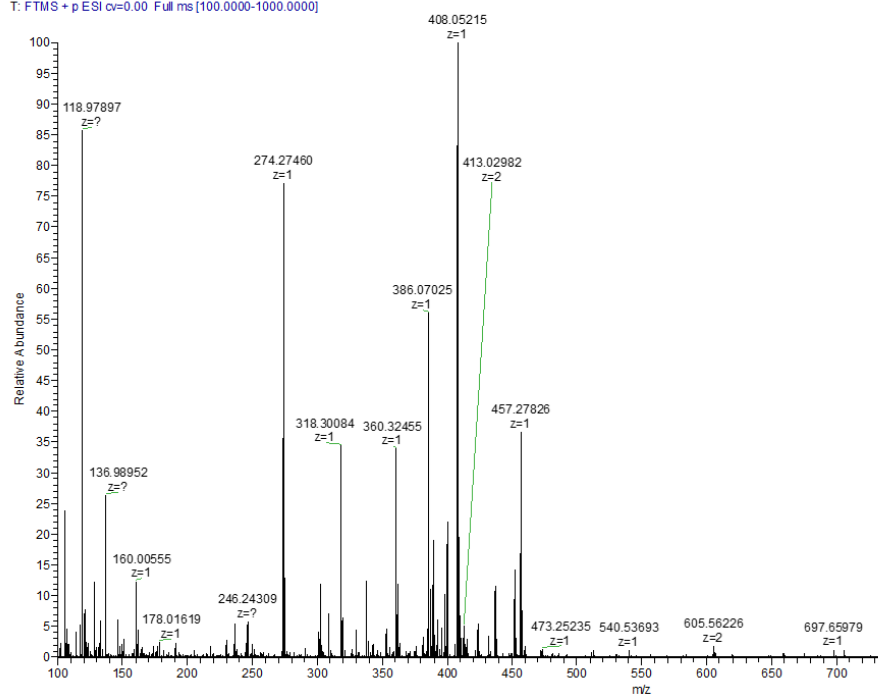

ESI-HRMS of Y17

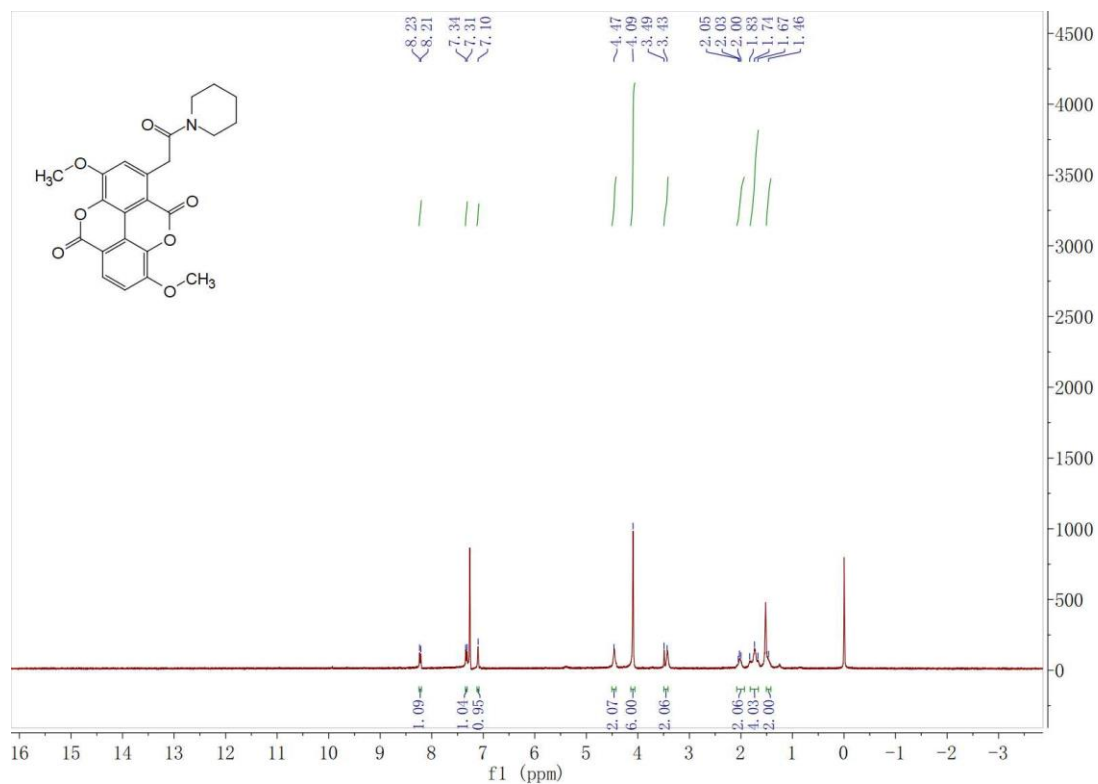

<sup>1</sup>H NMR spectrum (400 MHz, CDCl<sub>3</sub>) of Y18

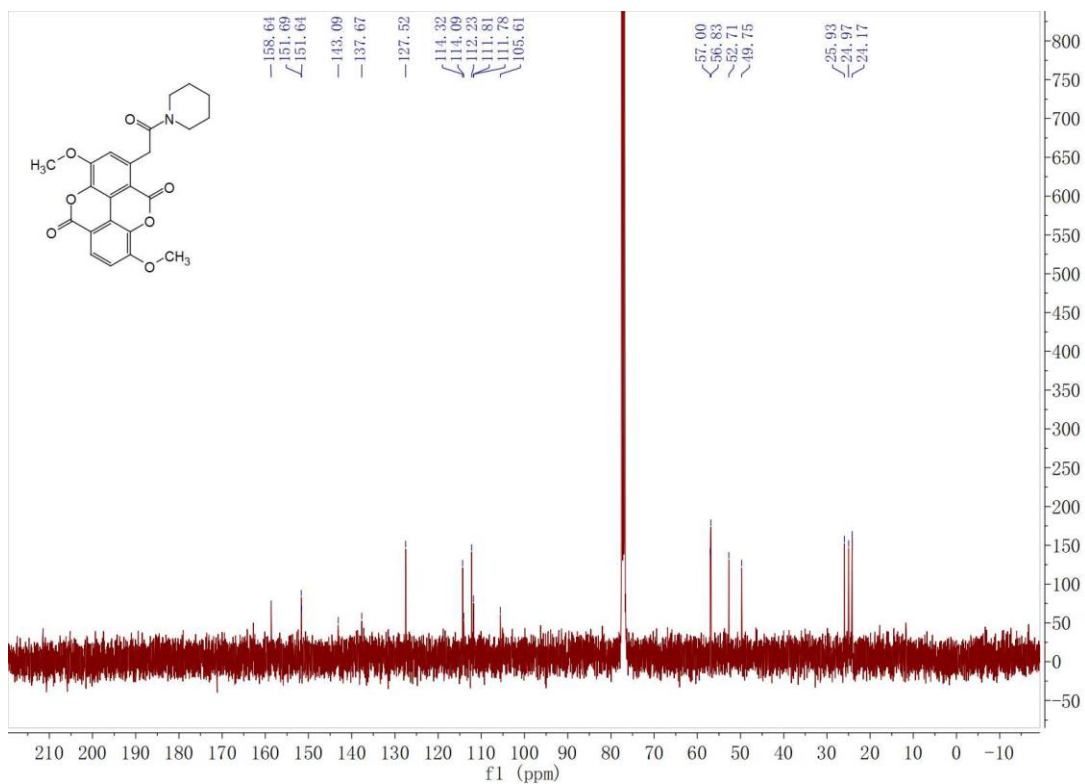

$^{13}\text{C}$  NMR spectrum (100 MHz,  $\text{CDCl}_3$ ) of Y18

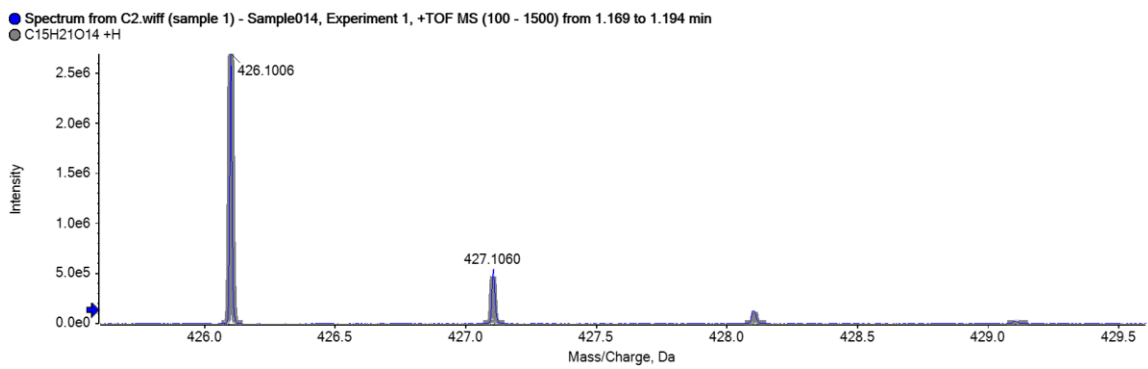

ESI-HRMS of Y18

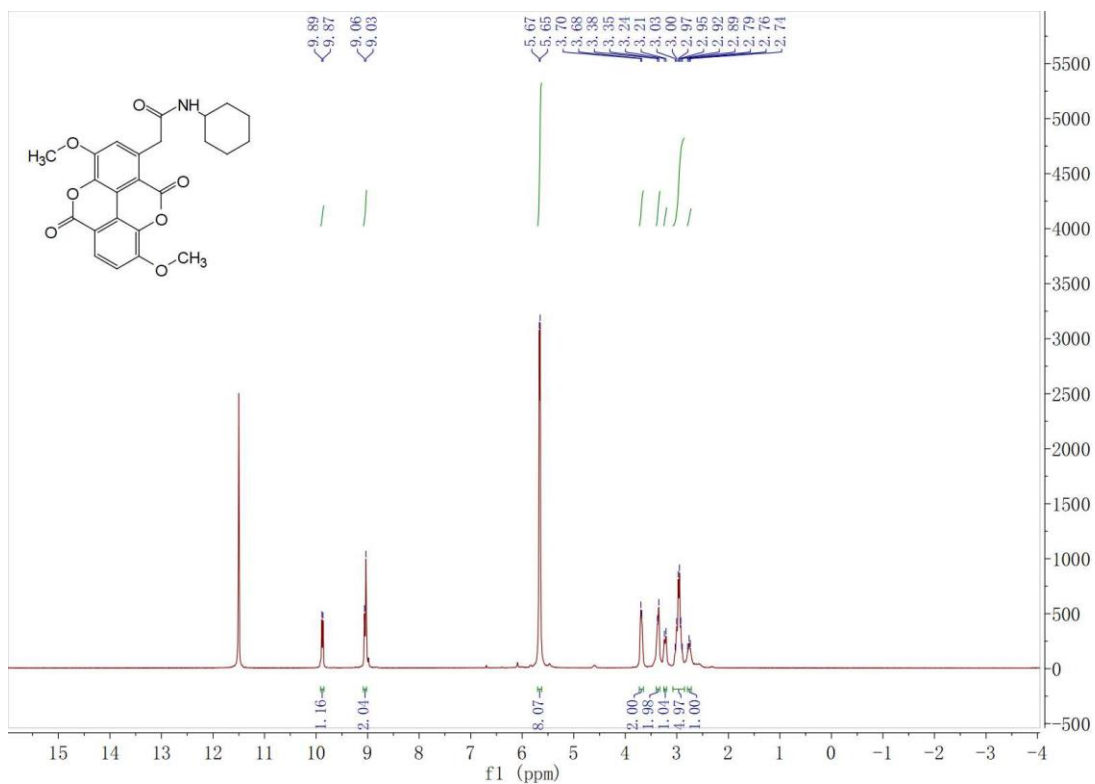

<sup>1</sup>H NMR spectrum (400 MHz, CF<sub>3</sub>COOD) of Y19

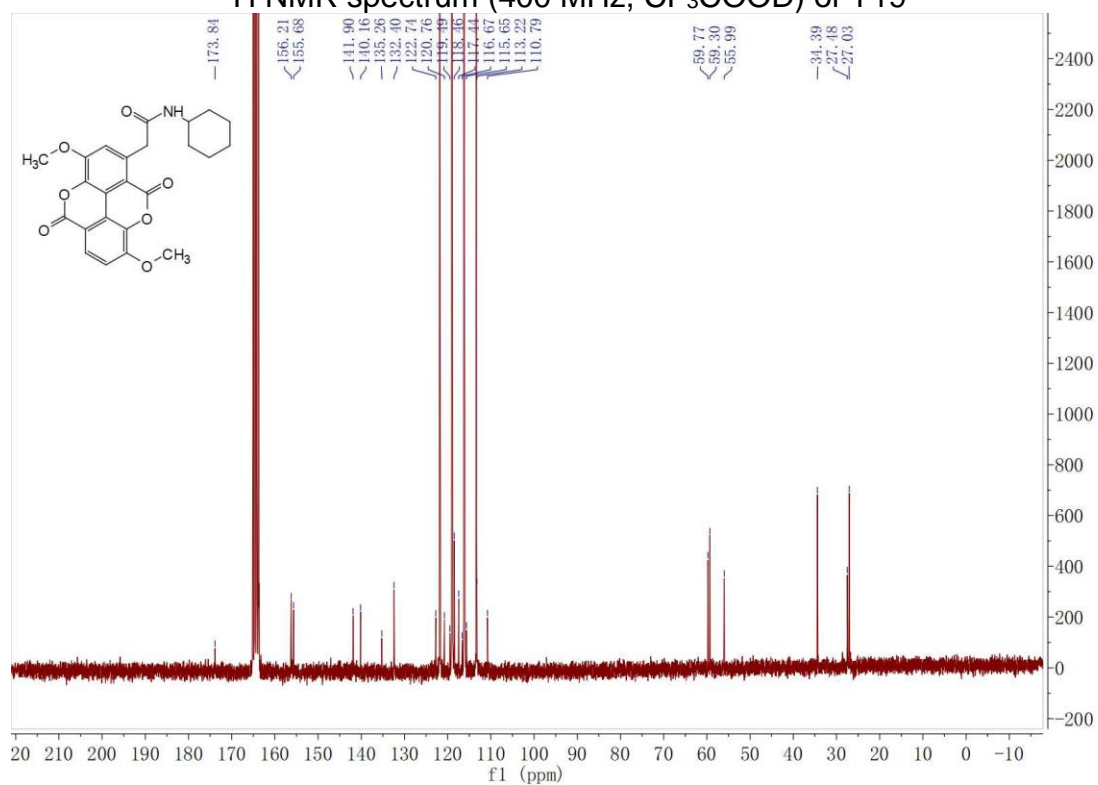

<sup>13</sup>C NMR spectrum (100 MHz, CF<sub>3</sub>COOD) of Y19

● Spectrum from C3.wiff (sample 1) - Sample021, Experiment 1, +TOF MS (100 - 1500) from 1.429 to 1.454 min  
● C<sub>24</sub>H<sub>23</sub>NO<sub>7</sub> +H

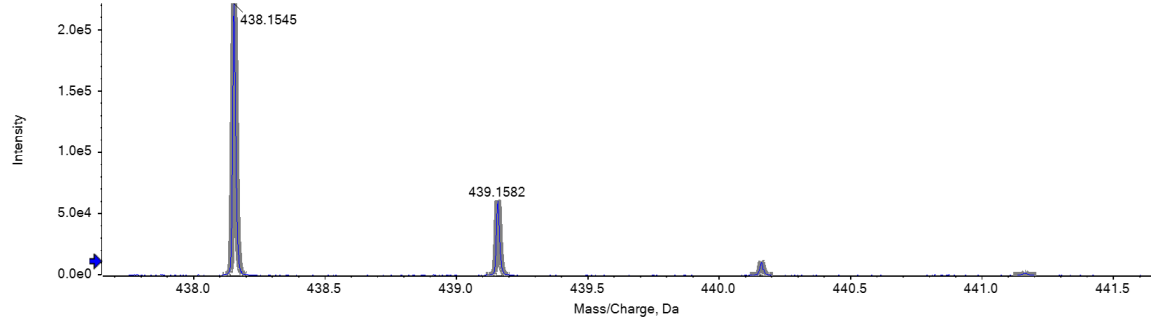

### ESI-HRMS of Y19

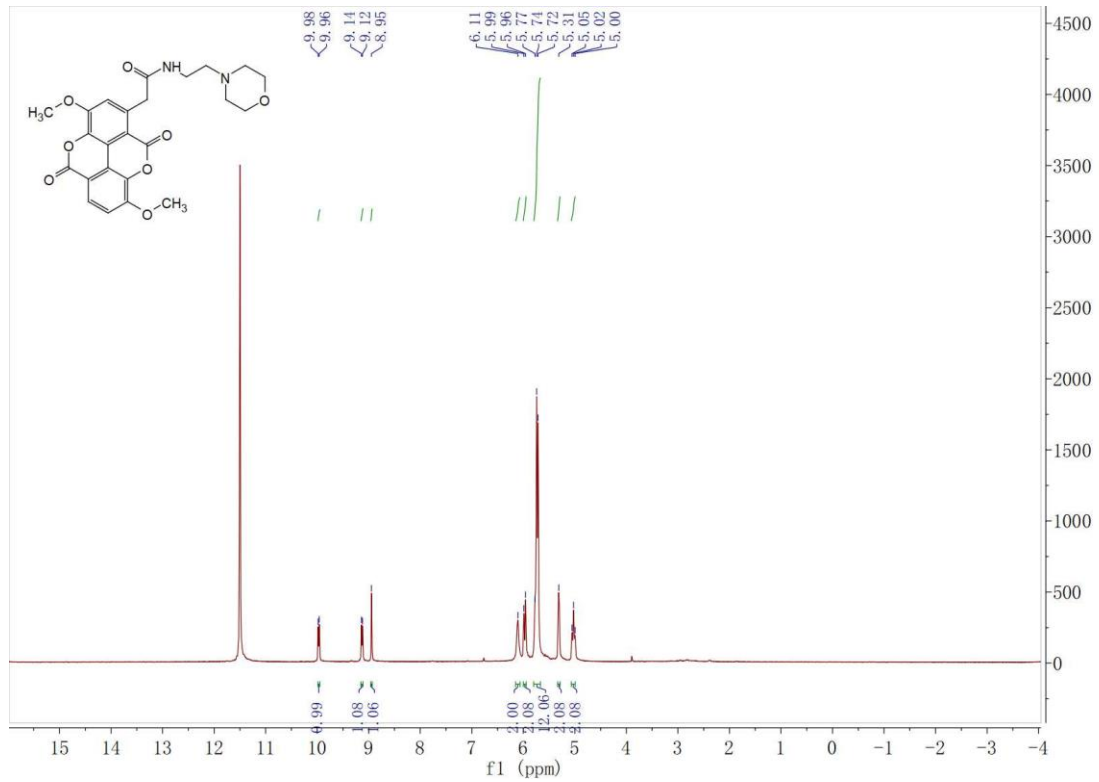

<sup>1</sup>H NMR spectrum (400 MHz, CF<sub>3</sub>COOD) of Y20

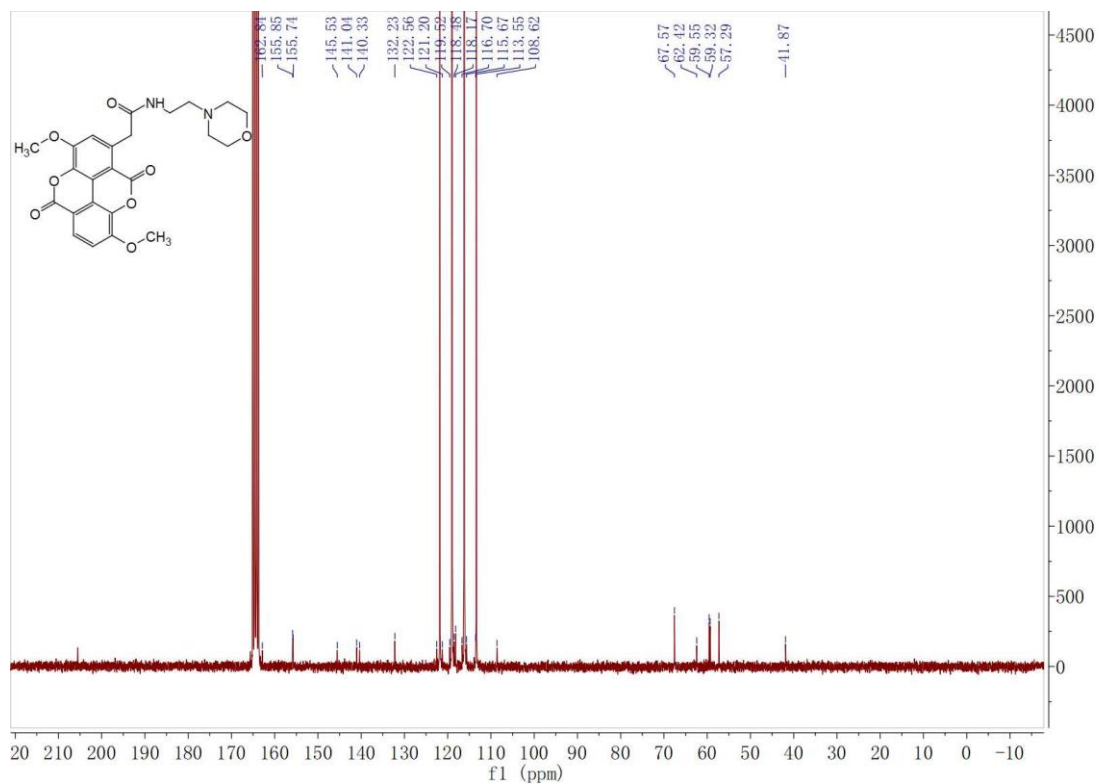

$^{13}\text{C}$  NMR spectrum (100 MHz,  $\text{CF}_3\text{COOD}$ ) of Y20

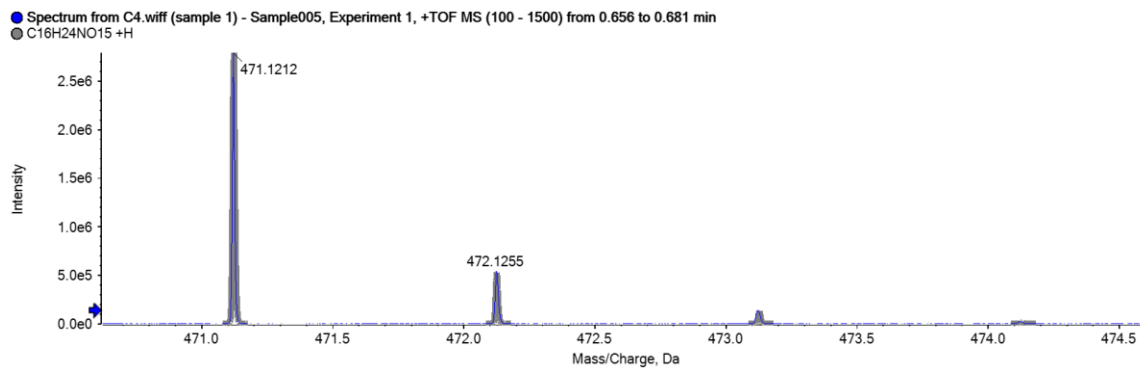

ESI-HRMS of Y20

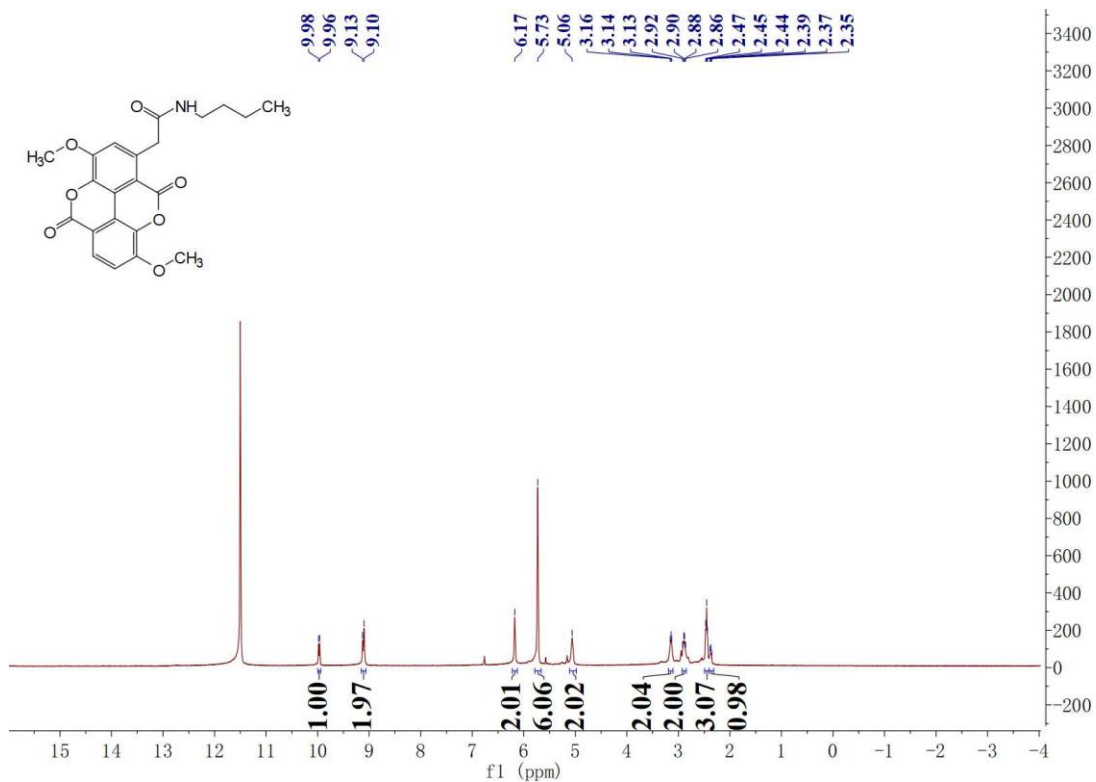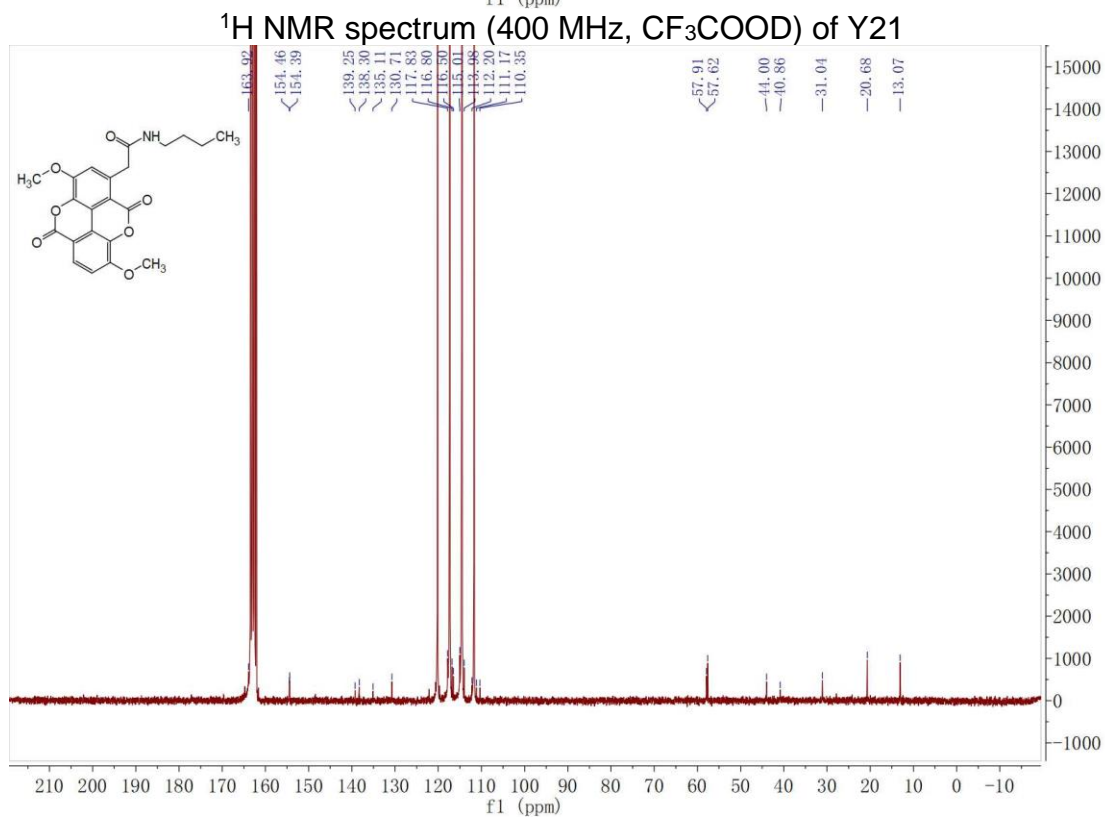

**<sup>13</sup>C NMR spectrum (100 MHz, CF<sub>3</sub>COOD) of Y21**

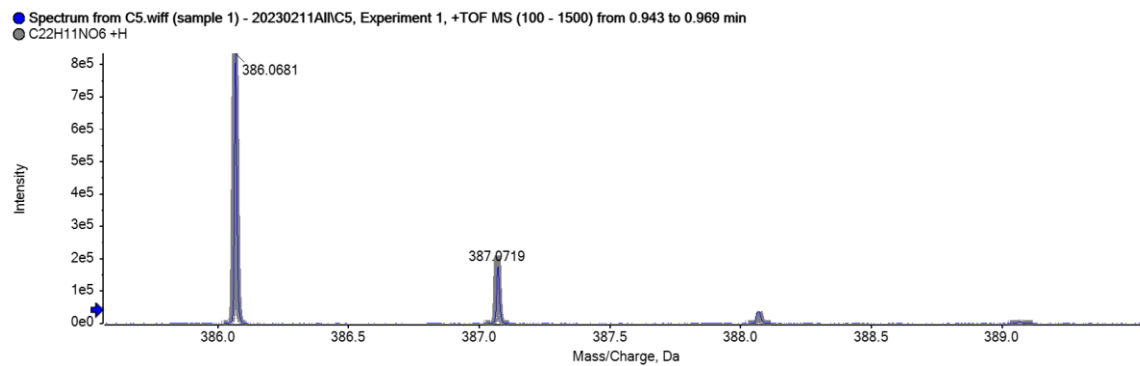

### ESI-HRMS of Y21

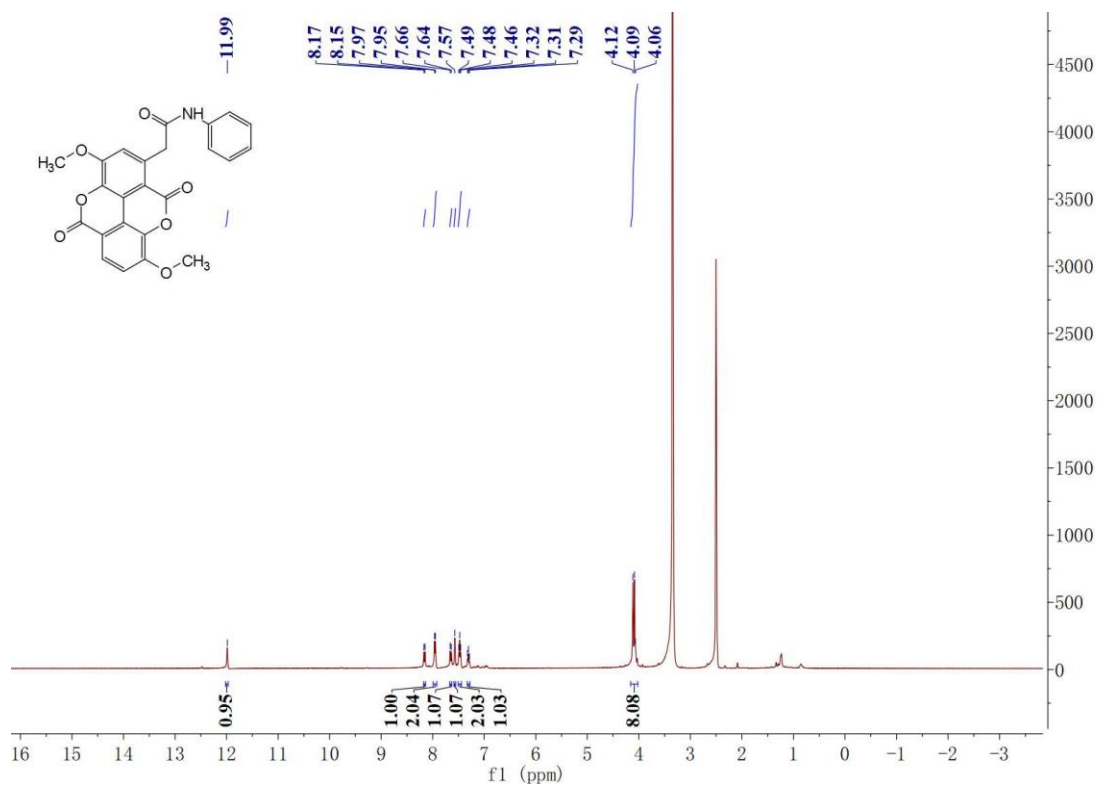

<sup>1</sup>H NMR spectrum (400 MHz, DMSO-d<sub>6</sub>) of Y22



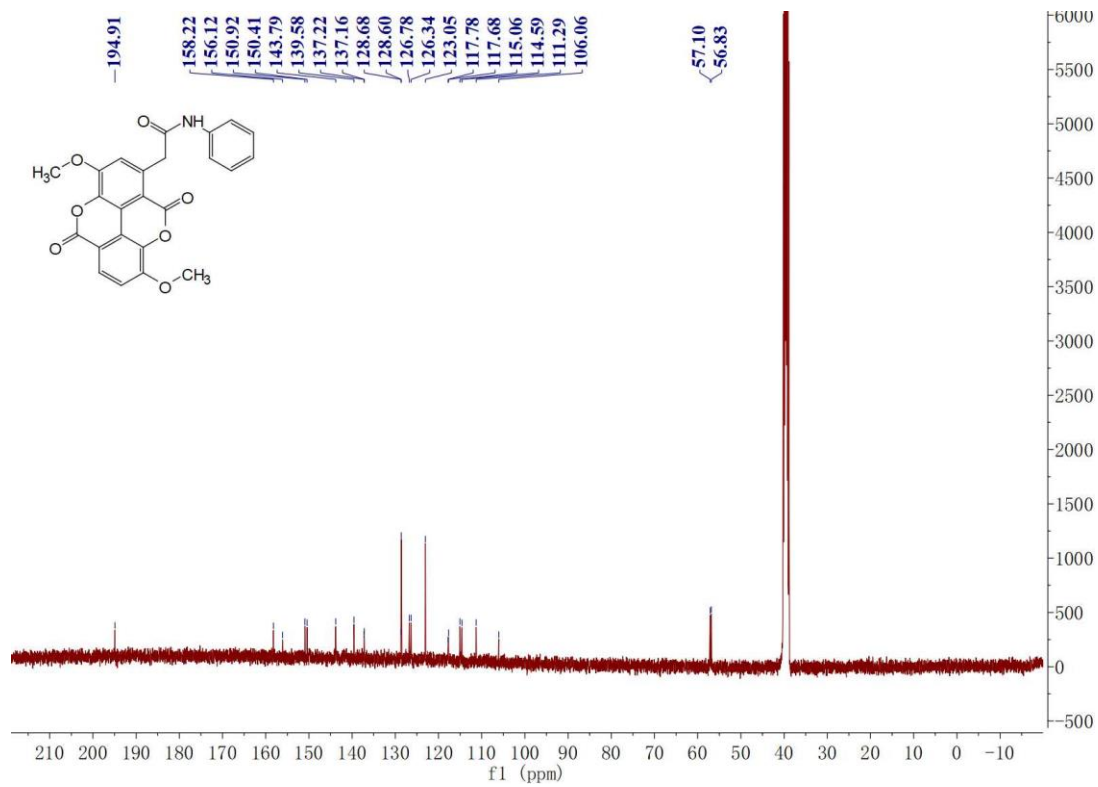

<sup>13</sup>C NMR spectrum (100 MHz, DMSO-d<sub>6</sub>) of Y22

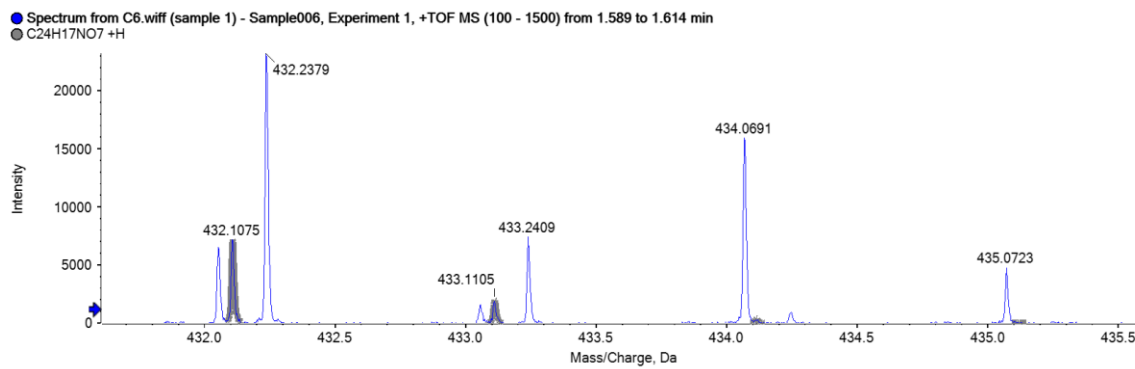

ESI-HRMS of Y22
